# Supplementary material for: Early Mechanisms of Pathobiology Are Revealed by Transcriptional Temporal Dynamics in Hippocampal CA1 Neurons of Prion Infected Mice
Source: PubMed Central journal article supplement (PMC3493483; doi:10.1371/journal.ppat.1003002), 2012-11-08
Supplement: ppat.1003002.s009.pdf [file ppat.1003002.s009.pdf]

|               | 70 DPI    |        | 90 DPI    |        | 110 DPI   |        | 130 DPI   |        | EP        |        |
|---------------|-----------|--------|-----------|--------|-----------|--------|-----------|--------|-----------|--------|
|               | Log Ratio | FDR    | Log Ratio | FDR    | Log Ratio | FDR    | Log Ratio | FDR    | Log Ratio | FDR    |
| 5430435G22Rik | -0.464    | 0.126  | -0.074    | 12.522 | -0.115    | 33.124 | 0.134     | 13.893 | 0.481     | 31.624 |
| A2LD1         | -0.141    | 3.157  | -0.609    | 2.773  | -0.180    | 12.575 | 0.138     | 41.825 | 0.451     | 0.213  |
| AADAT         | 0.235     | 12.647 | 0.187     | 3.009  | -0.130    | 6.932  | -1.312    | 0.061  | -0.150    | 24.398 |
| ABCA3         | 0.124     | 49.540 | -0.443    | 0.514  | 0.021     | 59.432 | 0.103     | 32.497 | 0.618     | 0.039  |
| ABCA5         | -0.378    | 0.511  | 0.262     | 0.595  | -0.217    | 3.475  | -0.643    | 11.241 | 0.246     | 24.398 |
| ABCB10        | -0.754    | 0.052  | 0.594     | 1.086  | -0.372    | 4.053  | -0.162    | 47.420 | -0.489    | 8.002  |
| Abcb1b        | 0.596     | 0.052  | 0.562     | 2.123  | -0.405    | 2.659  | -0.132    | 0.573  | -0.265    | 6.001  |
| ABCC1         | -0.134    | 37.036 | 0.289     | 4.122  | -0.157    | 22.899 | -0.302    | 5.543  | 0.460     | 0.746  |
| ABCC3         | 0.042     | 49.540 | -0.204    | 3.009  | 0.062     | 49.127 | -0.072    | 41.825 | 0.857     | 0.021  |
| ABCC5         | -0.172    | 15.278 | 0.806     | 0.602  | 0.060     | 49.127 | 0.244     | 3.866  | 0.642     | 0.021  |
| ABHD16B       | 0.030     | 54.154 | 0.462     | 0.986  | 0.116     | 17.386 | 0.108     | 41.825 | -0.249    | 0.307  |
| ABI1          | 0.220     | 0.171  | 0.721     | 0.944  | 0.149     | 14.770 | -0.100    | 19.971 | -0.392    | 0.166  |
| ABI3          | 0.174     | 37.036 | -0.286    | 1.086  | -0.103    | 36.892 | 0.145     | 32.497 | 0.606     | 0.021  |
| ABL2          | 0.233     | 0.529  | 0.652     | 0.569  | 0.141     | 54.331 | 0.834     | 0.573  | 0.312     | 36.831 |
| ABLIM2        | -0.038    | 55.170 | -0.284    | 5.829  | 0.267     | 2.056  | 0.221     | 8.987  | 0.512     | 0.066  |
| ABLIM3        | -0.092    | 29.668 | -0.507    | 0.305  | -0.142    | 20.025 | 0.198     | 3.866  | 0.197     | 2.886  |
| ACAD10        | 0.200     | 0.780  | 0.352     | 6.703  | 0.015     | 58.928 | 0.910     | 0.061  | 0.118     | 43.175 |
| Acan          | -0.407    | 0.171  | -0.242    | 2.859  | -0.351    | 9.255  | 0.190     | 23.450 | -0.146    | 33.879 |
| ACAT2         | -0.103    | 44.812 | -0.478    | 5.829  | 0.204     | 8.121  | -0.773    | 0.061  | 0.486     | 0.021  |
| ACBD3         | -1.233    | 0.052  | 0.071     | 7.537  | -0.431    | 0.092  | -0.890    | 0.061  | -0.460    | 0.021  |
| ACCS          | 0.193     | 5.928  | -0.456    | 0.935  | 0.305     | 0.240  | -0.110    | 49.358 | 0.339     | 24.398 |
| ACER2         | 0.083     | 49.540 | 0.072     | 10.404 | 0.253     | 2.056  | 0.346     | 19.971 | 0.474     | 0.021  |
| ACOT9         | 0.248     | 7.743  | 0.626     | 0.514  | -0.189    | 2.311  | 0.049     | 50.493 | -0.430    | 0.119  |
| ACP1          | -0.150    | 49.540 | 0.672     | 0.445  | -0.301    | 26.120 | 0.533     | 0.292  | -0.773    | 0.471  |
| ACP2          | -0.258    | 12.647 | 0.470     | 1.772  | -0.162    | 33.124 | -0.406    | 19.971 | -0.664    | 0.021  |
| ACSL1         | -0.326    | 15.278 | 0.503     | 0.877  | -0.348    | 1.556  | -1.019    | 0.061  | 0.295     | 24.398 |
| ACTG2         | -0.259    | 0.170  | 0.390     | 0.595  | 0.565     | 4.733  | -0.289    | 41.825 | -0.274    | 24.398 |
| ACTL6A        | 0.260     | 1.431  | 0.753     | 0.514  | -0.036    | 56.823 | -0.314    | 27.828 | -0.135    | 31.624 |
| ACTR3B        | 0.697     | 0.052  | 0.969     | 0.569  | -0.159    | 2.659  | -0.337    | 11.241 | -0.411    | 6.001  |
| ACVR2A        | 0.136     | 44.812 | 0.574     | 0.300  | -0.537    | 2.311  | 0.487     | 16.936 | -0.757    | 0.021  |
| ADA           | -0.167    | 1.431  | -0.262    | 5.829  | 0.054     | 56.823 | 0.026     | 53.829 | 0.622     | 0.391  |
| ADAM17        | -0.237    | 5.928  | 0.279     | 7.537  | -0.275    | 3.068  | -0.913    | 1.210  | -0.400    | 0.021  |
| ADAM19        | 0.137     | 15.278 | 0.326     | 1.772  | 0.077     | 54.331 | -0.774    | 1.617  | -0.497    | 0.891  |
| ADAM8         | 0.106     | 44.812 | 0.465     | 0.569  | 0.387     | 4.053  | -0.444    | 32.497 | 0.153     | 31.624 |
| ADAMTS1       | -0.043    | 56.513 | -0.173    | 11.783 | -0.438    | 3.475  | -0.721    | 0.906  | 0.118     | 44.203 |
| ADAMTS2       | -0.969    | 0.052  | -0.911    | 0.986  | 0.138     | 41.103 | 0.509     | 1.210  | 0.781     | 0.045  |
| ADAMTS20      | 0.298     | 0.666  | 0.418     | 0.300  | 0.173     | 26.120 | 0.164     | 13.893 | 0.121     | 43.008 |
| ADAMTS7       | -0.191    | 18.587 | 0.240     | 1.086  | 0.163     | 54.331 | -0.191    | 32.497 | 1.174     | 0.021  |
| ADAMTS9       | -0.585    | 0.052  | -0.902    | 2.859  | 0.134     | 29.328 | -0.079    | 32.497 | 0.140     | 40.660 |
| ADAR2         | 0.834     | 0.052  | -0.520    | 2.859  | 0.558     | 0.092  | -0.269    | 23.450 | -0.341    | 0.391  |
| ADAT1         | 0.125     | 44.812 | -0.578    | 0.228  | 0.161     | 0.456  | -0.556    | 0.109  | 0.307     | 24.398 |
| ADCY1         | -0.200    | 25.771 | 0.558     | 0.514  | -0.069    | 56.823 | -0.292    | 13.893 | -0.427    | 0.993  |
| ADCY4         | -0.168    | 44.812 | 0.208     | 4.122  | 0.384     | 22.899 | -0.193    | 32.497 | 0.939     | 0.021  |
| ADCY7         | -0.120    | 44.812 | 0.575     | 11.783 | -0.334    | 10.694 | 0.814     | 0.506  | 1.133     | 0.084  |
| ADCYAP1       | 0.103     | 44.812 | -0.213    | 4.122  | 0.359     | 2.056  | -0.545    | 0.341  | -0.139    | 33.879 |
| ADI1          | -0.055    | 52.827 | -0.602    | 0.107  | 0.103     | 20.025 | -0.022    | 55.172 | -0.251    | 0.166  |
| ADM           | 0.282     | 0.052  | -0.219    | 0.514  |           |        | -0.480    | 0.250  | -0.068    | 36.831 |
| ADNP2         | 0.474     | 0.511  | 0.428     | 0.877  | -0.181    | 3.475  | 0.098     | 11.241 | -0.059    | 38.751 |
| ADORA2A       | -0.664    | 0.511  | -0.272    | 3.009  | 0.134     | 54.331 | 0.199     | 19.971 | 0.130     | 14.822 |
| ADRA2A        | -0.152    | 3.157  | -0.207    | 5.829  | 0.323     | 0.856  | 0.280     | 0.573  | 0.735     | 0.021  |
| ADRB1         | -0.140    | 9.997  | 0.678     | 0.514  | 0.102     | 54.331 | 0.247     | 0.121  | -0.036    | 37.824 |
| ADRBK1        | 0.222     | 0.529  | 0.484     | 1.029  | 0.715     | 1.819  | 0.195     | 23.450 | 0.583     | 0.021  |
| AFAP1L1       | -0.138    | 1.936  | -0.478    | 0.784  | 0.371     | 3.068  | -0.505    | 13.893 | 0.436     | 0.166  |
| AFF3          | 0.189     | 21.797 | 0.527     | 0.514  | -0.196    | 36.892 | -0.173    | 27.828 | -0.119    | 37.824 |
| AFF4          | -0.714    | 0.052  | -0.576    | 2.773  | -0.409    | 10.694 | 0.388     | 27.828 | 0.529     | 0.993  |
| AFG3L1        | -0.067    | 52.218 | 0.528     | 0.445  | -0.208    | 9.255  | 0.378     | 1.332  | 0.375     | 11.001 |
| AFP           | -0.061    | 57.109 | -0.771    | 1.086  | -0.558    | 22.899 | 0.964     | 0.061  | 1.856     | 0.021  |
| AFTPH         | -0.136    | 49.540 | 0.253     | 6.703  | -0.309    | 0.440  | 0.741     | 2.415  | -0.714    | 0.021  |
| AGA           | 0.454     | 0.666  | 0.509     | 0.986  | -0.198    | 0.856  | 0.339     | 32.497 | 0.042     | 44.052 |
| AGBL5         | -0.418    | 0.398  | -0.304    | 3.009  | 0.153     | 33.124 | -0.064    | 41.825 | 0.628     | 0.039  |
| AGPAT1        | -0.096    | 49.540 | -0.387    | 0.784  | 0.138     | 20.025 | 0.402     | 13.893 | 0.498     | 0.021  |
| AGPAT2        | -0.061    | 49.540 | -0.103    | 9.629  | -0.265    | 14.770 | 0.409     | 4.906  | 0.777     | 0.021  |
| AGPAT9        | 0.170     | 1.431  | 0.543     | 0.107  | 0.203     | 2.311  | 1.009     | 0.061  | -0.493    | 0.021  |
| AGPS          | -0.436    | 4.284  | 0.570     | 0.107  | 0.072     | 49.127 | -0.452    | 13.893 | -0.533    | 0.391  |
| AGR2          | -0.476    | 0.052  | -0.290    | 0.986  | -0.056    | 58.611 | 0.401     | 23.450 | -0.202    | 14.822 |
| AGT           | -0.488    | 0.052  | 0.356     | 0.420  | -0.713    | 0.092  | 0.530     | 0.292  | 0.821     | 0.062  |

|               |        |        |        |        |        |        |        |        |        |        |
|---------------|--------|--------|--------|--------|--------|--------|--------|--------|--------|--------|
| AGTR1         | 0.457  | 29.668 | -0.660 | 0.180  | -0.288 | 29.328 | -0.846 | 0.061  | -0.663 | 0.021  |
| AGXT2L1       | -1.083 | 0.052  | -0.269 | 0.595  |        |        | 1.063  | 0.947  | 1.153  | 0.213  |
| AHCTF1        | 0.265  | 21.797 | 0.726  | 1.212  | 0.209  | 0.856  | 0.375  | 1.332  | -0.272 | 31.624 |
| AHCYL2        | -0.505 | 0.666  | 0.282  | 2.300  | -0.319 | 2.659  | 0.493  | 0.061  | -0.714 | 0.021  |
| AHDC1         | -0.170 | 9.997  | 0.282  | 0.354  | -0.213 | 29.328 | 0.164  | 32.497 | 0.780  | 0.021  |
| AHNAK         | -0.288 | 0.052  | -0.300 | 0.784  | 0.657  | 0.092  | -0.644 | 0.727  | 0.976  | 0.021  |
| AIF1          | -0.188 | 44.812 | -0.089 | 0.264  | -0.106 | 29.328 | 0.451  | 0.061  | 0.841  | 0.021  |
| AIFM2         | 0.377  | 44.812 | 0.427  | 0.354  |        |        | -0.215 | 0.947  | 0.220  | 24.398 |
| AIM1          | -0.508 | 0.052  |        |        | -0.142 | 54.331 | -0.171 | 52.656 | 0.517  | 11.001 |
| AK2           | -0.221 | 7.743  | -0.301 | 2.123  | 0.213  | 49.127 | -0.481 | 0.855  | -0.853 | 0.066  |
| AKAP10        | 0.321  | 0.126  | 0.594  | 0.595  | 0.387  | 2.659  | 0.146  | 23.450 | -0.427 | 0.045  |
| AKAP8         | -0.036 | 55.559 | 0.321  | 3.009  | -0.043 | 58.928 | -0.570 | 0.506  | 0.229  | 24.398 |
| AKAP9         | 0.074  | 44.812 | 0.222  | 2.773  | 0.133  | 20.025 | -0.197 | 2.913  | -0.571 | 0.021  |
| AKR1B10       | 0.092  | 49.540 | -0.384 | 2.123  | -0.260 | 0.240  | 0.747  | 0.399  | 0.951  | 0.021  |
| AKT3          | 0.114  | 37.036 | 0.266  | 5.829  |        |        | 0.619  | 0.061  | -0.296 | 0.471  |
| ALAS2         | -0.192 | 4.284  | -0.408 | 0.944  | -0.164 | 22.899 |        |        | 0.625  | 0.119  |
| ALDH16A1      | -0.061 | 57.109 | -0.650 | 0.514  | 0.749  | 0.092  | -0.032 | 49.358 | 0.555  | 0.119  |
| ALDH1A1       | -0.146 | 55.870 | -0.116 | 4.122  | 0.256  | 0.402  | 0.115  | 32.497 | 0.425  | 0.993  |
| ALDH1A2       | -0.637 | 0.052  |        |        | -0.220 | 49.127 |        |        | 0.383  | 4.218  |
| ALDH1B1       | 0.137  | 5.928  | 0.145  | 13.299 |        |        | -0.184 | 13.893 | -0.519 | 0.021  |
| ALDH1L2       | 0.056  | 44.812 | -0.380 | 0.859  | 0.118  | 33.124 | -0.242 | 19.971 | 0.370  | 24.398 |
| ALDH3B1       | -0.174 | 37.036 | -0.230 | 2.859  | 0.647  | 0.724  | 0.294  | 0.727  | 0.646  | 0.269  |
| ALDOC         | -0.040 | 49.540 | -0.512 | 4.122  | 0.217  | 20.025 | 0.111  | 23.450 | 0.587  | 0.021  |
| ALOX12B       | 0.072  | 54.154 | -0.283 | 0.784  | 0.471  | 0.092  | 0.166  | 1.332  | 0.654  | 0.391  |
| ALPK3         | 0.374  | 0.052  | 0.152  | 6.703  | 0.366  | 5.705  | -0.505 | 27.828 | -0.344 | 0.039  |
| ALS2          | 0.274  | 0.171  | -0.423 | 2.773  | -0.164 | 14.770 | -0.686 | 0.250  | -0.336 | 0.119  |
| AMHR2         | 0.604  | 0.126  | 0.299  | 5.829  | 0.519  | 3.068  | -0.495 | 32.497 | 0.007  | 44.052 |
| AMIGO2        | -0.430 | 12.647 | 0.326  | 1.029  | -1.051 | 0.724  |        |        | -0.577 | 24.398 |
| AMPH          | -0.604 | 0.052  |        |        | -0.372 | 0.092  | 0.056  | 47.420 | 0.093  | 44.052 |
| AMZ1          | -0.329 | 9.997  | 0.094  | 9.629  | 0.059  | 54.331 | 0.657  | 0.061  | 0.523  | 0.649  |
| ANAPC16       | 0.019  | 56.130 | 0.230  | 5.829  | 0.031  | 58.074 | -0.558 | 0.061  | -0.446 | 0.471  |
| ANGPTL4       | 0.091  | 44.812 | -0.197 | 8.881  | 0.169  | 49.127 | 0.211  | 0.727  | 0.610  | 0.039  |
| ANK1          | 0.441  | 0.171  | 0.253  | 4.122  | -0.219 | 9.255  | 0.430  | 0.061  | 0.234  | 14.822 |
| ANK2          | -1.015 | 0.052  | -0.467 | 6.703  | -0.661 | 0.092  | -1.733 | 0.061  | -0.439 | 0.993  |
| ANKRD11       | -0.585 | 0.052  | -0.348 | 2.773  | -0.656 | 0.092  | -0.374 | 11.241 | 0.431  | 0.649  |
| ANKRD26       | 0.547  | 5.928  | 0.244  | 0.986  | -0.640 | 0.092  | -0.687 | 0.061  | -1.114 | 0.021  |
| ANKRD44       | 0.073  | 52.827 | 0.390  | 1.772  | 0.123  | 36.892 |        |        | 0.952  | 0.021  |
| ANTXR1        |        |        | 0.561  | 0.986  | 0.098  | 33.124 | -0.538 | 1.210  | 0.493  | 0.993  |
| ANTXR2        |        |        |        |        | -0.508 | 0.819  | -0.075 | 41.825 | -0.059 | 41.878 |
| ANXA2         | -0.081 | 29.668 | 0.282  | 8.881  | 0.290  | 1.309  | -0.349 | 0.727  | 0.692  | 0.021  |
| ANXA3         | -0.332 | 12.647 | 0.404  | 1.772  | 0.395  | 0.440  | 0.181  | 41.825 | 1.000  | 0.021  |
| ANXA4         | -0.291 | 0.171  | -0.240 | 4.122  | 0.116  | 36.892 | -0.100 | 47.420 | 0.511  | 0.977  |
| ANXA5         | -0.234 | 5.928  | 0.331  | 1.212  | 0.154  | 17.386 | -0.054 | 51.354 | 0.561  | 0.269  |
| ANXA6         | -0.537 | 0.052  | 0.444  | 2.123  | -0.202 | 33.124 | 0.170  | 49.358 | -0.430 | 0.993  |
| ANXA7         | 0.151  | 15.278 | 0.455  | 5.829  | -0.263 | 14.770 | -0.243 | 0.177  | -0.530 | 0.021  |
| ANXA8/ANXA8L1 | -0.193 | 0.666  | -0.716 | 0.428  | -0.061 | 49.127 | 0.058  | 51.354 | 0.199  | 24.398 |
| AOC2          | 0.317  | 25.771 | 0.194  | 13.299 | 0.204  | 12.575 |        |        | -0.676 | 0.021  |
| AP1G1         | -0.829 | 0.170  | 0.404  | 1.457  | 0.196  | 17.386 | -0.163 | 1.332  | -0.619 | 0.021  |
| AP3M1         | 0.208  | 2.450  | -0.402 | 2.123  | -0.172 | 5.705  | 0.230  | 1.332  | -0.533 | 0.066  |
| AP3M2         | -0.172 | 49.540 | 0.321  | 1.663  | -0.242 | 36.892 | -0.128 | 41.825 | -0.579 | 0.021  |
| AP3S1         | 0.141  | 44.812 | 0.653  | 0.420  | -0.094 | 49.127 | -0.048 | 51.354 | -0.333 | 0.021  |
| APBA1         | -0.468 | 0.052  | -0.602 | 0.514  | 0.449  | 0.092  | 0.173  | 49.358 | 0.179  | 24.398 |
| APBB2         | -0.562 | 0.052  | -0.093 | 11.783 | -0.438 | 1.819  | -0.185 | 0.573  | -0.527 | 0.213  |
| APH1B         | 0.086  | 51.013 | 0.364  | 2.614  | 0.047  | 58.074 | 0.233  | 8.987  | -0.401 | 0.993  |
| APLF          | 0.301  | 0.666  | 0.346  | 1.534  | 0.122  | 49.127 | 0.663  | 0.061  | 0.319  | 11.001 |
| APLN          | -0.302 | 1.431  | -0.332 | 3.205  | 0.040  | 49.127 | -0.400 | 0.061  | -1.109 | 0.021  |
| APLNR         | 0.013  | 55.559 | -0.242 | 2.859  | 0.393  | 0.092  |        |        | -0.183 | 24.398 |
| APOBEC1       | -0.365 | 21.797 | -0.326 | 6.703  | -0.224 | 26.120 | -0.057 | 53.272 | 0.839  | 0.066  |
| APOC1         |        |        | -0.242 | 4.122  | 0.078  | 49.127 | -0.047 | 47.420 | 0.784  | 0.021  |
| APOC2         | 0.088  | 44.812 | -0.135 | 6.703  | 0.020  | 58.611 |        |        | 0.536  | 0.269  |
| APOC3         | -0.267 | 44.812 | 0.291  | 0.944  | -0.250 | 2.056  | 0.976  | 0.130  | 0.866  | 0.021  |
| APOD          | -0.461 | 2.450  | 0.542  | 1.663  | 0.099  | 41.103 |        |        | 0.603  | 0.021  |
| APOE          |        |        | 0.180  | 6.703  | 0.091  | 49.127 | 0.088  | 47.420 | 0.620  | 0.021  |
| APOL2         | 0.134  | 12.647 | -0.537 | 0.204  | 0.067  | 41.103 | 0.120  | 41.825 | 0.507  | 0.891  |
| APP           | -0.480 | 0.052  | 0.507  | 4.122  | -0.402 | 3.475  | 0.369  | 19.971 | -0.850 | 0.021  |
| AQP4          | -0.325 | 0.052  | 0.533  | 0.300  | 0.154  | 10.694 | 0.197  | 0.399  | 0.697  | 0.021  |
| ARAP2         | 0.119  | 15.278 | 0.662  | 1.534  |        |        | -0.130 | 19.971 | -0.575 | 0.045  |
| ARAP3         | 0.273  | 0.324  | 0.484  | 0.595  | -0.024 | 60.505 | 0.184  | 8.987  | 0.435  | 0.119  |

|          |        |        |        |        |        |        |        |        |        |        |
|----------|--------|--------|--------|--------|--------|--------|--------|--------|--------|--------|
| ARC      | 0.583  | 0.052  | 0.311  | 0.569  | 0.271  | 1.098  | -0.052 | 52.656 | 0.080  | 36.831 |
| ARF3     | 0.154  | 37.036 | 0.714  | 0.264  | 0.015  | 59.432 | -0.042 | 47.420 | -0.381 | 0.045  |
| ARHGEF2  | 0.259  | 1.431  | 0.577  | 1.029  | -0.124 | 9.255  | 0.316  | 5.543  | -0.317 | 0.021  |
| ARHGAP24 | -0.369 | 0.171  | -0.899 | 2.614  | -0.295 | 0.240  | -0.274 | 27.828 | -0.218 | 11.001 |
| ARHGAP26 | -0.281 | 44.812 | 0.410  | 0.107  | 0.176  | 22.899 | -1.234 | 0.061  | -0.504 | 24.398 |
| ARHGAP4  | -0.098 | 52.218 | -0.568 | 0.772  | 0.283  | 20.025 | -0.343 | 23.450 | -0.067 | 38.751 |
| ARHGAP42 | -0.208 | 2.450  | -0.522 | 0.107  | -0.511 | 0.092  | 0.130  | 32.497 | -0.646 | 0.021  |
| ARHGAP44 | 0.069  | 44.812 | 0.067  | 8.253  | -0.146 | 22.899 | -0.143 | 8.987  | -0.548 | 0.021  |
| ARHGAP5  | -0.097 | 44.812 | 0.727  | 0.514  | 0.041  | 59.793 | 0.770  | 0.250  | -0.913 | 0.084  |
| ARHGAP6  | -0.555 | 0.052  | 0.200  | 2.614  | 0.266  | 8.121  | -0.564 | 0.399  | 0.478  | 24.398 |
| ARHGAP9  | -0.081 | 52.827 | -0.219 | 2.123  | 0.161  | 29.328 | -0.031 | 53.272 | 0.521  | 0.021  |
| ARHGDIB  | 0.132  | 49.540 | 0.129  | 2.614  | 0.021  | 59.793 |        |        | 0.728  | 0.084  |
| ARHGEF2  | 0.502  | 0.930  | 0.367  | 7.537  | 0.212  | 1.556  | 0.306  | 5.543  | 0.178  | 37.824 |
| ARHGEF3  | 0.576  | 7.743  | 0.687  | 0.420  | 0.041  | 56.823 | 0.091  | 41.825 | -0.190 | 4.218  |
| ARHGEF6  | -0.620 | 0.052  | 0.645  | 1.289  | -0.486 | 0.856  | 0.527  | 19.971 | -0.460 | 0.746  |
| ARID4A   | 0.355  | 4.284  | 0.556  | 0.944  | -0.169 | 54.331 | -0.388 | 0.399  | -0.500 | 0.021  |
| ARL1     | 0.068  | 49.540 | 0.707  | 0.354  |        |        | -0.107 | 41.825 | -0.334 | 0.039  |
| ARL4C    | 0.061  | 44.812 | 0.159  | 2.773  | 0.060  | 54.331 | 0.403  | 0.292  | 0.439  | 0.891  |
| ARL4D    | 0.384  | 0.529  | 0.435  | 0.514  | 0.152  | 8.121  | 0.082  | 32.497 | -0.054 | 31.624 |
| ARL6     |        |        |        |        | -0.094 | 17.386 | 0.052  | 47.420 | -0.507 | 0.021  |
| ARMC9    | 0.140  | 21.797 | 0.405  | 0.669  | 0.249  | 33.124 | 0.372  | 0.341  | 0.216  | 33.879 |
| ARPC1B   | -0.080 | 44.812 | -0.316 | 5.829  | 0.048  | 49.127 | 0.145  | 47.420 | 0.893  | 0.021  |
| ARPP19   | 0.268  | 0.511  | 0.777  | 0.569  | 0.237  | 3.068  | 0.140  | 2.913  | 0.460  | 0.084  |
| ARPP21   | -0.257 | 44.812 | -0.206 | 0.784  | 0.341  | 22.899 | -0.148 | 5.543  | -0.441 | 0.129  |
| ARRB2    | 0.069  | 37.036 | -0.380 | 0.784  |        |        | 0.303  | 2.415  | 0.400  | 0.021  |
| ASAH2    | -0.268 | 0.666  | 0.397  | 1.663  | 0.026  | 58.928 | -0.419 | 0.353  | -0.668 | 0.021  |
| ASAP2    | 0.023  | 55.170 | 0.667  | 0.514  | 0.060  | 49.127 | 0.041  | 54.831 | -0.150 | 1.977  |
| ASB11    | -0.216 | 0.930  | 0.278  | 1.772  | -0.369 | 4.053  | -0.076 | 52.124 | -0.678 | 0.021  |
| ASPA     | -0.452 | 0.262  | -0.642 | 2.859  | -0.113 | 26.120 | -0.125 | 52.124 | -0.265 | 24.398 |
| ASPG     | -0.113 | 15.278 | -0.231 | 1.534  | 0.342  | 0.092  | 0.292  | 11.241 | 1.214  | 0.021  |
| ASPH     | -0.335 | 0.529  | 0.557  | 2.859  | -0.281 | 9.255  | 0.595  | 0.399  | -0.408 | 0.119  |
| ASXL2    | 0.139  | 44.812 | 0.415  | 3.205  | -0.431 | 0.092  | -0.994 | 1.332  | -0.230 | 6.001  |
| ATAD2    | 0.285  | 33.231 | 0.648  | 0.445  | -0.126 | 55.771 | 0.128  | 11.241 | 0.251  | 0.746  |
| ATAD5    | -0.356 | 0.052  | -0.197 | 0.514  | -0.240 | 17.386 | -0.098 | 41.825 | -0.632 | 0.119  |
| ATAT1    | 0.211  | 29.668 | 0.129  | 6.703  | 0.290  | 0.641  | -0.447 | 13.893 | 0.466  | 0.021  |
| ATE1     | 0.068  | 51.013 | 0.205  | 0.514  | 0.602  | 0.440  | -0.451 | 4.906  | -0.438 | 0.891  |
| ATF1     | 0.210  | 33.231 | 0.677  | 0.514  | 0.112  | 49.127 | -0.284 | 5.543  | 0.817  | 0.021  |
| ATF2     | -0.607 | 0.511  | 0.593  | 0.944  | -0.403 | 8.121  | 0.446  | 0.061  | -0.917 | 0.021  |
| ATF5     | 0.021  | 54.701 | 0.386  | 1.772  | -0.021 | 59.432 | 0.039  | 51.354 | 0.509  | 0.039  |
| ATG10    | -0.129 | 33.231 | -0.293 | 5.829  | -0.224 | 2.311  | 0.202  | 4.906  | -0.516 | 0.021  |
| ATIC     | -0.234 | 51.013 | -1.479 | 0.569  | -0.524 | 0.240  | -0.106 | 51.354 | 0.168  | 36.831 |
| ATL2     | 0.204  | 2.450  | 0.420  | 0.457  | 0.402  | 3.068  | 0.297  | 4.906  | 0.080  | 39.468 |
| ATM      | 0.390  | 0.511  | -0.274 | 4.122  | 0.064  | 49.127 | -0.178 | 27.828 | -0.525 | 0.021  |
| ATMIN    | 0.171  | 37.036 | -0.358 | 2.300  | 0.088  | 26.120 | 0.131  | 41.825 | 0.706  | 0.021  |
| ATN1     | 0.020  | 55.170 | -0.390 | 5.829  | 0.129  | 49.127 | 0.183  | 41.825 | 0.589  | 0.021  |
| ATOX1    | 0.036  | 49.540 | -0.158 | 5.829  | -0.203 | 1.819  | -0.698 | 0.061  | 0.167  | 31.624 |
| ATP13A3  | -1.216 | 0.052  | 0.815  | 0.514  | -0.096 | 54.331 | 0.072  | 52.656 | 0.425  | 24.398 |
| ATP1A1   | -0.076 | 49.540 | 0.129  | 11.783 | 0.285  | 4.053  | 0.143  | 47.420 | 0.529  | 0.649  |
| ATP2A1   | 0.233  | 44.812 | 0.177  | 8.881  | 0.624  | 0.092  | -0.785 | 0.061  | 0.710  | 0.993  |
| ATP2B1   | -0.141 | 9.997  | 0.692  | 1.289  | 0.170  | 12.575 | -1.063 | 3.866  | -0.730 | 0.045  |
| ATP2C1   | -0.464 | 0.171  | 0.226  | 4.122  | -0.431 | 0.240  | 0.490  | 16.936 | -0.623 | 0.021  |
| ATP2C2   |        |        | 0.287  | 1.534  | -0.258 | 41.103 | 0.773  | 0.292  | -0.083 | 40.051 |
| ATP4A    | -0.053 | 56.874 | 0.085  | 12.522 | 0.662  | 4.733  | -0.365 | 0.727  | -0.400 | 0.746  |
| ATP5F1   | 0.013  | 57.109 | 0.465  | 0.595  | -0.139 | 3.068  | 0.078  | 47.420 | 0.383  | 33.879 |
| ATP6V0A2 | 0.137  | 15.278 | 0.421  | 1.534  | 0.082  | 33.124 | 0.272  | 0.947  | 0.438  | 0.021  |
| ATP8A1   | -0.259 | 0.126  | 0.738  | 0.669  | -0.582 | 0.517  | -0.090 | 23.450 | -0.540 | 0.993  |
| ATRNL1   | -0.521 | 0.052  | 0.543  | 0.267  | -0.177 | 49.127 | -0.337 | 1.210  | 0.395  | 0.993  |
| AUH      | 0.455  | 0.052  | -0.436 | 0.784  | 0.671  | 1.556  | -0.841 | 0.947  | 0.548  | 0.021  |
| AUTS2    | 0.090  | 37.036 | -0.378 | 0.514  | 0.098  | 41.103 | 0.249  | 7.099  | -0.391 | 0.649  |
| B2M      | -0.116 | 18.587 | -0.436 | 3.205  | 0.120  | 49.127 | -0.100 | 41.825 | 0.902  | 0.021  |
| B3GALNT1 | 0.400  | 9.997  | -0.412 | 0.569  | 0.041  | 55.771 | -0.116 | 32.497 | -0.154 | 24.398 |
| B3GALT2  | 0.210  | 18.587 | 0.185  | 6.703  | -0.195 | 1.819  | 0.486  | 0.913  | 0.256  | 33.879 |
| B3GAT1   | 0.341  | 0.666  | 0.454  | 0.514  | -0.074 | 55.771 | -0.099 | 11.241 | -0.155 | 24.398 |
| B3GNT2   | 0.320  | 33.231 | 0.705  | 0.264  | 0.227  | 3.068  | -0.042 | 50.493 | -0.188 | 1.977  |
| BACE2    | 0.795  | 0.324  | 0.065  | 8.881  | -0.638 | 0.092  | -0.869 | 0.399  | 0.621  | 0.021  |
| BACH1    | -0.353 | 0.780  | -0.593 | 1.289  | -0.405 | 5.705  | 0.234  | 32.497 | -0.322 | 4.218  |
| BACH2    | -0.307 | 0.126  |        |        | -0.148 | 14.770 | -0.319 | 11.241 | -0.563 | 0.021  |
| BAD      | -0.228 | 12.647 | 0.428  | 0.514  | 0.468  | 0.092  | 0.548  | 13.893 | 0.404  | 0.993  |

|          |        |        |        |        |        |        |        |        |        |        |
|----------|--------|--------|--------|--------|--------|--------|--------|--------|--------|--------|
| BAG4     |        |        | 0.688  | 0.877  | 0.091  | 29.328 | 0.140  | 47.420 | -0.775 | 0.119  |
| BAI3     | 0.209  | 9.997  | 0.686  | 0.514  | 0.207  | 5.705  | -0.256 | 0.177  | -0.620 | 0.045  |
| BATF     | -0.379 | 2.450  | -0.191 | 2.300  | -0.132 | 41.103 | -0.705 | 1.878  | 0.696  | 0.021  |
| BATF3    |        |        | -0.133 | 0.784  | 0.202  | 36.892 | 0.216  | 32.497 | 0.443  | 0.601  |
| BAZ2A    | -0.115 | 49.540 | -0.197 | 1.534  | -0.103 | 58.406 | -0.406 | 0.292  | -0.064 | 33.879 |
| BBC3     | 0.044  | 52.827 | 0.146  | 4.122  | -0.229 | 12.575 | 0.170  | 32.497 | 0.583  | 0.021  |
| BBIP1    | 0.057  | 44.812 | 0.385  | 5.829  | -0.162 | 29.328 | -0.059 | 47.420 | -0.564 | 0.021  |
| BBS1     | 0.663  | 0.052  | 0.589  | 0.602  | -0.227 | 49.127 | -1.179 | 0.061  | -0.637 | 0.269  |
| BBS5     | 0.033  | 54.701 | 0.646  | 0.595  | -0.076 | 49.127 | 0.254  | 7.099  | -0.358 | 0.993  |
| BCKDHB   | 0.094  | 44.812 | 0.217  | 0.514  |        |        |        |        | -0.411 | 0.021  |
| BCL11A   | -0.211 | 44.812 | -0.379 | 3.009  | -0.517 | 0.998  | 0.102  | 41.825 | 0.366  | 1.977  |
| BCL2     | 0.164  | 44.812 | 0.531  | 0.929  | 0.223  | 6.932  | 0.342  | 11.241 | 0.397  | 0.213  |
| BCL2A1   | 0.322  | 1.098  | 0.354  | 0.986  | 0.011  | 60.505 |        |        | 1.952  | 0.021  |
| BCL2L2   | -0.238 | 49.540 | 0.248  | 4.122  | 0.452  | 1.098  | 0.427  | 0.250  | 0.510  | 0.021  |
| BCL3     |        |        |        |        | -0.033 | 60.231 | 0.140  | 5.543  | 0.598  | 0.021  |
| BCLAF1   | -0.767 | 0.052  | 0.532  | 1.663  | -0.399 | 10.694 | -0.480 | 23.450 | 0.499  | 24.398 |
| BDNF     | 0.181  | 0.780  | 0.866  | 0.669  | 0.225  | 2.056  | -0.118 | 19.971 | -0.942 | 0.021  |
| BDP1     | -0.198 | 0.666  | -0.816 | 0.935  | -0.102 | 54.331 | -0.791 | 1.878  | 0.413  | 0.993  |
| BECN1    | 0.185  | 12.647 | 0.537  | 1.086  | 0.032  | 58.074 | 0.100  | 47.420 | -0.417 | 0.021  |
| BEND3    | -0.256 | 0.529  | -0.425 | 3.205  | 0.059  | 54.331 | 0.431  | 0.130  | 0.088  | 39.468 |
| BEND6    | 0.088  | 21.797 | 0.405  | 5.829  | 0.012  | 59.793 | 0.196  | 2.415  | -1.175 | 0.021  |
| BFBSP2   | -0.217 | 0.171  | -0.286 | 8.253  | 0.343  | 3.068  | 0.175  | 19.971 | 0.926  | 0.021  |
| BHLHE22  | 0.116  | 25.771 | -0.138 | 4.122  | 0.345  | 1.309  | 0.387  | 4.906  | 0.603  | 0.021  |
| BHLHE22  | -0.402 | 0.930  | 1.110  | 1.029  | -0.205 | 14.770 | -0.139 | 41.825 | -0.551 | 4.218  |
| BICD2    | -0.094 | 37.036 | 0.734  | 0.595  | 0.215  | 54.331 | 0.241  | 23.450 | -0.371 | 0.119  |
| BIN1     | -0.508 | 0.052  | 0.499  | 2.859  | -0.110 | 26.120 | -0.486 | 32.497 | -0.405 | 0.977  |
| BIRC5    | 0.040  | 53.690 | -0.134 | 8.881  | 0.296  | 0.659  | -0.033 | 52.124 | 0.523  | 0.269  |
| BIRC6    | -0.246 | 0.666  | -0.419 | 0.223  | 0.067  | 54.331 |        |        | -0.025 | 39.468 |
| BLCAP    |        |        | -0.217 | 5.829  | 0.094  | 58.074 | 0.409  | 41.825 | 0.435  | 0.977  |
| BLNK     | -0.239 | 0.511  | -0.161 | 6.703  | -0.172 | 49.127 | -0.196 | 23.450 | 0.489  | 0.891  |
| BLVRB    | 0.212  | 5.928  |        |        | 0.093  | 33.124 | 0.055  | 49.358 | 0.560  | 0.119  |
| BLZF1    | 0.087  | 51.013 | -0.318 | 0.354  | 0.313  | 0.440  | -0.310 | 0.947  | -0.653 | 0.021  |
| BMF      | -0.075 | 33.231 | -0.727 | 3.205  | -0.046 | 56.823 | -0.588 | 1.878  | 1.246  | 0.021  |
| BMP2K    | -0.507 | 0.052  | -0.967 | 0.514  | 0.123  | 54.331 | 0.521  | 23.450 | 0.857  | 0.021  |
| BMP6     | -0.306 | 21.797 | -0.122 | 0.784  | 0.464  | 0.092  | -0.535 | 0.061  | 0.084  | 35.531 |
| BMP7     | -0.301 | 5.928  |        |        | 0.505  | 3.068  | 0.409  | 0.332  | 0.231  | 6.001  |
| BMPER    | 0.130  | 44.812 | -0.284 | 8.253  | -0.388 | 41.103 | 0.370  | 47.420 | -1.108 | 0.021  |
| BMPR2    | -0.661 | 0.052  | 0.377  | 1.663  | -0.635 | 0.856  | -0.275 | 0.109  | -0.214 | 8.002  |
| Bnip3    | 0.043  | 54.154 | 0.350  | 2.614  | -0.136 | 22.899 | -0.057 | 47.420 | -0.592 | 0.021  |
| BPNT1    | 0.087  | 49.540 | 0.403  | 0.595  | 0.130  | 49.127 | 0.074  | 49.358 | 0.212  | 24.398 |
| BRCA1    | 0.450  | 0.324  |        |        | 0.194  | 41.103 | -0.457 | 2.415  | -0.142 | 33.879 |
| BRDT     | 0.247  | 3.157  | 0.505  | 0.859  | 0.112  | 22.899 | 0.208  | 41.825 | -0.088 | 33.879 |
| BTAf1    |        |        | 0.619  | 4.122  | 0.089  | 20.025 |        |        | -0.415 | 0.039  |
| BTBD3    | 0.057  | 51.013 | 0.287  | 11.783 | -0.205 | 26.120 | -0.334 | 0.250  | -1.074 | 0.021  |
| BTBD9    | 0.192  | 33.231 | 0.217  | 1.663  | 0.105  | 17.386 | 0.433  | 1.878  | -0.867 | 0.307  |
| BTG2     | -0.626 | 0.052  | 0.500  | 0.180  | -0.355 | 26.120 | 0.559  | 13.893 | 0.206  | 36.831 |
| BTK      | -0.487 | 2.450  | -0.499 | 0.595  | -0.184 | 3.068  | 0.849  | 2.913  | 1.095  | 0.021  |
| BUB3     | -0.945 | 0.171  | 0.253  | 0.514  | -0.409 | 49.127 | -0.421 | 11.241 | 0.151  | 11.001 |
| BYSL     | 0.264  | 2.450  | -0.310 | 0.514  | 0.082  | 33.124 | 0.171  | 19.971 | 0.469  | 0.021  |
| BZW1     | 0.289  | 4.284  | 0.574  | 0.784  | -0.285 | 2.311  | -0.211 | 2.913  | -0.448 | 0.021  |
| C10orf54 | -0.191 | 44.812 | 0.145  | 3.009  | -0.143 | 54.331 | 0.288  | 41.825 | 0.705  | 0.021  |
| C10orf81 | 0.530  | 0.262  | 0.365  | 2.123  | 0.423  | 8.121  | 0.060  | 47.420 | 0.656  | 0.021  |
| C12orf35 | -0.204 | 0.666  | 0.370  | 0.784  | -0.416 | 0.092  | 0.070  | 47.420 | 0.096  | 31.624 |
| C12orf5  | 0.146  | 44.812 | 0.352  | 1.086  | -0.302 | 2.311  | 0.493  | 0.061  | -0.537 | 0.021  |
| C12orf51 | -0.595 | 0.262  | -0.228 | 9.629  | -0.606 | 0.092  | 0.245  | 1.210  | 0.598  | 0.045  |
| C16orf45 | -0.474 | 0.171  | -0.123 | 4.122  | -0.480 | 0.281  | 0.126  | 41.825 | 0.174  | 8.002  |
| C16orf62 | 0.503  | 0.284  | 0.187  | 6.703  | 0.231  | 4.733  | 0.114  | 27.828 | 0.222  | 14.822 |
| C16orf74 | 0.059  | 49.540 |        |        | 0.198  | 2.056  | -0.088 | 47.420 | 0.424  | 0.193  |
| C16orf88 | 0.691  | 0.052  | 0.276  | 1.029  | 0.067  | 57.395 | 0.597  | 0.341  | 0.211  | 14.822 |
| C17orf59 | 0.264  | 0.262  | 0.211  | 8.253  | 0.270  | 17.386 | 0.531  | 19.971 | -0.801 | 0.021  |
| C17orf70 | 0.331  | 0.262  | -0.134 | 2.859  | 0.049  | 54.331 | -0.510 | 0.061  | -0.617 | 0.021  |
| C19orf12 | 0.030  | 54.701 | 0.131  | 0.514  | 0.088  | 41.103 | 0.085  | 41.825 | 0.482  | 0.084  |
| C1GALT1  | 0.207  | 0.930  | 0.659  | 0.514  | -0.063 | 49.127 | -0.184 | 23.450 | -0.424 | 0.119  |
| C1orf159 | 0.058  | 54.154 | 0.480  | 1.772  | 0.077  | 41.103 | 0.196  | 41.825 | -0.484 | 0.021  |
| C1orf168 | 0.059  | 53.690 | 0.085  | 6.703  | -0.354 | 33.124 | -0.551 | 5.543  | -0.722 | 0.649  |
| C1orf190 | 0.314  | 0.126  | 0.420  | 1.663  | 0.061  | 54.331 | 0.511  | 0.061  | 0.457  | 0.119  |
| C1orf38  | 0.059  | 49.540 | -0.290 | 0.877  | 0.406  | 0.517  | -0.136 | 13.893 | 1.118  | 0.021  |
| C1QA     | 0.047  | 56.130 |        |        | 0.116  | 5.705  | -0.074 | 27.828 | 1.066  | 0.021  |

|           |        |        |        |        |        |        |        |        |        |        |
|-----------|--------|--------|--------|--------|--------|--------|--------|--------|--------|--------|
| C1QB      |        |        | -0.340 | 2.859  | 0.059  | 49.127 | 0.086  | 32.497 | 0.870  | 0.021  |
| C1QC      | 0.023  | 56.513 |        |        | 0.133  | 9.255  | 0.255  | 1.878  | 1.141  | 0.021  |
| C1QTNF5   | -0.298 | 0.529  | -0.236 | 5.829  | 0.138  | 12.575 | -0.180 | 1.617  | 0.462  | 0.129  |
| C20orf194 | 0.575  | 0.780  | 0.499  | 2.614  | 0.389  | 8.121  | -0.508 | 8.987  | 0.892  | 0.993  |
| C20orf94  | -0.050 | 52.827 | 0.248  | 2.123  | 0.110  | 49.127 | -0.316 | 1.878  | 0.576  | 0.021  |
| C21orf91  | -0.296 | 52.218 | -0.659 | 1.663  | -0.223 | 9.255  | 0.907  | 0.061  | -0.567 | 0.891  |
| C3        | -0.152 | 37.036 | -0.134 | 5.829  | -0.086 | 41.103 | 0.052  | 47.420 | 1.218  | 0.021  |
| C3orf67   | -0.436 | 0.398  | -0.254 | 2.614  | 0.088  | 49.127 | 0.061  | 47.420 | 0.653  | 0.021  |
| C4B       | 0.058  | 51.013 | 0.276  | 1.772  | 0.254  | 2.311  | 0.539  | 0.855  | 0.595  | 0.021  |
| C4orf19   | 0.227  | 21.797 | -0.402 | 0.986  | -0.079 | 55.771 | 0.242  | 47.420 | 0.688  | 0.021  |
| C4orf33   | 0.355  | 0.398  | 0.133  | 5.829  | -0.329 | 3.475  | 0.436  | 0.177  | 0.400  | 0.045  |
| C4orf43   | 0.278  | 25.771 | 0.527  | 0.300  | 0.041  | 54.331 | 0.152  | 19.971 | -0.236 | 0.746  |
| C6orf222  | 0.107  | 44.812 | 0.196  | 2.773  | 0.540  | 8.819  | 0.366  | 4.906  | 0.113  | 40.051 |
| C6orf35   | 0.231  | 1.098  | 0.345  | 6.703  | 0.433  | 3.068  | -0.319 | 32.497 | -0.789 | 0.039  |
| C7orf36   | -0.545 | 0.171  | 0.797  | 1.212  | -0.273 | 12.575 | -1.584 | 0.061  | -0.449 | 0.021  |
| C7orf57   | 0.165  | 0.666  | -0.127 | 4.122  | -0.259 | 36.892 | -0.551 | 0.121  | 0.214  | 33.879 |
| C7orf60   | 0.069  | 49.540 | 0.755  | 0.514  | 0.073  | 36.892 | -0.222 | 19.971 | -0.502 | 0.391  |
| C8orf34   | -0.047 | 49.540 | -0.201 | 0.784  | -0.170 | 33.124 | -0.447 | 0.061  | -0.607 | 0.021  |
| C8orf4    | 0.103  | 44.812 | -0.378 | 3.205  | -0.315 | 5.705  | 0.215  | 41.825 | 0.666  | 0.213  |
| C9orf71   | 0.189  | 0.780  | -0.231 | 3.205  | 0.200  | 17.386 | 0.164  | 47.420 | 0.716  | 0.021  |
| CA13      | 0.567  | 0.170  | 0.870  | 0.107  |        |        |        |        | -0.097 | 38.751 |
| CA5B      | -0.301 | 9.997  |        |        | 0.226  | 3.068  | -0.367 | 4.906  | 0.503  | 0.391  |
| CAB39     | 0.145  | 37.036 | 0.621  | 2.123  | -0.126 | 36.892 |        |        | -0.326 | 0.021  |
| CACNA1B   | 0.084  | 49.540 | 0.575  | 0.986  | 0.158  | 3.068  | 0.321  | 0.130  | -0.380 | 0.269  |
| CACNA1C   | 0.165  | 5.928  | 0.332  | 0.986  | -0.269 | 22.899 | 0.689  | 1.332  | 0.765  | 0.066  |
| CACNA1E   | -0.305 | 18.587 | -0.315 | 5.829  | 0.121  | 14.770 |        |        | -0.429 | 0.269  |
| CACNA2D1  | -0.545 | 0.398  | 0.403  | 5.829  | -0.372 | 1.309  | -0.826 | 0.109  | -0.264 | 1.977  |
| CACNG2    | 0.245  | 4.284  | -0.478 | 0.514  | 0.359  | 3.475  | -0.724 | 0.399  | 0.661  | 0.307  |
| CACNG5    | -0.709 | 0.052  |        |        | -0.642 | 10.694 |        |        | -0.476 | 24.398 |
| CADPS2    | -0.200 | 5.928  | 0.856  | 0.986  | -0.115 | 33.124 | 0.383  | 11.241 | 0.421  | 0.471  |
| CALB2     | -0.368 | 0.171  | -0.447 | 0.180  | -0.508 | 0.281  | 0.471  | 0.121  | 0.395  | 0.391  |
| CALCRL    | -0.521 | 0.052  | -0.226 | 4.122  | -0.481 | 0.092  | 0.364  | 41.825 | -0.263 | 24.398 |
| Cald1     | -0.168 | 21.797 | -0.092 | 11.783 | -0.344 | 3.068  | -0.291 | 19.971 | -0.382 | 0.746  |
| Calm1     | 0.088  | 44.812 | 0.502  | 0.300  | -0.136 | 33.124 | -0.154 | 1.332  | -0.493 | 0.084  |
| CAMK1     | 0.087  | 12.647 | 0.494  | 0.829  | 0.278  | 0.724  | -0.369 | 27.828 | 0.315  | 6.001  |
| CAMK2D    | -0.416 | 3.157  | 0.367  | 3.009  | 0.995  | 0.092  | 0.271  | 0.121  | 0.298  | 31.624 |
| CAMK4     | -0.201 | 44.812 | 0.270  | 0.445  | -0.508 | 0.092  | -0.591 | 0.353  | -0.754 | 0.039  |
| CAMKMT    | -0.056 | 57.109 | 0.196  | 11.783 | -0.284 | 3.068  | -0.416 | 0.109  | -0.163 | 37.824 |
| CAMTA1    | 0.045  | 49.540 | 0.101  | 7.537  | -0.069 | 58.074 | -0.146 | 5.543  | -0.436 | 0.891  |
| CANT1     | 0.115  | 37.036 | -0.514 | 0.223  | 0.160  | 6.932  | 0.145  | 47.420 | 0.414  | 24.398 |
| CAP1      | -0.289 | 0.170  | -0.577 | 0.986  | -0.248 | 22.899 | -0.166 | 11.241 | -0.492 | 0.021  |
| CAPG      | -0.077 | 57.367 | -0.164 | 2.859  | -0.108 | 33.124 | 0.608  | 0.061  | 0.860  | 0.021  |
| CAPN3     | 0.317  | 21.797 | 0.440  | 0.663  | 0.035  | 58.074 | -0.032 | 53.272 | 0.382  | 4.218  |
| CAPSL     | -0.313 | 0.511  | 0.326  | 0.174  | 0.130  | 58.406 | 0.269  | 47.420 | -0.520 | 0.021  |
| CARD6     | -0.403 | 2.450  |        |        | -0.167 | 54.331 | 0.606  | 0.061  | -0.235 | 0.391  |
| CARKD     | -0.436 | 0.052  | 0.204  | 5.829  | -0.290 | 4.733  | -0.218 | 7.099  | -0.286 | 0.649  |
| CARTPT    | -0.628 | 0.780  | -0.148 | 4.122  | 0.191  | 12.575 | -0.177 | 2.415  | -0.328 | 24.398 |
| CASP12    | 0.117  | 44.812 | -0.148 | 4.122  | 0.113  | 49.127 | -0.111 | 27.828 | 0.678  | 0.021  |
| CASP8     | 0.115  | 51.013 |        |        | -0.050 | 54.331 | -0.293 | 19.971 | 0.433  | 0.901  |
| CAV1      | -0.182 | 4.284  | -0.433 | 2.773  | 0.118  | 33.124 | -0.152 | 23.450 | 0.473  | 0.307  |
| CAV2      | 0.455  | 1.098  | 0.455  | 0.445  | 0.477  | 4.053  | 0.259  | 47.420 | 0.566  | 0.021  |
| CBLN1     | -0.352 | 0.398  | -0.102 | 4.122  | 0.292  | 0.240  | 0.338  | 0.573  | 0.464  | 0.021  |
| CBX3      | -0.441 | 0.398  | -0.582 | 2.123  | -0.463 | 0.092  | 0.255  | 49.358 | 0.418  | 0.021  |
| CBX8      | 0.166  | 12.647 | -0.370 | 5.829  | 0.194  | 0.856  | -0.322 | 47.420 | 0.688  | 0.045  |
| CCBE1     | -0.548 | 0.171  | 0.211  | 5.829  | 0.027  | 58.406 | 0.227  | 11.241 | -1.500 | 0.021  |
| CCBL1     | 0.107  | 37.036 | -0.449 | 0.935  | 0.031  | 56.823 | -0.044 | 49.358 | 0.124  | 37.824 |
| CCDC102A  |        |        | 0.108  | 5.829  | -0.403 | 0.856  | -0.097 | 47.420 | 0.926  | 0.021  |
| CCDC109B  | 0.037  | 54.154 | 0.451  | 0.122  | 0.107  | 36.892 | 0.071  | 41.825 | 0.516  | 31.624 |
| CCDC19    | -0.415 | 9.997  | 0.295  | 0.602  | -0.139 | 9.255  | 0.371  | 2.913  | -0.402 | 0.891  |
| CCDC25    | -0.543 | 0.052  | 0.695  | 1.457  | -0.342 | 1.098  | 0.274  | 2.415  | 0.249  | 24.398 |
| CCDC64    | 0.280  | 33.231 | -0.098 | 3.205  | 0.051  | 54.331 | -0.492 | 0.947  | -0.246 | 1.193  |
| CCDC80    | -0.150 | 1.098  | -0.103 | 10.404 | 0.324  | 0.659  | -0.134 | 52.124 | 0.628  | 0.021  |
| CCDC85A   | -0.587 | 0.511  | -0.875 | 1.086  | -0.272 | 2.659  | 0.615  | 11.241 | -0.369 | 0.993  |
| CCDC88A   | -0.484 | 0.052  | -0.687 | 2.123  | -0.382 | 6.932  | -0.254 | 32.497 | -0.555 | 0.021  |
| CCHCR1    | 0.255  | 33.231 |        |        | 0.212  | 2.056  | 0.455  | 0.177  | -0.192 | 31.624 |
| CCKBR     | -0.476 | 0.052  | -0.128 | 12.522 | 0.365  | 0.659  |        |        | -0.588 | 0.891  |
| CCL13     | -0.378 | 4.284  | 0.175  | 4.122  | 0.247  | 2.659  | 0.116  | 41.825 | 1.205  | 0.021  |
| CCL2      | -0.526 | 0.093  | -0.357 | 2.773  | -0.425 | 1.819  | 0.196  | 23.450 | 1.683  | 0.021  |

|               |        |        |        |        |        |        |        |        |        |        |
|---------------|--------|--------|--------|--------|--------|--------|--------|--------|--------|--------|
| CCL3          |        |        |        |        |        |        |        | 1.616  | 0.021  |        |
| CCL4          | -0.277 | 37.036 | -0.946 | 1.772  | 0.316  | 2.659  | 0.231  | 52.656 | 1.491  | 0.021  |
| CCL5          | -0.275 | 18.587 | -0.125 | 5.829  | -0.343 | 20.025 | -0.081 | 47.420 | 0.595  | 0.021  |
| Ccl6          |        |        |        |        | -0.216 | 2.659  | 0.700  | 0.353  | 1.754  | 0.021  |
| Ccl9          | -0.167 | 37.036 | -0.346 | 2.123  | -0.318 | 0.440  | 0.120  | 41.825 | 1.317  | 0.021  |
| CCNB1IP1      | -0.262 | 52.218 |        |        | 0.266  | 6.932  | 0.203  | 47.420 | 0.605  | 0.021  |
| CCND1         | 0.051  | 52.218 | 0.310  | 3.205  | 0.231  | 1.819  | 0.215  | 0.353  | 0.702  | 0.129  |
| CCND2         | 0.412  | 0.052  | 0.451  | 1.457  | -0.262 | 33.124 |        |        | 0.051  | 42.212 |
| CCNG1         | 0.073  | 44.812 | 0.752  | 0.986  | 0.108  | 54.331 | 0.251  | 0.250  | -0.307 | 2.886  |
| CCNI          | -0.425 | 0.052  | 0.258  | 0.514  | -0.212 | 10.694 | 0.425  | 41.825 | 0.313  | 0.649  |
| CCNJL         | -0.154 | 29.668 | 0.336  | 3.009  | -0.324 | 2.311  | -0.242 | 8.987  | -0.674 | 0.993  |
| CCNL1         | -0.538 | 0.052  | 0.648  | 2.614  | -0.071 | 41.103 | 0.743  | 0.061  | 0.211  | 24.398 |
| CCNL2         | 0.410  | 0.930  | 0.605  | 0.602  | -0.087 | 41.103 | -0.244 | 0.727  | -0.364 | 0.119  |
| CCR5          | -0.076 | 44.812 | 0.405  | 0.445  |        |        |        |        | -0.720 | 0.021  |
| CCR6          | 0.151  | 1.936  | -0.209 | 3.009  |        |        | -0.468 | 0.061  | 0.106  | 31.624 |
| CCR9          | -0.056 | 44.812 | -0.403 | 0.986  | 0.035  | 56.823 |        |        | -0.189 | 24.398 |
| CCRL2         | -0.153 | 3.157  | 0.320  | 0.514  | -0.249 | 3.068  | 1.121  | 0.061  | 1.139  | 0.021  |
| CD14          | 0.162  | 21.797 | -0.101 | 6.703  |        |        | -0.493 | 0.061  | 1.171  | 0.021  |
| CD1D          | 0.434  | 21.797 | 0.936  | 0.107  | 0.054  | 55.771 | -0.229 | 51.354 | 0.543  | 0.977  |
| CD248         | 0.067  | 52.218 | -0.110 | 12.522 | 0.143  | 17.386 | 0.431  | 0.506  | 0.256  | 0.891  |
| CD300A        | 0.243  | 1.098  | -0.520 | 0.595  | -0.369 | 1.556  | 0.847  | 0.947  | 1.242  | 0.021  |
| CD37          | -0.075 | 44.812 | -0.588 | 0.514  | 0.210  | 17.386 | 0.105  | 49.358 | 0.742  | 0.021  |
| CD44          | -0.198 | 54.701 | 0.185  | 3.205  | -0.428 | 0.092  | -0.554 | 1.878  | 1.940  | 0.021  |
| CD48          | -0.106 | 57.293 | 0.073  | 13.299 | 0.420  | 0.856  | -0.877 | 0.250  | 1.419  | 0.021  |
| CD52          | -0.088 | 49.540 |        |        | 0.189  | 49.127 |        |        | 1.200  | 0.021  |
| CD59          | 0.595  | 0.171  |        |        | 0.401  | 0.856  | -0.702 | 0.061  | -0.954 | 0.021  |
| CD5L          | -0.086 | 44.812 | -0.298 | 4.122  | -0.064 | 54.331 | -0.507 | 2.415  | 0.929  | 0.129  |
| CD6           | 0.116  | 37.036 | -0.223 | 3.205  | 0.488  | 0.440  | -0.064 | 41.825 | -0.155 | 24.398 |
| CD63          | -0.186 | 7.743  | 0.297  | 0.602  | 0.069  | 33.124 | -0.079 | 49.358 | 0.686  | 0.021  |
| CD68          | -0.170 | 49.540 | -0.101 | 7.537  | 0.312  | 2.056  | 0.134  | 8.987  | 1.205  | 0.021  |
| CD74          | -0.138 | 44.812 | -0.361 | 0.569  | 0.177  | 2.311  | 0.025  | 55.172 | 0.879  | 0.021  |
| CD79B         |        |        | 0.239  | 0.514  |        |        |        |        | 0.661  | 0.021  |
| CD82          | 0.192  | 12.647 |        |        | 0.118  | 4.053  | 0.394  | 0.061  | 0.541  | 0.649  |
| CD86          |        |        | -0.125 | 8.881  | 0.406  | 0.641  | 0.252  | 19.971 | 1.012  | 0.021  |
| CD9           | -0.294 | 0.171  | 0.426  | 1.086  | -0.120 | 49.127 | 0.425  | 11.241 | 1.074  | 0.021  |
| Cd99          | -0.174 | 1.098  | -0.374 | 3.009  | -0.132 | 54.331 | 0.213  | 11.241 | 0.435  | 0.021  |
| CDAN1         | -0.066 | 44.812 | 0.283  | 2.614  | 0.032  | 57.395 | -0.084 | 19.971 | 0.778  | 0.021  |
| CDC20         | -0.310 | 2.450  | -0.894 | 2.123  | -0.090 | 49.127 |        |        | 0.607  | 0.993  |
| CDC40         | -0.918 | 0.052  | 0.471  | 0.595  | -0.241 | 0.641  | -0.920 | 0.061  | -0.471 | 0.045  |
| CDC42         | 0.078  | 44.812 | 0.643  | 0.514  | -0.152 | 22.899 | -0.174 | 19.971 | -0.431 | 0.021  |
| CDC42BPA      | 0.164  | 44.812 | -0.293 | 2.773  | 0.170  | 12.575 | -0.086 | 41.825 | 0.587  | 0.307  |
| CDC42EP1      | -0.151 | 37.036 | -0.191 | 0.784  | 0.032  | 55.771 | 0.322  | 16.936 | 0.598  | 0.039  |
| CDC42EP3      | -0.735 | 0.093  | 0.361  | 4.122  | -0.189 | 49.127 | 0.082  | 54.831 | 0.452  | 41.258 |
| CDC42EP4      | -0.267 | 37.036 | -0.466 | 1.534  | 0.118  | 33.124 | 0.274  | 1.210  | 0.962  | 0.021  |
| CDC42EP5      | 0.035  | 53.690 |        |        | -0.271 | 5.705  | 0.362  | 2.415  | 0.438  | 0.891  |
| CDC6          | -0.087 | 56.130 | 0.506  | 0.484  | 0.560  | 5.705  | 0.554  | 2.415  | -0.516 | 0.746  |
| CDCA4         | -0.041 | 52.218 | 0.224  | 9.629  |        |        | -0.262 | 0.177  | -0.354 | 0.993  |
| Cdca7         | 0.107  | 44.812 | 0.237  | 6.703  | -0.047 | 60.505 | -0.542 | 0.061  | -0.280 | 11.001 |
| CDH11         | -0.532 | 0.529  | -1.000 | 1.029  | -0.063 | 49.127 | 0.332  | 23.450 | -0.435 | 0.021  |
| CDH20         | 0.149  | 2.450  | 0.294  | 7.537  | 0.153  | 6.932  | 0.287  | 11.241 | 0.486  | 0.893  |
| CDH7          | -0.635 | 0.171  | 0.117  | 9.629  | 0.530  | 9.255  | -0.399 | 7.099  | -0.411 | 0.039  |
| CDK11A/CDK11B | 0.142  | 21.797 | 0.398  | 2.773  | 0.069  | 41.103 | 0.083  | 41.825 | 0.307  | 6.001  |
| CDK12         | -0.345 | 0.262  | 0.452  | 1.772  | 0.073  | 41.103 | 0.203  | 1.210  | 0.107  | 40.051 |
| CDK18         | -0.119 | 44.812 | 0.123  | 7.537  | -0.094 | 58.074 | 0.317  | 0.061  |        |        |
| CDK6          | -0.394 | 0.093  | -0.173 | 5.829  | -0.064 | 55.771 | -0.144 | 27.828 | -0.113 | 31.624 |
| CDKL5         | -0.305 | 0.529  | -0.573 | 0.445  | -0.547 | 0.092  | 0.124  | 47.420 | 0.071  | 42.369 |
| CDKN1C        | -0.616 | 0.529  |        |        | 0.140  | 54.331 | -0.798 | 0.061  | 0.088  | 33.879 |
| CDKN2AIP      | 0.266  | 0.511  | -1.228 | 1.772  | -0.447 | 5.705  | -0.716 | 4.906  | -0.397 | 0.993  |
| CDS2          | -0.159 | 44.812 | 0.545  | 1.289  | 0.106  | 54.331 | 0.461  | 0.061  | -0.326 | 0.129  |
| CEBPA         |        |        | 0.296  | 0.300  | 0.127  | 22.899 | 0.205  | 23.450 | 0.582  | 0.021  |
| CEBPB         | 0.323  | 33.231 | 0.127  | 11.093 | 0.324  | 0.641  | 0.173  | 11.241 | 0.671  | 0.066  |
| CECR6         | 0.528  | 0.052  | 0.384  | 0.514  | 0.365  | 0.402  | 0.221  | 19.971 | -0.294 | 0.746  |
| CELF2         | -0.446 | 0.052  | 0.400  | 0.514  | 0.055  | 57.395 | -0.340 | 0.855  | -0.425 | 0.166  |
| CELSR3        | 0.055  | 53.690 | 0.681  | 0.484  | 0.168  | 33.124 | 0.442  | 7.099  | 1.059  | 0.021  |
| CENPA         | 0.101  | 49.540 | -0.433 | 3.009  | 0.099  | 36.892 | -0.089 | 49.358 | 0.748  | 0.021  |
| CENPE         | -0.089 | 49.540 | -0.316 | 6.703  | -0.845 | 0.092  | 0.378  | 47.420 | -1.044 | 0.391  |
| CENPM         | -0.181 | 44.812 | 0.335  | 0.514  | -0.053 | 54.331 | 0.807  | 0.061  | -0.665 | 0.021  |
| CENTG2        | -0.132 | 15.278 | 0.261  | 1.772  | -0.249 | 12.575 | 0.201  | 3.866  | 1.089  | 0.021  |

|         |        |        |        |        |        |        |        |        |        |        |
|---------|--------|--------|--------|--------|--------|--------|--------|--------|--------|--------|
| CEP120  | 0.137  | 33.231 | -0.554 | 0.784  | 0.088  | 57.395 | -0.179 | 8.987  | -0.993 | 0.021  |
| CEP152  |        |        | -0.180 | 6.703  | -0.098 | 54.331 | -0.223 | 47.420 | -0.788 | 0.021  |
| CEP27   | -0.559 | 0.780  | 0.366  | 0.569  | -0.469 | 0.281  | -0.401 | 2.415  | -0.898 | 0.021  |
| CEP55   | -0.929 | 0.052  | -0.154 | 4.122  | 0.832  | 0.092  | 0.183  | 27.828 | -0.857 | 0.021  |
| CES5A   | -0.080 | 51.013 | 0.188  | 4.122  | 0.413  | 5.705  |        |        | 0.834  | 0.021  |
| CES7    | -0.324 | 7.743  | -0.888 | 1.086  | 0.436  | 0.517  | 0.316  | 1.210  | 0.677  | 0.993  |
| CFI     | 0.078  | 33.231 | -0.221 | 5.829  | 0.081  | 49.127 | 0.199  | 1.878  | 0.893  | 0.021  |
| CFLAR   | -0.293 | 7.743  | -0.582 | 1.289  | 0.289  | 0.641  | 0.359  | 13.893 | 0.534  | 0.269  |
| CHAT    | -0.115 | 3.157  | -0.621 | 0.773  | -0.041 | 56.823 | 0.036  | 52.656 | 0.143  | 31.624 |
| CHCHD5  | -0.144 | 44.812 | -0.599 | 2.773  | 0.082  | 54.331 | 0.488  | 0.727  | 0.031  | 31.624 |
| CHD1L   | -0.117 | 49.540 |        |        |        |        |        |        | 1.277  | 0.021  |
| CHD5    | -0.405 | 0.171  | 0.461  | 0.514  | 0.204  | 4.733  | 0.235  | 27.828 | 0.124  | 31.624 |
| CHFR    | -0.554 | 0.052  | 0.628  | 0.595  | 0.040  | 55.771 | -0.170 | 32.497 | -0.112 | 31.624 |
| CHI3L1  | -0.061 | 56.513 | -0.140 | 8.881  | 0.114  | 6.932  | 0.141  | 27.828 | 0.773  | 0.021  |
| CHIC2   | -0.101 | 33.231 | 0.549  | 0.180  | 0.045  | 58.074 | 0.034  | 52.656 | -0.018 | 41.878 |
| CHID1   | 0.258  | 7.743  | 0.508  | 0.428  | 0.093  | 41.103 | -0.034 | 55.172 | -0.026 | 40.051 |
| CHKA    | -0.233 | 0.262  | 0.612  | 2.773  | -0.281 | 0.517  | 0.174  | 41.825 | -0.440 | 0.746  |
| CHL1    | -0.344 | 29.668 | -0.865 | 0.812  | 0.248  | 0.641  | -0.153 | 13.893 | 0.228  | 24.398 |
| CHMP1B  | 0.099  | 44.812 | 0.790  | 0.944  | 0.050  | 49.127 |        |        | -0.436 | 0.021  |
| CHMP6   | 0.406  | 0.052  | -0.272 | 6.703  | 0.330  | 3.068  |        |        | 0.177  | 24.398 |
| Chn1    | 0.226  | 0.529  | 0.520  | 4.122  | -0.068 | 54.331 | 0.048  | 52.656 | -0.347 | 0.269  |
| CHPT1   | -0.322 | 7.743  | -0.316 | 2.859  | -0.118 | 49.127 | -0.584 | 0.061  | 0.190  | 14.822 |
| CHRD1   | -0.487 | 9.997  | 0.402  | 1.772  | 0.902  | 1.309  | 0.278  | 3.866  | 1.076  | 0.119  |
| CHRM1   | 0.169  | 3.157  | 0.285  | 5.829  | 0.034  | 58.074 | 0.446  | 0.727  | -0.230 | 31.624 |
| CHRM3   | 0.162  | 49.540 | -0.800 | 1.534  | -0.569 | 1.819  | 0.912  | 2.415  | -0.270 | 6.001  |
| CHRNA1  | -0.635 | 0.126  | 0.502  | 0.264  | 0.162  | 54.331 | -0.148 | 51.354 | -0.202 | 24.398 |
| CHRNA7  | -0.653 | 0.647  | -0.309 | 3.205  | 0.167  | 36.892 | -0.185 | 32.497 | 0.046  | 43.965 |
| CHST3   | -0.488 | 0.324  | -0.564 | 2.614  | -0.100 | 36.892 | 0.073  | 51.354 | 0.255  | 0.977  |
| CHTF8   | 0.171  | 18.587 | -0.129 | 3.205  | 0.458  | 1.819  | -0.299 | 23.450 | -0.450 | 0.307  |
| CIDEA   | -0.300 | 7.743  |        |        | -0.773 | 0.517  | 0.585  | 0.061  | -0.179 | 37.824 |
| CISH    | -0.103 | 52.218 | -0.143 | 4.122  | 0.025  | 59.793 | 0.093  | 51.354 | 0.449  | 0.993  |
| CIT     | -0.453 | 1.936  | 0.263  | 1.772  | 0.159  | 17.386 | -0.365 | 0.506  | 0.273  | 33.879 |
| CITED4  | -0.093 | 37.036 | -0.193 | 2.859  | 0.124  | 55.771 | 0.461  | 0.506  | 0.274  | 1.193  |
| CKLF    | 0.184  | 29.668 | -0.371 | 0.514  | -0.194 | 8.121  | 0.213  | 41.825 | 0.425  | 0.471  |
| CLDN11  |        |        | 0.163  | 0.784  |        |        | -0.163 | 41.825 | 0.478  | 0.601  |
| CLDN22  | -0.360 | 15.278 | 0.200  | 5.829  |        |        | -0.139 | 32.497 | -0.556 | 0.993  |
| CLDN23  |        |        |        |        | -0.432 | 4.733  |        |        | 0.564  | 0.021  |
| CLDND1  | -0.276 | 21.797 | 0.408  | 0.514  | 0.288  | 14.770 | -0.295 | 27.828 | 0.448  | 0.045  |
| CLEC10A |        |        | 0.539  | 0.174  |        |        | 0.383  | 47.420 | 0.532  | 0.891  |
| CLEC1B  |        |        |        |        |        |        |        |        | 0.619  | 0.802  |
| CLEC4A  |        |        |        |        |        |        | 0.287  | 41.825 | 0.560  | 0.021  |
| Clec4b1 | -0.049 | 54.701 |        |        | 0.054  | 54.331 |        |        | 0.721  | 0.045  |
| CLEC5A  | 0.155  | 4.284  | -0.165 | 13.299 | -0.088 | 36.892 | -0.405 | 7.099  | 0.962  | 0.021  |
| CLEC7A  | 0.042  | 49.540 | -0.151 | 5.829  | -0.060 | 55.771 |        |        | 1.975  | 0.021  |
| CLIC5   | -0.176 | 5.928  | -0.230 | 5.829  | 0.082  | 56.823 | -0.760 | 0.810  | 0.599  | 0.993  |
| CLIC6   | -0.830 | 0.052  | 0.215  | 6.703  | -0.306 | 4.053  | -0.275 | 49.358 | 0.205  | 43.476 |
| CLIP1   | -0.149 | 44.812 | -0.553 | 0.514  | -0.257 | 1.819  | 0.047  | 47.420 | -0.415 | 0.021  |
| CLN8    | 0.375  | 1.936  | 0.455  | 0.107  | 0.601  | 0.092  | -0.087 | 47.420 | -0.670 | 8.002  |
| CLOCK   | 0.364  | 0.171  | 0.545  | 1.772  | -0.562 | 0.092  | -0.267 | 1.878  | -0.401 | 0.993  |
| CLTC    | 0.171  | 29.668 | 0.655  | 0.784  | -0.123 | 49.127 | -0.443 | 3.866  | -0.395 | 0.993  |
| CLU     | 0.023  | 54.154 |        |        | 0.111  | 26.120 | 0.079  | 47.420 | 0.564  | 0.021  |
| CLVS1   | 0.042  | 52.218 | 0.933  | 0.107  | 0.326  | 0.517  | 0.083  | 41.825 | -0.575 | 0.021  |
| CLYBL   | 0.341  | 0.052  | 0.531  | 2.300  | 0.126  | 33.124 | -0.121 | 47.420 | -0.518 | 0.021  |
| CMAS    | 0.318  | 12.647 | 0.630  | 0.669  | 0.027  | 59.793 | -0.106 | 16.936 | -0.215 | 4.218  |
| CMBL    | -0.226 | 0.171  | 0.564  | 0.180  | -0.142 | 20.025 | 0.059  | 41.825 | -0.301 | 6.001  |
| CMKLR1  | -0.107 | 4.284  | -0.417 | 0.784  | -0.076 | 49.127 | -0.048 | 55.172 | -0.028 | 39.468 |
| Cmi5    | 0.165  | 44.812 | 0.474  | 0.784  | 0.150  | 33.124 | -0.266 | 0.855  | -0.422 | 0.993  |
| CMTM7   | 0.274  | 29.668 | 0.383  | 1.029  | 0.079  | 54.331 | 0.086  | 11.241 | 0.683  | 0.021  |
| CMTM8   | -0.095 | 56.130 | 0.113  | 4.122  | -0.528 | 0.092  | 0.495  | 0.506  | -0.267 | 1.977  |
| CNGB1   | -0.733 | 0.324  |        |        |        |        |        |        |        |        |
| CNIH3   | -0.107 | 49.540 | 0.801  | 0.669  | -0.163 | 4.053  | -0.137 | 49.358 | 0.454  | 0.021  |
| CNKSR3  | 0.130  | 44.812 | 0.521  | 0.859  | 0.221  | 33.124 | 0.159  | 32.497 | 0.272  | 31.624 |
| CNN3    | 0.074  | 44.812 | -0.171 | 5.829  | 0.184  | 0.856  | 0.039  | 51.354 | 0.605  | 0.021  |
| CNOT10  | 0.114  | 25.771 | 0.513  | 1.457  | 0.012  | 59.432 | 0.152  | 19.971 | -0.738 | 0.021  |
| CNOT3   | -0.242 | 0.171  | -0.504 | 0.944  | 0.217  | 4.053  | 0.290  | 47.420 | 0.737  | 0.891  |
| CNOT6   | 0.041  | 56.513 | -0.658 | 0.784  | 0.090  | 29.328 | -0.104 | 13.893 | -0.536 | 0.993  |
| CNTLN   | 0.038  | 49.540 | 0.428  | 0.534  | 0.404  | 4.053  | 0.066  | 47.420 | 0.304  | 24.398 |
| CNTN1   | -0.038 | 52.827 | 0.140  | 4.122  | -0.137 | 9.255  | -0.167 | 23.450 | -0.469 | 0.021  |

|          |        |        |        |        |        |        |        |        |        |        |
|----------|--------|--------|--------|--------|--------|--------|--------|--------|--------|--------|
| CNTN4    | -0.124 | 3.157  | 0.389  | 5.829  | -0.187 | 26.120 | -0.545 | 1.332  | -0.783 | 0.021  |
| COBL     | -0.497 | 0.052  | -0.520 | 3.009  | 0.518  | 10.694 | -0.453 | 3.866  | 0.048  | 43.476 |
| COL16A1  | 0.070  | 52.218 | 0.533  | 0.484  | 0.072  | 49.127 | 0.647  | 0.130  | 0.951  | 0.021  |
| COL18A1  | -0.087 | 49.540 | -0.170 | 3.205  | 0.467  | 0.556  | 0.545  | 5.543  | 0.273  | 11.001 |
| COL1A1   | -0.269 | 7.743  | -0.320 | 6.703  | -0.129 | 14.770 | 0.591  | 0.061  | 0.848  | 0.021  |
| COL25A1  | 0.912  | 0.324  | -0.501 | 0.514  | -0.066 | 49.127 | 0.021  | 53.272 | -0.026 | 40.051 |
| COL4A1   | 0.064  | 49.540 | 0.372  | 1.086  | 0.034  | 54.331 | -0.503 | 0.061  | -0.379 | 0.045  |
| COL4A2   | 0.267  | 4.284  | 0.294  | 4.122  | 0.082  | 49.127 | -0.440 | 0.061  | -0.660 | 0.021  |
| COL5A1   | -0.138 | 49.540 | -0.221 | 4.122  | 0.171  | 55.771 | 0.424  | 27.828 | 0.923  | 0.021  |
| COL5A3   | 0.082  | 52.827 | -0.300 | 0.784  | -0.256 | 2.056  | 0.939  | 0.061  | 0.975  | 0.021  |
| COL6A3   | -0.119 | 52.218 | 0.303  | 1.457  | -0.501 | 0.092  | 0.223  | 7.099  | 0.081  | 33.879 |
| COPZ2    | 0.094  | 44.812 | 0.445  | 4.122  | 0.477  | 0.641  | 0.446  | 1.617  | 0.603  | 0.021  |
| COQ4     | 0.212  | 37.036 | 0.218  | 2.123  | -0.141 | 29.328 | -0.470 | 8.987  | -0.598 | 0.021  |
| COX6A2   | -0.397 | 9.997  | -0.352 | 4.122  | 0.334  | 0.092  | 0.119  | 41.825 | 0.573  | 0.993  |
| CP       | -0.270 | 29.668 | -0.204 | 2.614  | 0.288  | 4.733  | -0.350 | 0.121  | 0.338  | 4.218  |
| CPE      | 0.239  | 1.431  | 0.674  | 0.445  | -0.188 | 33.124 | 0.052  | 52.124 | -0.476 | 0.084  |
| CPLX2    | -0.585 | 0.052  | -0.247 | 8.253  | 0.347  | 26.120 | 0.283  | 19.971 | -0.405 | 0.649  |
| CPLX3    | 0.068  | 51.013 | -0.519 | 0.859  | 0.604  | 3.475  | -0.070 | 47.420 | 0.068  | 36.831 |
| CPNE2    | -0.224 | 0.780  | -0.636 | 4.122  | 0.153  | 10.694 | -0.146 | 41.825 | 0.517  | 0.021  |
| CPNE4    | -1.074 | 0.052  | 0.220  | 5.829  | -1.033 | 0.092  | 0.863  | 1.617  | -1.087 | 0.039  |
| CPNE5    | 0.231  | 18.587 | 0.523  | 1.534  | 0.348  | 9.255  | 0.079  | 51.354 | 0.672  | 0.129  |
| CPNE8    | -0.043 | 54.701 | 0.729  | 0.420  | 0.063  | 41.103 | 0.206  | 16.936 | 0.403  | 0.993  |
| CPNE9    | -0.486 | 0.052  | -0.228 | 6.703  | 0.465  | 3.068  | -0.194 | 51.354 | -0.572 | 14.822 |
| CPSF2    | -0.059 | 51.013 | 0.619  | 0.595  | -0.360 | 12.575 | 0.703  | 0.506  | 0.249  | 0.649  |
| CPSF3    | 0.302  | 0.930  | 0.451  | 0.986  | 0.195  | 17.386 | 0.071  | 47.420 | -0.261 | 1.977  |
| CPSF6    | 0.531  | 0.930  | -0.296 | 2.859  | 0.012  | 59.793 | 0.371  | 23.450 | -0.860 | 0.021  |
| CPT2     | 0.063  | 49.540 | -0.202 | 0.784  | -0.276 | 0.240  |        |        | 0.476  | 0.891  |
| CRABP1   | 0.632  | 0.171  | 0.339  | 0.354  | 0.413  | 4.733  |        |        | 0.322  | 11.001 |
| CREB3L2  | 0.164  | 25.771 | -0.261 | 0.595  | 0.476  | 0.092  | -0.338 | 0.947  | 0.297  | 4.218  |
| CREB5    | 0.302  | 7.743  | 0.445  | 0.514  | -0.379 | 0.440  | -0.320 | 41.825 | 0.871  | 0.993  |
| CREBL2   | -0.507 | 0.052  | 0.258  | 1.212  | -0.178 | 49.127 | 0.301  | 0.130  | 0.664  | 0.213  |
| CREG1    | 0.150  | 25.771 | 0.704  | 1.534  | -0.116 | 26.120 | 0.089  | 52.124 | -0.422 | 0.977  |
| CRHR2    | -0.188 | 33.231 | -0.415 | 0.893  | 0.198  | 8.121  | 0.138  | 47.420 | 0.093  | 35.531 |
| CRIM1    | -0.763 | 0.093  | 0.281  | 5.829  | -0.365 | 0.517  | -0.390 | 23.450 | -0.493 | 0.021  |
| CRIP1    | -0.074 | 49.540 | 0.445  | 0.595  | 0.251  | 0.440  | -0.121 | 7.099  | 0.482  | 0.307  |
| CRIP3    |        |        | -0.444 | 0.986  | 0.221  | 0.856  | 0.060  | 47.420 | -0.262 | 8.002  |
| CRISPLD2 | -0.146 | 9.997  | -0.426 | 2.773  | 0.220  | 0.659  | 0.494  | 8.987  | 0.127  | 44.315 |
| CRLF1    | -0.300 | 21.797 | -0.396 | 0.705  | 0.040  | 58.406 | 0.047  | 50.493 | 0.340  | 24.398 |
| CRLS1    | -0.125 | 44.812 | 0.691  | 1.289  | -0.522 | 0.402  | -0.098 | 13.893 | 0.371  | 31.624 |
| CROT     | -0.103 | 49.540 | 0.693  | 0.514  | -0.103 | 22.899 | 0.279  | 1.617  | -0.467 | 0.021  |
| CRTAM    | -0.079 | 49.540 | -0.168 | 4.122  | -0.205 | 20.025 | -0.568 | 0.987  | 0.119  | 31.624 |
| CRYAA    | -0.672 | 0.052  |        |        | -0.203 | 36.892 | 0.278  | 2.415  | 0.263  | 24.398 |
| CRYBA4   | -0.340 | 33.231 |        |        | -0.207 | 54.331 | 0.309  | 27.828 | 0.909  | 0.021  |
| CRYM     | -0.092 | 52.218 | 0.116  | 8.253  | -0.488 | 0.092  | 0.114  | 41.825 | -0.423 | 0.039  |
| CSE1L    | 0.088  | 37.036 | 0.494  | 3.205  | -0.047 | 58.928 | -0.220 | 0.292  | -0.352 | 0.066  |
| CSF1R    | -0.071 | 57.367 | -0.225 | 0.514  | -0.095 | 26.120 | 0.225  | 2.415  | 0.630  | 0.021  |
| CSF2RA   |        |        | -0.437 | 2.773  | 0.100  | 41.103 | -0.091 | 16.936 | 0.496  | 0.021  |
| CSF2RB   | -0.699 | 0.052  | -0.234 | 4.122  | -0.329 | 10.694 | -0.375 | 27.828 | 0.681  | 0.021  |
| CSNK1G1  | -0.811 | 0.170  | -0.636 | 2.773  | -0.331 | 2.311  | -0.701 | 1.878  | -0.527 | 0.993  |
| CSPG4    | -0.243 | 3.157  | -0.132 | 7.537  | 0.175  | 2.659  | 0.025  | 52.656 | 0.424  | 0.391  |
| CSPP1    | -0.058 | 55.170 | 0.093  | 10.404 | -0.043 | 55.771 | -0.380 | 0.061  | -0.361 | 0.039  |
| CSRP2    | 0.131  | 7.743  | 0.515  | 0.784  | 0.234  | 36.892 | -0.598 | 0.506  | 0.146  | 14.822 |
| CST7     |        |        |        |        | -0.087 | 49.127 |        |        | 2.028  | 0.021  |
| CSTF1    | 0.029  | 54.154 | 0.240  | 2.300  | 0.059  | 49.127 | 0.066  | 47.420 | 0.422  | 0.039  |
| CTBP2    | -0.324 | 0.170  | -0.275 | 6.703  | -0.218 | 36.892 | 0.053  | 47.420 | -0.493 | 0.213  |
| CTDSP1   | -0.210 | 0.324  | -0.113 | 7.537  | 0.028  | 57.395 | 0.177  | 2.415  | 0.447  | 0.269  |
| CTF1     | -0.259 | 9.997  | 0.141  | 7.537  | 0.086  | 41.103 |        |        | 0.709  | 0.021  |
| CTGF     | -0.434 | 1.936  | 0.389  | 0.484  | 0.180  | 49.127 | -0.158 | 1.332  | -0.102 | 33.879 |
| CTH      |        |        | 0.687  | 0.300  | 0.043  | 58.074 | -0.149 | 13.893 | -1.097 | 0.021  |
| CTNNA2   | -0.302 | 0.052  | 0.437  | 0.595  | -0.195 | 1.098  | -1.064 | 0.061  | -0.425 | 0.119  |
| CTNNB1   | -0.244 | 44.812 | 0.652  | 0.180  | -0.114 | 33.124 | -0.587 | 0.250  | -0.948 | 0.021  |
| CTNNBIP1 | -0.066 | 37.036 | -0.146 | 8.881  | -0.050 | 56.823 | 0.078  | 47.420 | 0.470  | 0.649  |
| CTNND1   | 0.226  | 1.936  | -0.610 | 2.859  | 0.399  | 0.092  | 0.061  | 47.420 | 0.165  | 35.531 |
| CTR9     | 0.080  | 44.812 | -0.417 | 0.514  | -0.088 | 26.120 | 0.079  | 27.828 | -0.090 | 24.398 |
| CTSC     | 0.142  | 44.812 | 0.464  | 2.300  | -0.472 | 22.899 | 0.407  | 0.506  | -0.118 | 36.831 |
| CTSD     | 0.233  | 12.647 | 0.293  | 4.122  | 0.069  | 54.331 |        |        | 0.442  | 0.391  |
| CTSE     |        |        | -0.301 | 1.534  |        |        | -0.035 | 50.493 | 0.463  | 0.398  |
| CTSH     | -0.019 | 57.293 | -0.220 | 3.009  | 0.073  | 49.127 | 0.018  | 53.829 | 0.830  | 0.021  |



|               |        |        |        |        |        |        |        |        |        |        |
|---------------|--------|--------|--------|--------|--------|--------|--------|--------|--------|--------|
| CTSS          | -0.110 | 44.812 | -0.163 | 4.122  | -0.050 | 60.231 |        | 1.058  | 0.021  |        |
| CTSZ          | 0.137  | 25.771 | 0.195  | 8.881  |        |        | -0.046 | 51.354 | 0.641  | 0.021  |
| CTTNBP2       | 0.289  | 21.797 | 0.464  | 0.986  | -0.087 | 56.823 | -0.288 | 16.936 | -0.499 | 0.269  |
| CUL2          | 0.077  | 52.218 | 0.513  | 2.859  | 0.031  | 58.611 | 0.122  | 41.825 | 0.829  | 0.021  |
| CUL4B         | 0.068  | 52.218 | 0.510  | 0.986  | -0.085 | 41.103 | 0.084  | 41.825 | -0.287 | 1.193  |
| CUL9          | -0.111 | 29.668 | 0.390  | 2.773  | 0.054  | 54.331 | -1.045 | 0.292  | 0.284  | 0.269  |
| CUTC          | -0.027 | 57.293 | 0.202  | 4.122  | 0.231  | 2.056  | 0.454  | 0.855  | 0.207  | 14.822 |
| CUX2          | 0.091  | 29.668 | 0.206  | 2.773  | 0.265  | 12.575 | 0.206  | 1.878  | 0.565  | 0.649  |
| CX3CR1        | 0.034  | 49.540 | -0.390 | 0.514  | 0.338  | 33.124 | -0.227 | 41.825 | 0.638  | 0.021  |
| CXCL10        |        |        |        |        |        |        |        |        | 1.224  | 0.119  |
| CXCL13        |        |        |        |        | -0.092 | 54.331 |        |        | 1.167  | 0.021  |
| CXCL14        |        |        |        |        |        |        |        |        | 1.009  | 0.021  |
| CXCL16        | -0.583 | 1.936  | -0.343 | 0.514  | -0.060 | 49.127 | 0.194  | 1.878  | 1.625  | 0.021  |
| CYB5R4        | 0.100  | 33.231 | 0.524  | 1.534  | 0.298  | 17.386 | 0.537  | 11.241 | -0.508 | 0.021  |
| CYBA          | -0.088 | 52.218 |        |        | 0.104  | 22.899 | 0.392  | 0.061  | 0.913  | 0.021  |
| CYFIP2        | -0.288 | 5.928  | -0.449 | 0.595  | -0.560 | 0.092  | -0.144 | 47.420 | -0.131 | 24.398 |
| CYLD          | 0.418  | 0.171  | 0.289  | 1.457  | -0.234 | 5.705  | -0.108 | 32.497 | -0.557 | 0.021  |
| CYP1B1        | -0.154 | 44.812 | -0.232 | 11.783 |        |        | -0.424 | 13.893 | 0.526  | 0.119  |
| CYP26B1       | -0.672 | 0.262  | 0.356  | 0.877  | -0.612 | 1.309  | -0.993 | 0.061  | 0.103  | 24.398 |
| Cyp2c44       | -0.153 | 49.540 | -0.750 | 0.944  | 0.172  | 22.899 |        |        | -0.306 | 4.218  |
| CYP2D6        | -0.587 | 0.052  | 0.307  | 0.784  | 0.042  | 55.771 | -0.799 | 0.061  | 0.405  | 0.269  |
| CYP2G1P       | 0.441  | 0.126  | 0.168  | 10.404 | -0.152 | 3.475  | 0.400  | 4.906  | 0.544  | 0.021  |
| CYP2J2        | 0.082  | 44.812 | 0.553  | 0.514  | -0.065 | 49.127 | 0.333  | 2.415  | -0.877 | 0.021  |
| CYP46A1       | -0.104 | 21.797 | -0.571 | 0.614  | 0.009  | 60.505 | 0.021  | 55.172 | 0.115  | 31.624 |
| CYP4F12       | 0.095  | 37.036 | 0.431  | 2.300  | 0.363  | 9.255  | -0.323 | 0.109  | 0.465  | 0.993  |
| CYP4X1        | 0.076  | 33.231 | -0.444 | 1.029  | -0.166 | 26.120 | -0.041 | 49.358 | -0.513 | 0.045  |
| CYP51A1       | 0.223  | 0.171  | 0.652  | 1.212  | 0.324  | 3.475  |        |        | -0.436 | 0.066  |
| CYR61         | 0.042  | 52.218 | 0.133  | 1.534  |        |        | -0.332 | 11.241 | 0.638  | 0.471  |
| CYTH4         | -0.088 | 33.231 | 0.102  | 12.522 | 0.059  | 49.127 | 0.632  | 0.292  | 0.935  | 0.021  |
| D2HGDH        | -0.346 | 1.098  | 0.339  | 0.784  | -0.145 | 33.124 | -0.524 | 0.061  | 0.352  | 31.624 |
| D830050J10RIK | 0.107  | 25.771 | 0.270  | 2.300  | 0.146  | 12.575 | 0.105  | 51.354 | 0.676  | 0.021  |
| DAAM1         | -0.312 | 1.431  | 0.440  | 1.029  | -0.166 | 6.932  | 0.446  | 0.061  | -0.338 | 0.021  |
| DAB1          | 0.432  | 0.529  | -0.526 | 5.829  | 0.282  | 1.309  | -0.161 | 16.936 | -0.231 | 0.166  |
| DAB2          | -0.092 | 44.812 | 0.420  | 0.122  | 0.024  | 56.823 | -0.034 | 54.403 | 0.427  | 0.746  |
| DACH1         | 0.172  | 12.647 | -0.639 | 0.180  | -0.295 | 6.932  | 0.227  | 0.727  | 0.042  | 43.008 |
| DACT2         | 0.079  | 44.812 | -0.390 | 4.122  | 0.272  | 6.932  | 0.412  | 1.617  | 0.553  | 0.066  |
| DAG1          | -0.089 | 51.013 | 0.558  | 0.784  | 0.217  | 10.694 | -0.087 | 41.825 | -0.427 | 0.021  |
| DAGLA         | 0.232  | 1.431  | -0.500 | 3.205  | 0.085  | 49.127 | -0.300 | 8.987  | 0.619  | 0.166  |
| DAP           | 0.077  | 53.690 | 0.250  | 3.205  | 0.506  | 0.092  | 0.160  | 41.825 | 0.242  | 11.001 |
| DAPP1         | 0.476  | 0.398  | -0.085 | 10.404 | 0.133  | 49.127 | -0.608 | 2.415  | 0.101  | 44.052 |
| DARS          | 0.382  | 12.647 | 0.721  | 1.457  | -0.113 | 49.127 | 0.567  | 2.415  | 0.691  | 0.021  |
| DBI           | -0.027 | 55.559 |        |        |        |        | 0.127  | 16.936 | 0.542  | 0.066  |
| DCAF10        | 0.165  | 18.587 | 0.508  | 0.514  | 0.103  | 17.386 | 0.374  | 0.121  | -0.395 | 0.746  |
| DCAF12        | -0.315 | 37.036 | 0.632  | 0.204  | 0.070  | 49.127 | 0.179  | 0.855  | 0.396  | 0.119  |
| DCC           | 0.022  | 54.701 | 0.278  | 0.514  | -0.487 | 0.092  | 0.660  | 0.061  | -0.393 | 0.391  |
| DCK           | 0.204  | 2.450  | 0.225  | 4.122  | 0.093  | 54.331 | -0.382 | 0.109  | -0.525 | 0.119  |
| DCLK1         | -0.381 | 0.171  | 0.468  | 0.445  | -0.579 | 0.092  | -0.190 | 0.947  | -0.541 | 0.021  |
| DCLRE1A       | 0.211  | 21.797 | -0.753 | 0.877  | -0.264 | 17.386 | -0.100 | 52.656 | 0.461  | 0.021  |
| DCN           | -0.268 | 37.036 | 0.181  | 8.253  | 0.589  | 5.705  | 0.107  | 8.987  | 0.499  | 0.801  |
| DCTD          | -0.275 | 33.231 | 0.581  | 3.009  | 0.620  | 0.092  | 0.194  | 47.420 | -0.148 | 36.831 |
| DCUN1D3       | 0.135  | 44.812 | -0.354 | 2.859  | 0.111  | 49.127 | -0.134 | 47.420 | 0.447  | 0.746  |
| DCXR          | 0.199  | 5.928  | -0.300 | 0.514  | 0.084  | 41.103 | 0.252  | 5.543  | 0.487  | 0.021  |
| DDC           | -0.483 | 1.431  | 0.186  | 11.783 | -0.284 | 22.899 | -0.937 | 0.061  | 0.340  | 24.398 |
| DDHD2         | 0.068  | 44.812 | 0.305  | 2.300  | 0.015  | 58.611 | 0.252  | 23.450 | 0.433  | 0.269  |
| DDIT4L        | 0.051  | 55.170 | 0.457  | 5.829  | 0.351  | 8.121  | -0.115 | 49.358 | -0.403 | 0.977  |
| DDN           | 0.100  | 52.218 | 0.401  | 1.212  | 0.172  | 29.328 | -0.312 | 0.109  | -0.448 | 0.021  |
| DDR1          | -0.111 | 33.231 |        |        | 0.021  | 58.074 | 0.063  | 52.124 | 0.654  | 0.166  |
| DDX1          | -0.404 | 0.052  | 0.358  | 0.514  | -0.253 | 2.311  | -0.527 | 47.420 | 0.416  | 0.307  |
| DDX17         | -0.106 | 44.812 | 0.271  | 3.009  | 0.060  | 54.331 | -0.143 | 3.866  | -0.944 | 0.021  |
| DDX31         |        |        |        |        |        |        | -0.471 | 0.573  | 0.075  | 35.531 |
| DDX46         | -0.243 | 0.780  | 0.840  | 0.595  | -0.362 | 0.092  | -0.200 | 1.210  | -0.227 | 1.977  |
| DDX50         | 0.187  | 33.231 | 0.677  | 0.877  | 0.066  | 36.892 | 0.066  | 32.497 | -0.422 | 0.066  |
| DDX6          | -0.496 | 1.431  | 0.083  | 11.093 | -0.405 | 0.281  | 0.080  | 52.124 | -0.259 | 0.471  |
| DEAF1         | 0.166  | 29.668 | -0.592 | 0.773  | 0.298  | 8.121  | 0.052  | 50.493 | 0.249  | 4.218  |
| DEF6          | 0.437  | 0.052  | 0.150  | 0.784  | 0.522  | 0.092  | 0.685  | 0.292  | -0.370 | 24.398 |
| DENR          | 0.110  | 49.540 | 0.777  | 1.289  | -0.094 | 54.331 | 0.164  | 23.450 | -0.456 | 0.021  |
| DEPTOR        | 0.126  | 49.540 | -0.241 | 2.773  | -0.612 | 4.053  | -0.791 | 0.061  | 0.572  | 0.977  |
| DFFA          | 0.380  | 0.052  | 0.444  | 0.514  | 0.414  | 9.255  | 0.082  | 49.358 | -0.667 | 0.021  |

|          |        |        |        |        |        |        |        |        |        |        |
|----------|--------|--------|--------|--------|--------|--------|--------|--------|--------|--------|
| DFNB31   | -0.505 | 0.052  | 0.077  | 12.522 |        |        | 0.125  | 13.893 | 0.496  | 0.021  |
| DGKB     | -0.102 | 33.231 | 0.517  | 1.289  | 0.262  | 4.053  | 0.412  | 7.099  | -0.524 | 0.993  |
| DGKH     | -0.721 | 0.052  | 0.329  | 8.253  | -0.333 | 20.025 | 0.317  | 2.913  | -0.844 | 0.119  |
| DHCR24   | 0.603  | 0.780  | 0.215  | 8.881  | -0.082 | 56.823 | -0.473 | 1.332  | -0.523 | 0.993  |
| DIDO1    | -0.115 | 29.668 | -0.530 | 0.986  | -0.207 | 17.386 | -0.503 | 27.828 | -0.254 | 1.193  |
| DIO2     | -0.098 | 51.013 | 0.482  | 0.107  | 0.223  | 33.124 | 0.073  | 50.493 | -0.152 | 14.822 |
| DKKL1    | -0.073 | 44.812 | -0.300 | 3.009  | 0.516  | 0.517  |        |        | -0.214 | 6.001  |
| DLG1     | -1.024 | 0.052  | 0.368  | 0.354  | 0.343  | 3.475  | 0.183  | 27.828 | -1.168 | 0.021  |
| DLG2     | 0.065  | 49.540 | 0.261  | 8.253  | -0.675 | 0.092  | 0.428  | 2.415  | -0.411 | 0.021  |
| DLGAP2   | -0.069 | 49.540 | -0.184 | 4.122  | -0.360 | 2.659  | -0.192 | 41.825 | 0.974  | 0.021  |
| DLL1     | 0.118  | 37.036 | 0.573  | 0.267  | 0.273  | 17.386 | 0.217  | 1.210  | 0.184  | 39.468 |
| DMP1     | 0.194  | 0.930  | -0.378 | 9.629  | 0.322  | 3.068  | 0.347  | 0.061  | 0.500  | 31.624 |
| DMRT2    |        |        |        |        | 0.038  | 55.771 | -0.784 | 0.061  | 0.249  | 35.531 |
| DMXL2    | -0.526 | 0.052  | 0.501  | 2.300  | -0.386 | 0.641  | 0.353  | 13.893 | -0.380 | 24.398 |
| DNAH6    | -0.026 | 56.874 | 0.436  | 4.122  | 0.332  | 0.641  | 0.510  | 0.727  |        |        |
| DNAJB4   | -0.219 | 29.668 | 0.309  | 0.595  | -0.243 | 4.733  | -0.239 | 8.987  | -0.880 | 0.021  |
| DNAJB5   | 0.156  | 33.231 | 0.447  | 0.420  | 0.432  | 0.517  | -0.374 | 0.130  | -0.490 | 0.021  |
| DNAJB9   | -0.110 | 52.218 | 0.635  | 0.107  | -0.141 | 12.575 | 0.378  | 7.099  | -0.231 | 0.307  |
| DNAJC1   | -0.327 | 0.052  | 0.583  | 2.300  | -0.375 | 0.998  | -0.457 | 0.061  | 0.148  | 35.531 |
| DNAJC13  | 0.945  | 0.398  | 0.343  | 4.122  | 0.097  | 26.120 | 0.034  | 52.124 | -0.318 | 1.193  |
| DNAJC18  | -0.073 | 37.036 | 0.458  | 1.029  | -0.348 | 8.121  | 0.582  | 23.450 | 0.413  | 0.746  |
| DNAJC19  | -0.340 | 0.126  | -0.188 | 4.122  | -0.101 | 49.127 | -0.377 | 0.177  | -0.281 | 11.001 |
| DNAJC2   | -0.137 | 49.540 | -0.625 | 0.223  | -0.294 | 0.402  |        |        | 0.159  | 33.879 |
| DNAJC21  | 0.178  | 5.928  | 0.394  | 0.893  | 0.105  | 49.127 | 0.285  | 8.987  | -0.342 | 4.218  |
| DNAJC24  | 0.285  | 0.262  | 0.606  | 1.663  | 0.028  | 58.406 | -0.094 | 41.825 | -0.360 | 0.021  |
| DNAJC28  | -0.472 | 0.052  | 0.572  | 0.180  | -0.868 | 0.092  | 0.679  | 0.061  | 0.729  | 0.471  |
| DNAL1    | -0.072 | 57.293 | 0.575  | 1.029  | -0.160 | 41.103 | -0.190 | 0.292  | -0.451 | 0.391  |
| DNAL11   | -0.041 | 53.690 | 0.405  | 3.009  | 0.176  | 12.575 | 0.059  | 52.124 | 0.947  | 0.021  |
| DNASE1L1 | -0.264 | 52.218 |        |        | -0.137 | 41.103 | -0.261 | 49.358 | 0.513  | 0.021  |
| DNM1L    | -0.293 | 21.797 | 0.627  | 1.457  | -0.518 | 0.092  | 0.034  | 51.354 | -0.438 | 0.021  |
| DNMT3A   | -0.114 | 5.928  | 0.368  | 1.086  | 0.416  | 0.641  | -0.813 | 0.855  | -0.281 | 24.398 |
| DOCK1    | -0.305 | 0.529  | -0.555 | 0.893  | 0.214  | 2.659  | 0.043  | 47.420 | 0.567  | 0.045  |
| DOCK11   | -0.708 | 0.780  | 0.469  | 0.669  | -0.484 | 0.856  | -0.694 | 5.543  | -0.561 | 0.891  |
| DOCK4    | -0.339 | 0.324  | 0.546  | 1.212  | -0.236 | 4.733  | -1.073 | 0.250  | -0.674 | 0.021  |
| DOK1     | 0.346  | 1.098  | 0.288  | 0.300  | 0.211  | 0.641  | 0.146  | 19.971 | 0.755  | 0.021  |
| DONSON   | 0.082  | 44.812 | 0.876  | 0.877  | -0.078 | 33.124 | 0.075  | 41.825 | -0.480 | 0.119  |
| DPM1     | -0.246 | 0.052  | 0.280  | 1.772  | -0.278 | 0.641  | -0.818 | 0.061  | -0.594 | 0.021  |
| DPPA2    | -0.083 | 49.540 | -0.511 | 0.514  | -0.089 | 29.328 | 0.047  | 47.420 | -0.095 | 24.398 |
| DPYD     | -0.316 | 25.771 | 0.243  | 5.829  | -0.234 | 36.892 | -0.231 | 47.420 | -0.956 | 0.471  |
| DPYSL4   | 0.039  | 52.218 | -0.132 | 2.614  | 0.161  | 36.892 | 0.127  | 7.099  | 0.502  | 0.021  |
| DR1      | 0.041  | 54.154 | 0.544  | 2.773  | 0.025  | 58.074 | -0.268 | 0.506  | -0.416 | 0.039  |
| DRAM1    | 0.381  | 0.529  | 0.485  | 0.354  | 0.288  | 0.092  | 0.977  | 0.121  | -0.176 | 14.822 |
| DRAM2    | 0.008  | 56.765 | -0.153 | 0.784  |        |        |        |        | -0.374 | 0.891  |
| DRD2     | -0.590 | 0.529  | -0.212 | 4.122  | -0.215 | 8.121  | -0.071 | 50.493 | 0.419  | 0.746  |
| DRD4     | -0.312 | 0.780  | 0.299  | 4.122  | 0.379  | 20.025 | 0.048  | 53.272 | 0.625  | 0.045  |
| DRD5     | -0.152 | 5.928  | 0.595  | 2.614  | -0.083 | 54.331 | -0.255 | 41.825 | -0.229 | 0.471  |
| DROSHA   | 0.130  | 12.647 | 0.454  | 2.614  | 0.166  | 1.098  | 0.135  | 47.420 | -0.595 | 0.021  |
| DRP2     | 0.256  | 3.157  | 0.321  | 7.537  | -0.166 | 54.331 | 0.144  | 41.825 | -0.559 | 0.066  |
| DSG2     | 0.062  | 49.540 | -0.195 | 5.829  | -0.041 | 54.331 |        |        | 0.438  | 0.391  |
| DSP      | 0.322  | 44.812 | -0.549 | 0.614  | -0.294 | 54.331 | 0.105  | 41.825 | 0.397  | 24.398 |
| DSTN     | 0.136  | 44.812 | 0.673  | 0.514  | -0.219 | 26.120 | -0.067 | 47.420 | -0.415 | 0.269  |
| DTX4     | -0.208 | 12.647 | 0.457  | 0.784  | 0.415  | 0.092  | -0.269 | 1.332  | 0.582  | 0.021  |
| DUSP1    | -0.210 | 9.997  |        |        | -0.206 | 41.103 | -0.594 | 0.727  | 0.456  | 0.021  |
| DUSP16   | -0.445 | 0.052  | 0.756  | 0.354  | 0.053  | 49.127 | 0.543  | 0.130  | 0.627  | 0.993  |
| DUSP2    | 0.015  | 56.765 |        |        | 0.131  | 49.127 | 0.544  | 0.061  | 0.208  | 0.746  |
| DUSP26   | -0.325 | 0.052  | -0.331 | 2.859  | 0.246  | 17.386 | 0.487  | 0.061  | 0.335  | 4.218  |
| DUSP4    | 0.214  | 0.930  | 0.194  | 1.663  | 0.191  | 3.475  | 0.105  | 41.825 | -0.417 | 0.269  |
| DUT      | 0.019  | 56.874 | 0.401  | 0.514  | -0.028 | 57.395 | 0.161  | 13.893 | 0.252  | 4.218  |
| DYNC1H1  | -0.394 | 0.052  | 0.530  | 0.944  | -0.181 | 58.928 | -0.948 | 0.399  | -0.177 | 11.001 |
| DYNC2H1  | -0.794 | 0.052  | 0.615  | 0.944  | -0.760 | 0.440  | -0.436 | 0.947  | 0.608  | 0.021  |
| DYRK1A   | -0.232 | 5.928  | 0.727  | 0.595  | -0.209 | 10.694 | -0.838 | 0.061  | -0.402 | 0.269  |
| DYRK1B   | -0.048 | 51.013 | -0.448 | 0.784  | 0.053  | 54.331 | 0.237  | 11.241 | 0.522  | 0.021  |
| E2F1     | 0.270  | 1.098  | 0.211  | 0.514  | 0.407  | 2.056  | 0.275  | 41.825 | 0.821  | 0.119  |
| E2F3     | 0.125  | 37.036 | 0.370  | 0.514  | -0.367 | 0.724  | 0.532  | 0.121  | -0.553 | 0.021  |
| E2F5     | -0.048 | 55.870 | 0.309  | 2.614  | 0.081  | 26.120 | -0.419 | 0.061  | -0.203 | 0.891  |
| EARS2    | 0.112  | 44.812 | 0.418  | 4.122  | -0.045 | 58.611 | -0.781 | 0.061  | -0.234 | 14.822 |
| EBF3     | 0.279  | 44.812 | -0.705 | 2.773  | -0.417 | 0.281  | 0.987  | 0.061  | 0.409  | 39.468 |
| EBI3     | 0.309  | 0.052  | 0.115  | 5.829  | 0.313  | 0.517  | -0.364 | 11.241 | 0.397  | 0.977  |

|          |        |        |        |        |        |        |        |        |        |        |
|----------|--------|--------|--------|--------|--------|--------|--------|--------|--------|--------|
| ECHDC3   | -0.087 | 54.701 | 0.245  | 1.534  | 0.181  | 56.823 | -0.077 | 51.354 | 1.129  | 0.021  |
| EDA      | 0.439  | 0.052  | 0.234  | 8.881  | 0.282  | 0.092  | 0.194  | 7.099  | -0.612 | 0.021  |
| EDNRB    | -0.899 | 0.052  | -0.410 | 0.180  | -0.199 | 49.127 | -0.148 | 41.825 | 0.746  | 0.021  |
| EEA1     | 0.191  | 3.157  | -0.902 | 0.669  | -0.375 | 2.311  | 0.231  | 0.399  | -0.265 | 0.084  |
| EEF1D    | -0.243 | 9.997  | -0.387 | 0.669  | 0.743  | 0.092  | -0.710 | 1.332  | -0.925 | 0.021  |
| EEPD1    | 0.258  | 0.529  | 0.112  | 5.829  | -0.050 | 59.793 | 0.071  | 49.358 | -0.491 | 0.039  |
| EFCAB2   | -0.284 | 33.231 | 0.712  | 1.029  | -0.145 | 55.771 | 0.323  | 5.543  | -0.679 | 0.021  |
| EFEMP2   | -0.239 | 0.171  | 0.059  | 11.783 | 0.021  | 60.231 | 0.102  | 49.358 | 0.553  | 0.977  |
| EFHA1    | -0.491 | 0.052  | 0.736  | 0.107  | 0.218  | 29.328 | 0.654  | 0.341  | 0.077  | 35.531 |
| EFNA5    | -0.145 | 44.812 | -0.589 | 0.784  | 0.238  | 41.103 | -0.657 | 0.061  | 0.112  | 24.398 |
| EFNB2    | -0.156 | 52.218 | 0.648  | 0.354  | 0.279  | 12.575 | 0.223  | 0.573  | -0.213 | 0.891  |
| EFR3A    | 0.204  | 44.812 | 0.705  | 2.123  | -0.145 | 36.892 | -0.464 | 0.341  | -0.654 | 0.066  |
| EFR3B    | -0.151 | 49.540 | 0.607  | 0.569  | -0.152 | 49.127 | 0.059  | 41.825 | -0.497 | 0.993  |
| EFS      | -0.151 | 5.928  | -0.535 | 2.859  | -0.126 | 41.103 | -0.103 | 51.354 | 0.520  | 0.021  |
| EGF      | -0.135 | 29.668 | 0.345  | 0.514  | 0.430  | 14.770 | -0.717 | 0.061  | -0.704 | 0.993  |
| EGFR     | -0.421 | 0.780  | 0.306  | 1.457  | -0.297 | 0.281  | 0.771  | 3.866  | 0.446  | 0.119  |
| EGR1     | 0.541  | 0.324  | 0.507  | 0.602  | 0.230  | 12.575 | -0.224 | 1.878  | -0.059 | 37.824 |
| EGR2     | 1.349  | 0.052  | 0.599  | 0.267  | 0.589  | 0.659  | -0.089 | 41.825 | 0.320  | 35.531 |
| EGR4     | 0.649  | 0.052  | 0.109  | 11.093 | 0.206  | 3.475  | 0.110  | 47.420 | 0.347  | 1.193  |
| EHD4     | -0.279 | 0.171  | -0.548 | 2.614  | -0.033 | 60.505 |        |        | 0.530  | 0.119  |
| EIF2AK1  | -0.359 | 0.171  | -0.248 | 3.205  | 0.206  | 1.556  | 0.521  | 0.061  | -0.391 | 0.213  |
| EIF2AK2  |        |        | 0.468  | 0.514  | 0.087  | 41.103 | 0.019  | 55.172 | 0.562  | 0.977  |
| EIF2AK4  | 0.192  | 3.157  | -0.559 | 2.773  | -0.284 | 14.770 | -0.154 | 13.893 | -0.354 | 0.977  |
| EIF2C1   | 0.272  | 3.157  | -0.987 | 0.107  | 0.127  | 17.386 | 0.066  | 52.124 | 0.356  | 0.471  |
| EIF2S3   | -1.061 | 0.052  | 0.345  | 8.253  | 0.128  | 12.575 | -0.676 | 0.353  | -1.376 | 0.021  |
| EIF3A    | -0.184 | 33.231 | 0.717  | 1.663  | -0.431 | 0.402  | 0.098  | 16.936 | -0.443 | 0.039  |
| EIF3D    | 0.139  | 49.540 | 0.203  | 11.783 | -0.075 | 49.127 | -1.043 | 0.506  | -0.101 | 31.624 |
| EIF3E    | 0.106  | 29.668 | -0.383 | 0.773  | -0.068 | 49.127 | 0.024  | 53.272 | 0.360  | 24.398 |
| EIF3J    | 0.238  | 9.997  | -0.129 | 5.829  | 0.082  | 49.127 | 0.301  | 32.497 | 0.598  | 0.021  |
| EIF4A1   | 0.245  | 0.324  | 0.626  | 2.859  | 0.055  | 55.771 | -0.145 | 3.866  | 0.621  | 0.119  |
| Eif4e2   | 0.211  | 37.036 | 0.509  | 0.784  | -0.117 | 49.127 |        |        | -0.247 | 14.822 |
| EIF4EBP1 | -0.358 | 0.052  | -0.785 | 2.614  | 0.271  | 2.311  | 0.021  | 53.272 | 0.523  | 0.021  |
| EIF4G2   | -0.318 | 0.171  | 0.711  | 2.300  | -0.285 | 6.932  | 0.360  | 27.828 | -0.510 | 0.021  |
| EIF6     | 0.453  | 0.052  | 0.135  | 11.093 | 0.179  | 12.575 | 0.078  | 47.420 | 0.055  | 42.670 |
| ELAVL2   | -0.501 | 0.052  | -0.664 | 0.180  | -0.400 | 0.659  | -0.394 | 23.450 | -0.521 | 0.746  |
| ELF1     | -0.118 | 25.771 | -0.890 | 2.773  | -0.322 | 1.556  | 0.608  | 0.177  | 0.553  | 0.993  |
| ELK3     | -0.096 | 44.812 | -0.237 | 0.514  | 0.055  | 49.127 | -0.108 | 51.354 | 0.917  | 0.021  |
| ELL2     | -0.518 | 0.052  | -0.772 | 1.289  | 0.224  | 2.659  | -0.281 | 50.493 | -0.418 | 0.649  |
| ELMO1    |        |        | 0.163  | 5.829  | 0.038  | 54.331 | -0.274 | 0.947  | 0.456  | 0.129  |
| ELMO2    | 0.394  | 0.052  | 0.107  | 7.537  | 0.168  | 41.103 | -0.055 | 47.420 | 0.479  | 0.649  |
| ELMOD1   | 0.249  | 0.262  | 0.439  | 4.122  | 0.206  | 33.124 | -0.544 | 0.061  | -0.464 | 0.471  |
| ELOVL1   |        |        | -0.261 | 3.205  | 0.116  | 8.121  | 0.087  | 49.358 | 0.543  | 0.021  |
| ELOVL7   | 0.038  | 55.870 | 0.609  | 2.300  | 0.017  | 59.432 | -0.408 | 0.727  | 0.158  | 24.398 |
| EMB      | 0.142  | 49.540 | 0.395  | 1.663  | 0.433  | 3.068  | 0.554  | 0.130  | 0.121  | 31.624 |
| EMID1    | -0.121 | 51.013 | -0.044 | 13.299 |        |        | -0.133 | 47.420 | 0.510  | 0.918  |
| EML1     | -0.410 | 7.743  | -0.530 | 8.881  | 0.062  | 49.127 | 0.074  | 41.825 | -0.516 | 0.129  |
| EML5     | 0.012  | 56.513 | 0.307  | 4.122  | 0.027  | 58.928 | -0.593 | 2.913  | -0.803 | 0.021  |
| EML6     | 0.235  | 1.431  | 0.609  | 0.212  | 0.115  | 36.892 | 0.848  | 7.099  | 0.135  | 33.879 |
| EMP1     | -0.306 | 0.930  | 0.174  | 12.522 | 0.147  | 49.127 | -0.587 | 0.061  | 0.397  | 0.993  |
| EMP3     | -0.250 | 9.997  | 0.166  | 8.881  | 0.178  | 9.255  | 0.424  | 32.497 | 0.637  | 0.119  |
| EMR1     | 0.007  | 57.109 | -0.809 | 0.174  | 0.054  | 54.331 | -0.066 | 51.354 | 0.842  | 0.021  |
| EMX2     | 0.425  | 0.324  | 0.418  | 1.772  |        |        | -0.186 | 41.825 | -0.392 | 0.021  |
| Enah     | -0.358 | 0.126  | -0.610 | 4.122  | -0.123 | 26.120 | -0.599 | 0.947  | -0.762 | 0.021  |
| ENC1     | -0.764 | 0.171  | -0.706 | 0.300  | -0.572 | 0.440  | -0.633 | 13.893 | -0.268 | 11.001 |
| ENO3     | -0.252 | 7.743  | -0.423 | 0.784  | 0.027  | 58.406 | 0.188  | 47.420 | 0.396  | 0.649  |
| ENOX1    | 0.061  | 54.154 | 0.336  | 0.569  | -0.101 | 33.124 | 0.022  | 53.272 | -0.484 | 0.021  |
| ENPP1    | -0.304 | 25.771 | -0.168 | 5.829  |        |        | -0.276 | 49.358 | 0.460  | 0.129  |
| ENTPD2   | -0.137 | 3.157  |        |        |        |        | -0.097 | 52.124 | 0.556  | 0.021  |
| ENTPD3   | -0.421 | 0.262  | 0.285  | 5.829  | -0.532 | 0.092  | -0.452 | 0.061  | -0.586 | 0.993  |
| ENTPD4   | 0.137  | 25.771 | 0.429  | 0.663  | 0.021  | 59.793 | 0.019  | 55.172 | 0.118  | 33.879 |
| ENTPD7   | 0.382  | 1.431  | -0.861 | 0.614  | -0.045 | 54.331 | -0.037 | 49.358 | 0.270  | 31.624 |
| EPB41L2  | -0.099 | 33.231 | -0.119 | 5.829  | 0.471  | 0.092  | 0.061  | 41.825 | 0.606  | 0.021  |
| EPC1     | -0.493 | 7.743  | -0.631 | 0.859  | 0.078  | 54.331 | 0.451  | 2.913  | 0.230  | 31.624 |
| EPHA3    | -0.376 | 0.511  | 0.780  | 0.180  | -0.272 | 0.517  | 0.481  | 0.353  | -0.509 | 0.166  |
| EPHA5    | 0.303  | 25.771 | 0.621  | 0.784  | -0.384 | 8.121  | -0.127 | 41.825 | -0.520 | 0.021  |
| EPHB1    | -0.150 | 12.647 |        |        |        |        | -0.560 | 3.866  | 0.477  | 0.021  |
| EPHB2    |        |        | 0.132  | 9.629  | 0.067  | 54.331 | 0.120  | 7.099  | -0.431 | 0.021  |
| ERAL1    | -0.263 | 0.324  | -0.571 | 0.230  | -0.221 | 3.068  | -0.279 | 2.415  | 0.291  | 24.398 |

|                 |        |        |        |        |        |        |        |        |        |        |
|-----------------|--------|--------|--------|--------|--------|--------|--------|--------|--------|--------|
| ERBB2IP         | -0.535 | 0.052  | 0.429  | 2.300  | -0.138 | 6.932  | 0.673  | 8.987  | 0.290  | 31.624 |
| ERBB3           | 0.093  | 37.036 | 0.400  | 0.669  | 0.243  | 14.770 | 0.454  | 1.617  | 0.505  | 0.269  |
| ERC2            | -0.170 | 18.587 | 0.559  | 1.212  | -0.167 | 33.124 | 0.345  | 11.241 | -0.439 | 0.307  |
| ERCC6           | -0.063 | 51.013 | 0.816  | 1.289  | 0.213  | 1.309  | -0.087 | 41.825 | -0.395 | 0.166  |
| ERF             | -0.064 | 44.812 | 0.094  | 7.537  | 0.161  | 20.025 | 0.192  | 2.415  | 0.413  | 0.119  |
| ESCO1           | 0.420  | 3.157  | 0.545  | 0.420  | -0.143 | 26.120 | -0.331 | 3.866  | -0.138 | 31.624 |
| ETFDH           | 0.077  | 49.540 | 0.543  | 1.212  | -0.110 | 36.892 | -0.795 | 0.121  | -1.055 | 0.021  |
| ETV6            | 0.093  | 49.540 | -0.444 | 1.086  | 0.197  | 2.311  | -0.219 | 5.543  | 0.416  | 0.119  |
| EVI5L           | 0.207  | 1.098  | 0.519  | 0.569  | 0.252  | 0.517  | 0.329  | 32.497 | 0.689  | 0.471  |
| EVPL            | -0.157 | 0.529  | -0.472 | 0.514  | 0.316  | 9.255  | 0.295  | 3.866  | 0.466  | 0.021  |
| EXD1            | -0.710 | 0.052  | 0.345  | 0.484  | -0.086 | 60.505 | -0.346 | 50.493 | 0.695  | 0.746  |
| EXOC2           | 0.402  | 0.171  | 0.276  | 0.602  | -0.114 | 14.770 | 0.240  | 32.497 | 0.318  | 1.977  |
| EXOC5           | 0.192  | 21.797 | 0.650  | 1.086  | 0.054  | 54.331 | 0.438  | 1.617  | -0.561 | 0.066  |
| EXOSC3          | 0.080  | 37.036 | 0.531  | 0.267  | -0.476 | 2.311  | 0.272  | 0.130  | -0.216 | 31.624 |
| EZH2            | 0.042  | 52.218 | 0.469  | 0.669  |        |        | -0.185 | 41.825 | 0.167  | 42.212 |
| F11R            | -0.390 | 18.587 |        |        | 0.061  | 36.892 | -0.257 | 47.420 | 0.613  | 0.021  |
| F2R             | 0.028  | 55.559 | -0.122 | 12.522 | -0.274 | 26.120 | -0.165 | 1.878  | -0.337 | 0.993  |
| F3              | 0.014  | 56.130 | 0.574  | 0.986  | 0.014  | 59.793 |        |        | 0.289  | 44.315 |
| FABP7           | -0.465 | 0.262  | 0.506  | 0.877  | 0.234  | 12.575 | 0.289  | 0.177  | 0.375  | 24.398 |
| FADD            | -0.089 | 44.812 | -0.421 | 0.514  | 0.101  | 41.103 | 0.564  | 0.250  | 0.173  | 2.886  |
| FAIM            |        |        | 0.706  | 0.300  |        |        | 0.205  | 27.828 | -0.133 | 14.822 |
| FAM105A         | 0.303  | 29.668 | 0.441  | 0.595  |        |        | 0.195  | 50.493 | 0.132  | 41.878 |
| FAM107B         | 0.082  | 52.218 | 0.220  | 0.514  | 0.100  | 36.892 | -0.612 | 0.061  | -0.117 | 24.398 |
| FAM109A         | -0.113 | 18.587 | -0.154 | 2.859  | -0.048 | 57.395 |        |        | 0.413  | 0.166  |
| FAM114A1        | 0.457  | 0.052  |        |        | 0.747  | 1.556  |        |        | 0.286  | 2.886  |
| FAM120B         | 0.104  | 44.812 | 0.303  | 0.784  | 0.046  | 49.127 | 0.034  | 49.358 | -0.370 | 0.649  |
| FAM123B         | -0.477 | 0.052  |        |        | -0.372 | 0.092  | 0.187  | 27.828 | -0.316 | 31.624 |
| FAM135A         | -0.216 | 2.450  | 0.717  | 0.595  | -0.087 | 36.892 | -0.129 | 2.913  | -0.591 | 0.021  |
| FAM13B          | 0.085  | 44.812 | 0.671  | 1.086  | 0.068  | 41.103 | -0.051 | 49.358 | -0.694 | 0.039  |
| FAM13C          | 0.027  | 56.765 | 0.813  | 0.669  | -0.144 | 10.694 | 0.108  | 8.987  | -0.531 | 0.021  |
| FAM14A          | -0.113 | 49.540 | -0.168 | 4.122  | 0.013  | 59.432 | 1.151  | 0.341  | 1.622  | 0.021  |
| FAM172A         | -0.113 | 44.812 | -0.683 | 0.893  | -0.232 | 9.255  | 0.777  | 5.543  | 0.337  | 8.002  |
| FAM176A         | -0.353 | 0.511  | 0.621  | 0.595  | -0.337 | 14.770 | -0.477 | 11.241 | -0.648 | 0.021  |
| FAM184B         | -0.872 | 0.052  | 0.186  | 0.595  | -0.209 | 41.103 | -0.135 | 32.497 | -0.380 | 0.045  |
| FAM185A         | -0.134 | 15.278 | 0.102  | 12.522 | 0.031  | 55.771 | 0.072  | 49.358 | -0.498 | 0.021  |
| FAM188A         | 0.042  | 52.218 | 0.108  | 11.093 | -0.165 | 41.103 | 0.084  | 51.354 | -0.443 | 8.002  |
| FAM198B         | 0.433  | 3.157  | -0.072 | 11.093 | -0.154 | 49.127 | -0.092 | 52.124 | -0.506 | 0.269  |
| FAM19A1         | 0.259  | 1.098  | 0.396  | 1.289  | 0.055  | 54.331 | 0.170  | 27.828 | -0.444 | 0.021  |
| FAM19A2         | -0.300 | 33.231 | -0.058 | 13.299 | -0.281 | 0.092  | -0.048 | 47.420 | -0.836 | 0.649  |
| FAM203A/FAM203B | 0.063  | 49.540 | 0.330  | 1.772  | -0.090 | 54.331 | -0.069 | 41.825 | -0.439 | 0.021  |
| FAM40B          | 0.027  | 54.701 | 0.165  | 2.614  | -0.532 | 3.068  | -0.266 | 0.506  | -0.471 | 0.213  |
| FAM46A          | -0.331 | 0.093  | -0.395 | 6.703  | -0.360 | 6.932  | -0.241 | 47.420 | 0.101  | 14.822 |
| FAM49B          | 0.087  | 37.036 | 0.124  | 5.829  | -0.171 | 8.121  | -0.126 | 27.828 | -0.459 | 0.021  |
| FAM53B          | 0.314  | 5.928  | 0.360  | 5.829  | 0.452  | 0.281  | -0.444 | 8.987  | 0.053  | 43.008 |
| FAM59A          | 0.213  | 9.997  | 0.637  | 1.457  | -0.121 | 22.899 | 0.106  | 47.420 | -0.405 | 0.891  |
| FAM5B           | -0.072 | 55.870 | 0.472  | 2.773  | -0.610 | 0.092  | 0.363  | 2.415  | -0.279 | 6.001  |
| FAM5C           | 0.214  | 44.812 | 0.620  | 0.354  | 0.182  | 49.127 | 0.370  | 0.250  | -0.114 | 24.398 |
| FAM65B          | 0.080  | 49.540 | 0.902  | 0.602  | 0.266  | 4.733  | 0.151  | 8.987  | -0.232 | 4.218  |
| FAM78B          |        |        | -0.329 | 4.122  | 0.128  | 17.386 | -0.124 | 11.241 | -0.772 | 0.021  |
| FAM81A          | -0.132 | 49.540 | -0.249 | 4.122  | -0.122 | 49.127 | -0.257 | 7.099  | -0.378 | 0.891  |
| FANCA           | -0.798 | 0.052  | -0.302 | 6.703  | 0.264  | 49.127 |        |        | 0.463  | 24.398 |
| FANCB           | 0.263  | 12.647 | 0.582  | 0.514  | -0.160 | 6.932  | -0.551 | 0.399  | -0.498 | 0.021  |
| FANCD2          | -0.592 | 0.529  | 0.344  | 2.773  | 0.350  | 5.705  | 0.452  | 4.906  | -0.863 | 0.021  |
| FAR1            | 0.107  | 52.218 | 0.451  | 1.212  | -0.109 | 41.103 | 0.247  | 5.543  | -0.540 | 0.307  |
| FARP1           | 0.499  | 0.324  | 0.331  | 4.122  | -0.224 | 29.328 | -0.184 | 19.971 | 1.023  | 0.021  |
| FAS             | 0.029  | 52.827 | 0.401  | 5.829  | -0.177 | 8.121  | 0.291  | 0.177  | 0.570  | 0.021  |
| FASLG           | 0.771  | 0.052  | -0.271 | 6.703  | 0.358  | 0.724  | 0.093  | 41.825 | 0.136  | 33.879 |
| FASTK           | 0.127  | 33.231 | 0.358  | 0.484  | 0.105  | 17.386 | -0.477 | 0.061  | 0.204  | 44.052 |
| FAT3            | 0.426  | 0.529  | -0.398 | 4.122  | -0.241 | 2.056  | 0.080  | 41.825 | 0.037  | 44.052 |
| FAT4            | 0.102  | 25.771 | 0.774  | 0.595  | 0.031  | 55.771 | -0.201 | 27.828 | -0.625 | 0.021  |
| FBLN2           | -0.088 | 55.170 |        |        | 0.524  | 0.659  | -0.108 | 53.829 | 0.294  | 0.213  |
| FBLN5           | -0.511 | 0.666  | 0.227  | 6.703  | 0.123  | 29.328 | -0.292 | 11.241 | 0.934  | 0.021  |
| FBN2            | -0.100 | 37.036 | 0.304  | 2.773  | 0.243  | 0.856  | -0.921 | 1.210  | -0.086 | 41.258 |
| FBRS            | 0.103  | 44.812 | -0.301 | 3.009  | 0.089  | 49.127 | 0.175  | 13.893 | 0.619  | 0.045  |
| FBXL18          | -0.103 | 49.540 | -0.274 | 6.703  | -0.128 | 49.127 | -0.298 | 32.497 | 0.477  | 0.021  |
| FBXL7           | 0.097  | 44.812 | -0.768 | 1.457  | -0.430 | 5.705  | 1.269  | 0.121  | 0.688  | 0.977  |
| FBXO21          | 0.260  | 12.647 | 0.272  | 0.514  | -0.175 | 49.127 | 1.439  | 0.061  | -0.827 | 0.021  |
| FBXO22          | 0.313  | 0.170  | 0.665  | 0.784  | 0.097  | 49.127 |        |        | -0.638 | 0.649  |

|        |        |        |        |        |        |        |        |        |        |        |
|--------|--------|--------|--------|--------|--------|--------|--------|--------|--------|--------|
| FBX03  | 0.430  | 0.126  | 0.562  | 0.514  | 0.208  | 54.331 | -0.364 | 0.061  | -0.777 | 0.066  |
| FBX04  | -0.085 | 33.231 | -0.663 | 0.986  | 0.092  | 49.127 | -0.148 | 4.906  | 0.047  | 40.660 |
| FBXW8  | 0.087  | 49.540 | 0.366  | 5.829  | 0.105  | 33.124 | 0.613  | 0.061  | -0.288 | 0.084  |
| FCER1G | -0.133 | 49.540 | -0.544 | 1.663  | 0.052  | 56.823 | 0.301  | 0.061  | 1.062  | 0.021  |
| FCGR1A | 0.313  | 0.666  |        |        | 0.019  | 58.406 | 0.171  | 5.543  | 1.449  | 0.021  |
| FCGR2A | 0.507  | 0.052  | 0.373  | 5.829  | 0.262  | 0.659  | -0.283 | 2.913  | 0.708  | 0.021  |
| FCGR2B | -0.631 | 0.052  | -0.482 | 1.289  | -0.316 | 2.659  | 0.292  | 0.353  | -0.415 | 6.001  |
| FCGR3A | 0.039  | 51.013 | -0.331 | 3.009  | 0.066  | 49.127 | 0.013  | 55.172 | 0.559  | 0.021  |
| FCGRT  | -0.094 | 52.218 | 0.228  | 4.122  | 0.066  | 54.331 | 0.230  | 2.913  | 0.436  | 0.066  |
| FCHO2  | 0.335  | 0.398  | 0.406  | 1.086  | 0.064  | 41.103 | -0.145 | 3.866  | -0.553 | 0.021  |
| FDX1   | -0.143 | 7.743  | 0.665  | 0.264  | 0.083  | 49.127 | 0.232  | 2.415  | 0.181  | 1.977  |
| FECH   | -0.106 | 37.036 | 0.675  | 1.289  | -0.175 | 14.770 | -0.254 | 2.913  | -0.397 | 0.119  |
| FEM1C  | -0.184 | 51.013 | -0.356 | 3.205  | -0.416 | 0.856  | -0.708 | 5.543  | -1.126 | 0.021  |
| FES    | -0.133 | 52.827 | 0.399  | 0.264  | 0.185  | 1.556  | 0.201  | 27.828 | 0.656  | 0.021  |
| FGD2   | 0.156  | 9.997  |        |        |        |        | 0.558  | 0.061  | 0.668  | 0.021  |
| FGD4   | 0.490  | 0.052  | -0.559 | 1.663  | 0.079  | 41.103 | -0.722 | 0.061  | -0.066 | 38.751 |
| FGD6   |        |        | -0.706 | 0.569  | 0.352  | 33.124 | -0.643 | 11.241 | 0.401  | 0.471  |
| FGF10  | 0.178  | 18.587 | 0.775  | 0.230  | 0.080  | 33.124 | -0.062 | 41.825 | 0.249  | 40.660 |
| FGF11  | 0.127  | 49.540 | 0.387  | 0.305  | 0.189  | 3.475  | 0.034  | 50.493 | 0.120  | 41.258 |
| FGF13  | -0.159 | 4.284  | 0.667  | 0.569  | 0.066  | 49.127 | -1.155 | 0.061  | -0.666 | 0.021  |
| FGF19  | 0.158  | 12.647 | -0.285 | 3.009  | 0.294  | 3.068  | -0.596 | 4.906  | 0.402  | 0.307  |
| FGF5   | -0.842 | 0.052  | 0.482  | 0.445  | -0.699 | 1.556  | -0.736 | 1.878  | -0.670 | 0.993  |
| FGF9   | 0.228  | 37.036 | 0.573  | 0.107  | -0.110 | 20.025 | -0.054 | 47.420 | -0.555 | 0.269  |
| FGFR2  | -0.149 | 1.431  | 0.553  | 0.669  | 0.309  | 0.440  | 0.476  | 1.617  | -0.109 | 24.398 |
| FGFRL1 |        |        |        |        |        |        | -0.091 | 47.420 | 0.438  | 0.418  |
| FHDC1  | 0.470  | 0.170  |        |        | -0.209 | 6.932  | -0.383 | 1.617  | 0.172  | 33.879 |
| FHOD1  | 0.086  | 49.540 | 0.217  | 2.300  |        |        | 0.861  | 0.947  | 0.518  | 0.039  |
| FIGF   | 0.208  | 4.284  | 0.208  | 7.537  | 0.133  | 49.127 | 0.649  | 0.121  | 0.300  | 11.001 |
| FKBP10 |        |        |        |        | 0.092  | 22.899 | 0.249  | 7.099  | 0.455  | 0.901  |
| FKBP15 | -0.393 | 0.052  | -0.339 | 0.944  | -0.363 | 1.556  | 0.384  | 1.878  | -1.116 | 0.021  |
| FKBP5  | -0.489 | 7.743  | 0.298  | 5.829  | 0.238  | 55.771 | 0.817  | 8.987  | 0.588  | 0.802  |
| FKTN   | 0.065  | 49.540 | 0.453  | 0.784  | 0.159  | 2.056  | 0.093  | 49.358 | -0.373 | 0.119  |
| FLNC   | 0.142  | 7.743  | 0.240  | 3.205  | -0.095 | 41.103 | 0.130  | 49.358 | 1.307  | 0.021  |
| FLRT3  | -0.439 | 0.666  | 0.571  | 1.457  | -0.278 | 36.892 | -0.356 | 2.913  | -0.388 | 8.002  |
| FLT1   | 0.029  | 52.218 | 0.475  | 0.602  | 0.045  | 54.331 | 0.237  | 0.855  | 0.399  | 0.993  |
| FLT3LG | 0.016  | 56.513 | -0.436 | 0.784  | -0.248 | 1.819  | -0.306 | 16.936 | -0.187 | 11.001 |
| FLVCR1 | 0.396  | 0.780  | 0.450  | 0.264  | 0.154  | 4.733  |        |        |        |        |
| Fmn1   | -0.532 | 0.052  | -0.244 | 4.122  | 0.212  | 49.127 | -0.044 | 47.420 | 0.378  | 24.398 |
| FMNL2  | -0.428 | 0.052  | -0.295 | 3.205  |        |        | 0.124  | 19.971 | -0.226 | 11.001 |
| FMNL3  |        |        |        |        | 0.056  | 54.331 | 0.141  | 23.450 | 0.621  | 0.875  |
| FNTB   | 0.275  | 5.928  | 0.377  | 4.122  | 0.091  | 33.124 | -0.486 | 0.341  | 0.243  | 24.398 |
| FOS    | 0.973  | 0.052  | 0.682  | 0.107  | 0.194  | 0.641  | 0.264  | 0.506  | -0.102 | 24.621 |
| FOSB   | 0.200  | 37.036 | 0.187  | 11.093 | 0.484  | 0.092  | 0.204  | 1.332  | 0.003  | 44.315 |
| FOSL2  | 0.408  | 3.157  | 0.978  | 0.107  | 0.562  | 0.092  | 0.182  | 27.828 | -0.350 | 0.166  |
| FOXC2  | -0.915 | 0.052  |        |        | 0.151  | 33.124 | -0.192 | 50.493 | 0.344  | 11.001 |
| FOXF2  | -0.079 | 57.293 | 0.824  | 0.986  | 0.171  | 20.025 | -0.640 | 0.855  | -0.568 | 0.021  |
| FOXN3  | -0.213 | 0.780  | 0.654  | 0.784  | -0.501 | 0.517  | 0.636  | 13.893 | 0.530  | 0.045  |
| FOXO1  | -0.089 | 33.231 | 0.856  | 0.484  | 0.078  | 36.892 | 0.588  | 0.061  | 0.435  | 0.891  |
| FOXP2  | -0.352 | 1.098  | -0.122 | 9.629  | -0.625 | 0.856  | 0.238  | 1.210  | -0.217 | 8.002  |
| FPGS   | -0.473 | 0.666  | -0.182 | 0.784  |        |        | 0.150  | 41.825 | 0.299  | 11.001 |
| FRAS1  | -0.525 | 0.171  | -0.482 | 1.457  | 0.014  | 60.231 | -0.777 | 0.061  | -0.639 | 0.993  |
| FRMD5  | 0.128  | 29.668 | 0.358  | 5.829  | 0.104  | 49.127 | -0.265 | 0.341  | -0.442 | 0.471  |
| FRRS1  | -0.079 | 44.812 | 0.477  | 2.614  | 0.114  | 8.121  | 0.108  | 53.272 | 0.760  | 0.039  |
| FRZB   | -0.151 | 51.013 | 0.641  | 1.029  | -0.177 | 4.733  | 0.430  | 0.506  | -0.536 | 0.119  |
| FSTL5  | -0.642 | 0.262  | -0.230 | 2.859  | -0.339 | 10.694 | -0.184 | 27.828 | -0.712 | 0.129  |
| FTO    | 0.356  | 18.587 | 0.415  | 0.354  | -0.118 | 49.127 | -0.241 | 32.497 | -0.181 | 2.886  |
| FUBP1  | -0.312 | 3.157  | 0.437  | 1.086  | 0.524  | 9.255  | 0.311  | 51.354 | -0.478 | 0.066  |
| FUT8   |        |        | 0.493  | 5.829  | 0.139  | 5.705  |        |        | -0.278 | 6.001  |
| FXYD1  | 0.089  | 53.690 | -0.326 | 2.859  | 0.247  | 1.309  | -0.135 | 5.543  | 0.793  | 0.021  |
| FXYD5  | 0.077  | 33.231 |        |        |        |        | 0.135  | 27.828 | 0.524  | 0.021  |
| FXYD6  |        |        | 0.255  | 2.123  | 0.395  | 1.556  | -0.040 | 53.829 | 0.653  | 0.471  |
| FYB    | -0.045 | 52.218 | -0.268 | 3.205  | 0.027  | 58.074 | 0.306  | 1.617  | 0.447  | 0.021  |
| FYCO1  | -0.428 | 0.052  | 0.772  | 1.534  | -0.349 | 9.255  | -0.253 | 5.543  | -0.112 | 0.129  |
| FZD10  | 0.215  | 0.666  | 0.709  | 0.569  | -0.035 | 59.793 | 0.025  | 53.272 | 0.241  | 33.879 |
| FZD4   | -0.234 | 1.431  | -0.262 | 2.859  | 0.105  | 55.771 | 0.672  | 0.250  | -0.205 | 0.649  |
| FZD9   | -0.209 | 29.668 | -0.434 | 4.122  | 0.057  | 54.331 | 0.276  | 3.866  | 0.521  | 0.021  |
| G2E3   | 0.227  | 37.036 | 0.354  | 0.204  | 0.323  | 1.819  | -0.554 | 0.130  | 0.221  | 31.624 |
| G3BP1  | 0.096  | 25.771 | 0.321  | 0.267  | 0.143  | 17.386 | 0.278  | 19.971 | -0.512 | 0.307  |

|            |        |        |        |        |        |        |        |        |        |        |
|------------|--------|--------|--------|--------|--------|--------|--------|--------|--------|--------|
| G3BP2      | -0.078 | 49.540 | -0.150 | 8.253  | -0.147 | 10.694 | 0.075  | 49.358 | -0.477 | 0.021  |
| GABBR1     | 0.087  | 44.812 | -0.400 | 2.773  | 0.279  | 49.127 | 0.808  | 0.061  | 0.259  | 4.218  |
| GABPA      | 0.196  | 7.743  | 0.620  | 0.514  | 0.044  | 54.331 | -0.390 | 0.353  | -0.487 | 0.045  |
| GABRA1     | -0.380 | 0.052  | -1.102 | 0.107  | -0.240 | 17.386 | -0.835 | 0.727  | -0.333 | 0.307  |
| GABRA2     | -0.381 | 0.052  | -0.409 | 2.123  | -0.135 | 41.103 | -0.195 | 27.828 | -0.440 | 0.307  |
| GABRA3     | 0.029  | 54.701 | -0.970 | 2.773  | 0.458  | 0.641  | -0.376 | 3.866  | -0.136 | 8.002  |
| GABRA4     | -0.046 | 54.154 | -0.562 | 1.212  | -0.235 | 10.694 | -0.214 | 41.825 | -0.389 | 0.021  |
| GABRA5     | 0.089  | 44.812 | 0.427  | 2.123  | -0.238 | 8.121  | -0.106 | 16.936 | -0.446 | 0.021  |
| GABRG2     | -0.187 | 33.231 | 0.401  | 5.829  | -0.734 | 17.386 | -0.511 | 27.828 | -0.704 | 0.021  |
| GABRG3     | -0.042 | 53.690 | -0.230 | 3.009  | -0.447 | 0.092  | -0.634 | 0.061  | 0.054  | 42.030 |
| GABRR1     | -0.045 | 54.701 | -0.369 | 0.422  | -0.022 | 60.505 | -0.088 | 47.420 | -0.057 | 31.624 |
| GAD2       | -0.227 | 0.529  | 0.388  | 0.784  | -0.426 | 0.659  | -0.440 | 1.332  | -0.268 | 4.218  |
| GADD45B    | 0.526  | 0.052  | 0.207  | 1.289  | 0.178  | 3.475  | -0.109 | 41.825 | 0.529  | 0.993  |
| GADD45G    | 0.171  | 3.231  | 0.492  | 0.986  | 0.075  | 36.892 | 0.046  | 47.420 | 0.082  | 31.624 |
| GADD45GIP1 | 0.455  | 0.930  | 0.460  | 0.829  | -0.044 | 57.395 | 0.142  | 13.893 | 0.204  | 11.001 |
| GAL3ST1    | -0.101 | 56.765 | 0.224  | 1.663  | 0.477  | 0.240  |        |        | -0.101 | 36.831 |
| GALC       | 0.852  | 0.093  | -0.227 | 2.859  | 0.223  | 3.068  | 0.100  | 27.828 | 0.283  | 31.624 |
| GALK2      | 0.529  | 0.052  |        |        | 0.059  | 57.395 | -0.187 | 13.893 | -0.087 | 36.831 |
| GALNT1     | -0.379 | 0.511  | 0.114  | 8.253  | -0.231 | 1.819  | 0.256  | 47.420 | -0.835 | 0.021  |
| GALNT10    | -0.459 | 0.666  | 0.215  | 1.534  | -0.139 | 41.103 | 0.277  | 41.825 | 0.526  | 0.993  |
| GALNT11    | 0.135  | 29.668 | -0.497 | 4.122  | -0.024 | 59.432 | -0.232 | 1.210  | -0.478 | 0.119  |
| GALNT12    | -0.431 | 1.431  | -0.256 | 4.122  | 0.358  | 1.819  | -0.632 | 0.061  | 0.740  | 0.021  |
| GALNT13    | -0.204 | 1.098  | 0.656  | 0.514  | -0.136 | 49.127 | -0.206 | 0.573  | -0.384 | 0.993  |
| GALNT14    | 0.423  | 0.431  | -0.196 | 3.009  | -0.116 | 29.328 | -0.289 | 41.825 | 0.338  | 24.398 |
| GALNT3     | 0.205  | 33.231 | -0.774 | 1.086  | -0.714 | 0.641  | 0.094  | 51.354 | -0.344 | 24.398 |
| GALNT6     | 0.482  | 0.052  | 0.218  | 0.514  | 0.230  | 49.127 | 0.270  | 41.825 | 0.289  | 24.398 |
| GALNTL2    | -0.459 | 0.126  |        |        | -0.221 | 26.120 | 0.941  | 0.130  | 1.338  | 0.021  |
| GALNTL4    | -0.487 | 0.052  | 0.710  | 1.457  | -0.508 | 0.092  | -0.307 | 2.415  | -0.879 | 0.021  |
| GALT       | -0.163 | 25.771 | -0.495 | 0.595  | 0.024  | 60.505 | 0.031  | 53.272 | -0.116 | 14.822 |
| GARNL3     | -0.175 | 1.936  | -0.705 | 2.859  | 0.369  | 0.240  | -0.533 | 16.936 | 0.425  | 0.391  |
| GATA2      | -0.276 | 4.284  | 0.689  | 0.602  | 0.438  | 10.694 | -1.213 | 0.121  | 0.595  | 0.021  |
| GATA6      | -0.519 | 1.936  | 0.646  | 0.514  | -0.114 | 22.899 | -0.163 | 23.450 | -0.178 | 31.624 |
| GATM       | -0.258 | 0.171  | 0.277  | 9.629  | -0.150 | 12.575 | -0.225 | 0.573  | 0.535  | 0.045  |
| GBF1       | -0.634 | 0.093  | -0.434 | 0.484  | -0.344 | 1.819  | 0.065  | 52.656 | -0.027 | 38.751 |
| GCC2       | 0.132  | 51.013 | 0.462  | 1.212  | 0.041  | 55.771 | 0.421  | 0.353  | -0.476 | 0.021  |
| GCN1L1     | 0.307  | 0.529  | 0.430  | 1.457  | -0.687 | 0.092  | -0.490 | 1.332  | 0.249  | 0.391  |
| GCNT1      | 0.629  | 0.052  | -0.214 | 3.205  | 0.346  | 9.255  | -0.351 | 49.358 | 1.105  | 0.021  |
| GCNT2      | -0.776 | 0.052  |        |        | 0.117  | 29.328 | -0.691 | 7.099  | -0.255 | 24.398 |
| GEN1       | 0.028  | 55.870 | 0.645  | 0.180  | -0.129 | 36.892 | 0.632  | 0.061  | 0.079  | 33.879 |
| GFAP       |        |        |        |        |        |        |        |        | 1.808  | 0.021  |
| GFM1       | 0.171  | 25.771 | 0.782  | 0.267  | 0.110  | 26.120 | -0.300 | 1.617  | -0.462 | 0.021  |
| GFRA1      | -0.467 | 0.780  | -0.169 | 0.514  | -0.360 | 0.092  | -0.656 | 0.061  | -0.432 | 0.993  |
| GGT5       | -0.475 | 2.450  | 0.180  | 0.595  |        |        | 0.975  | 0.061  | 0.833  | 0.021  |
| GGTA1P     | -0.164 | 29.668 | -0.154 | 4.122  | 0.360  | 22.899 | 0.469  | 0.353  | 0.744  | 0.891  |
| GHR        | -0.748 | 0.780  | -0.232 | 1.663  | 0.347  | 0.659  | -1.725 | 0.061  | 0.607  | 0.084  |
| GIGYF1     | 0.126  | 44.812 | -0.497 | 2.614  | 0.063  | 54.331 | -0.545 | 0.061  | 0.138  | 24.398 |
| GJA3       |        |        | -0.488 | 0.422  | -0.058 | 54.331 | 0.064  | 49.358 | 0.172  | 31.624 |
| GJA5       | 0.255  | 7.743  | -0.250 | 3.205  | 0.311  | 0.724  | 0.529  | 0.399  | 0.278  | 4.218  |
| GJB2       | 0.034  | 55.170 | 0.931  | 0.180  | -0.322 | 3.068  | 0.605  | 16.936 | 0.601  | 0.993  |
| GJB6       | -0.099 | 44.812 | 0.290  | 0.514  | 0.054  | 54.331 | 0.150  | 8.987  | 0.637  | 0.021  |
| GLA        | 0.035  | 53.690 | 0.413  | 0.829  | -0.090 | 49.127 | -0.112 | 47.420 | -0.106 | 33.879 |
| GLI3       | -0.148 | 37.036 | -0.051 | 10.404 | 0.287  | 29.328 | -0.083 | 50.493 | 0.824  | 0.021  |
| GLIPR2     | 0.248  | 0.324  | -0.077 | 12.522 | -0.088 | 59.432 | -0.199 | 0.250  | 0.934  | 0.021  |
| GLMN       | 0.309  | 0.666  |        |        | 0.016  | 60.231 |        |        | -0.499 | 0.045  |
| GLRX2      | 0.253  | 0.529  | 0.477  | 0.107  | -0.041 | 58.074 | -0.083 | 41.825 | 0.276  | 8.002  |
| GLS        | -0.250 | 15.278 | 0.617  | 0.912  | -0.445 | 1.309  | -0.344 | 13.893 | 0.616  | 31.624 |
| GMFB       | 0.402  | 0.511  | 0.584  | 0.174  | -0.177 | 8.121  | -0.168 | 0.947  | -0.524 | 0.066  |
| GMFG       | -0.043 | 56.130 | 0.469  | 0.180  | 0.097  | 49.127 | -0.371 | 0.130  | 0.646  | 0.021  |
| GNAI1      | -0.193 | 3.157  | -0.483 | 0.107  | -0.243 | 2.659  | -0.082 | 49.358 | 0.135  | 24.398 |
| GNAZ       | 0.335  | 21.797 | 0.590  | 0.267  | 0.143  | 36.892 | -0.157 | 47.420 | -0.388 | 0.119  |
| GNB1       | -0.088 | 54.701 | 0.455  | 0.514  | 0.157  | 41.103 | -0.295 | 0.727  | -0.280 | 0.269  |
| GNG11      | -0.194 | 18.587 | -0.507 | 0.614  | 0.150  | 17.386 | 0.242  | 1.332  | 0.364  | 14.822 |
| GNS        | -0.067 | 55.870 | -0.929 | 0.935  | 0.232  | 49.127 | -0.265 | 49.358 | 0.268  | 24.398 |
| GOLGA3     | 0.464  | 0.052  | 0.522  | 0.514  | -0.067 | 41.103 | 0.222  | 1.210  | -0.112 | 31.624 |
| GOLGA5     | 0.319  | 15.278 | 0.245  | 5.829  | -0.706 | 0.092  | 0.444  | 0.399  | -0.140 | 24.398 |
| GOLGA7     | -0.091 | 55.559 | 0.531  | 0.354  | 0.117  | 49.127 | 0.046  | 49.358 | -0.217 | 1.977  |
| GOLGB1     | -0.461 | 0.052  | 0.428  | 6.703  | -0.539 | 0.281  | 0.591  | 0.130  | -0.407 | 0.084  |
| GOLPH3     | 0.129  | 44.812 | 0.711  | 0.107  | 0.254  | 9.255  | -0.447 | 41.825 | 0.462  | 0.977  |

|          |        |        |        |        |        |        |        |        |        |        |
|----------|--------|--------|--------|--------|--------|--------|--------|--------|--------|--------|
| GOPC     | 0.178  | 44.812 | -0.414 | 3.205  | 0.306  | 0.092  | -0.682 | 4.906  | -0.225 | 11.001 |
| GORAB    | 0.178  | 2.450  | -0.077 | 13.299 | -0.234 | 3.475  | -0.121 | 32.497 | -0.501 | 0.021  |
| GPAT2    | 0.110  | 18.587 | -0.219 | 1.772  | -0.114 | 49.127 |        |        | 0.471  | 0.166  |
| GPC5     | -0.358 | 1.431  | 0.792  | 0.086  | -0.558 | 1.309  | 0.342  | 47.420 | 0.123  | 44.052 |
| GPCPD1   | -0.332 | 0.324  | 0.227  | 8.253  | -0.131 | 55.771 | 0.077  | 47.420 | -0.427 | 0.021  |
| GPM6B    | 0.078  | 49.540 | -0.357 | 0.514  | -0.356 | 0.641  | -0.110 | 13.893 | -0.350 | 0.045  |
| GNMB     | 0.058  | 44.812 | -0.291 | 0.514  |        |        | 0.144  | 16.936 | 1.225  | 0.129  |
| GPR108   | -0.061 | 54.154 | -0.430 | 3.205  | 0.017  | 58.406 | 0.095  | 23.450 | 0.395  | 0.119  |
| GPR124   | -0.038 | 55.870 | -0.417 | 4.122  | 0.397  | 0.641  | 0.041  | 53.272 | 0.168  | 33.879 |
| GPR156   | -0.186 | 0.324  | -0.522 | 0.514  | -0.067 | 41.103 |        |        | 0.269  | 11.001 |
| GPR160   | -0.785 | 0.052  |        |        | -0.163 | 49.127 | 0.383  | 8.987  | 0.849  | 0.021  |
| GPR17    | 0.109  | 49.540 | -0.161 | 5.829  | 0.071  | 54.331 | -0.042 | 51.354 | 0.562  | 0.021  |
| GPR179   | -0.459 | 0.052  | -0.558 | 2.859  | 0.130  | 36.892 | 0.191  | 4.906  | 0.171  | 6.001  |
| GPR26    | -0.509 | 0.930  | 0.180  | 7.537  | -0.414 | 5.705  | -0.622 | 41.825 | -0.254 | 14.822 |
| GPR37    | -0.072 | 49.540 | -0.306 | 5.829  | 0.023  | 58.406 | -0.473 | 0.061  | -0.291 | 0.746  |
| GPR37L1  | -0.132 | 7.743  | -0.084 | 5.829  | 0.040  | 49.127 | 0.162  | 27.828 | 0.479  | 0.746  |
| GPR39    | -0.091 | 44.812 | -0.665 | 0.514  |        |        | 0.069  | 47.420 | 0.238  | 24.398 |
| GPR4     | -0.033 | 56.130 | -0.467 | 2.859  | -0.180 | 8.121  | -0.517 | 0.061  | 0.087  | 37.824 |
| GPR56    |        |        | 0.291  | 0.944  |        |        | 0.185  | 41.825 | 0.572  | 0.129  |
| GPR6     | -0.130 | 21.797 | -0.210 | 0.784  | 0.036  | 54.331 | 0.423  | 0.130  | -0.589 | 0.021  |
| GPR64    | 0.069  | 37.036 | 0.570  | 0.986  | 0.066  | 54.331 | 0.298  | 41.825 | -0.299 | 36.831 |
| GPR84    | -0.182 | 5.928  | 0.488  | 0.514  |        |        |        |        | 1.566  | 0.021  |
| GPR85    |        |        | 0.627  | 0.669  | -0.089 | 33.124 | 0.175  | 1.332  | -0.532 | 0.021  |
| GPR88    | -1.331 | 0.052  | -0.425 | 4.122  |        |        |        |        | 0.093  | 42.369 |
| GPR98    | 0.074  | 37.036 | -0.362 | 3.205  | 0.132  | 5.705  | 0.427  | 0.573  | -0.067 | 31.624 |
| GPRC5C   | -0.137 | 2.450  | -0.353 | 3.009  | 0.276  | 0.659  | -0.289 | 32.497 | 0.666  | 0.021  |
| GPSM3    | 0.618  | 0.052  | 0.178  | 5.829  | 0.141  | 9.255  | -0.425 | 0.506  | 0.567  | 0.471  |
| GPX3     |        |        | 0.244  | 5.829  | -0.563 | 0.092  | -0.320 | 0.250  | 0.494  | 0.039  |
| GRAMD3   | -0.100 | 33.231 | -0.308 | 8.253  | 0.091  | 26.120 | 0.523  | 0.353  | 0.411  | 0.891  |
| GRAP     | 0.052  | 52.218 | -0.393 | 0.354  | 0.077  | 41.103 |        |        | 0.589  | 0.021  |
| GRB7     | -0.146 | 52.218 | -0.201 | 3.205  | -0.134 | 12.575 |        |        | 0.375  | 0.109  |
| GREB1L   |        |        | -0.516 | 0.602  |        |        | -0.160 | 2.913  | 0.312  | 0.269  |
| GREM1    | -0.241 | 49.540 | 0.102  | 6.703  | 0.503  | 0.440  | -0.643 | 7.099  | 0.607  | 31.624 |
| GRIA2    | 0.252  | 2.450  | 0.593  | 0.420  | -0.322 | 36.892 | -0.226 | 27.828 | -0.268 | 1.193  |
| GRIA3    | -0.473 | 0.052  | 0.446  | 1.663  | -0.187 | 6.932  | -0.204 | 0.727  | -0.656 | 0.021  |
| GRIA4    | -0.557 | 0.052  | 0.398  | 4.122  | -0.785 | 0.402  | -0.598 | 8.987  | -0.449 | 0.129  |
| GRID1    | -0.369 | 0.511  | 0.329  | 1.534  | 0.088  | 57.395 | -0.915 | 0.061  | -0.614 | 0.021  |
| GRIK4    | -0.649 | 0.052  | 0.305  | 0.944  | -0.123 | 58.074 | 0.452  | 1.617  | -0.651 | 0.746  |
| GRIN1    | -0.031 | 54.154 | -0.160 | 4.122  | 0.116  | 22.899 | -0.569 | 0.061  | -0.171 | 24.398 |
| GRIN2B   | -0.084 | 44.812 | -0.537 | 0.514  | -0.134 | 1.309  | -0.376 | 3.866  | -0.424 | 0.993  |
| GRIP1    | -0.127 | 29.668 | 0.352  | 3.009  | -0.226 | 2.056  | -0.155 | 19.971 | -0.533 | 0.119  |
| GRK4     | 0.020  | 57.109 | -0.396 | 0.309  | 0.024  | 58.406 | 0.106  | 41.825 | 0.305  | 0.977  |
| GRK5     | 0.025  | 52.827 | 0.370  | 0.514  | 0.248  | 5.705  | 0.594  | 16.936 | -0.630 | 0.119  |
| GRK6     | 0.133  | 29.668 | -0.416 | 0.602  | -0.116 | 54.331 | 0.312  | 32.497 | 0.059  | 42.554 |
| GRM5     | -0.643 | 0.262  | 0.343  | 2.300  | -0.578 | 6.932  | -0.228 | 11.241 | -0.164 | 24.398 |
| GSDMA    | 0.139  | 2.450  | -0.480 | 0.944  | -0.219 | 26.120 | 0.052  | 47.420 | 0.329  | 31.624 |
| GSDMD    | 0.209  | 2.450  | -0.064 | 11.093 | 0.250  | 9.255  | -0.406 | 0.353  | 0.843  | 0.021  |
| GSG1L    | 0.077  | 49.540 | 0.460  | 0.180  | 0.231  | 36.892 |        |        | 0.002  | 44.315 |
| GSK3A    | 0.305  | 3.157  | 0.306  | 5.829  | 0.029  | 57.395 |        |        | 0.419  | 0.391  |
| GSN      | 0.229  | 4.284  | 0.121  | 9.629  |        |        | -0.390 | 0.399  | 0.904  | 0.021  |
| GSR      | -0.054 | 49.540 | 0.336  | 2.300  | 0.031  | 58.611 | 0.460  | 0.399  | 0.105  | 40.660 |
| GSTK1    | -0.236 | 0.666  | -0.627 | 1.663  |        |        | 0.246  | 3.866  | 0.268  | 24.398 |
| Gstm3    | -0.166 | 37.036 | -0.164 | 4.122  | 0.158  | 36.892 | 0.087  | 27.828 | 0.580  | 0.021  |
| GSTM5    | -0.175 | 29.668 | -0.175 | 3.205  | 0.156  | 20.025 | 0.097  | 41.825 | 0.561  | 0.021  |
| GTDC1    | -0.416 | 0.052  | -0.217 | 5.829  | 0.185  | 6.932  | 0.165  | 8.987  | -0.378 | 0.269  |
| GTF2IRD1 | -0.487 | 0.052  | 0.413  | 5.829  | -0.623 | 9.255  | -0.358 | 1.332  | -0.131 | 24.398 |
| GTF3C4   | 0.392  | 0.052  | -0.580 | 3.205  | 0.134  | 6.932  | 0.064  | 50.493 | 0.131  | 33.879 |
| GUCY1A3  | -0.890 | 0.052  | -0.400 | 3.009  | 0.510  | 1.309  | 0.291  | 41.825 | -0.731 | 0.021  |
| GUSB     | 0.041  | 54.154 | -0.189 | 5.829  | -0.086 | 58.074 | 0.132  | 27.828 | 0.626  | 0.021  |
| GZMM     |        |        | 0.383  | 7.537  | 0.074  | 41.103 | -0.214 | 19.971 | -0.645 | 0.039  |
| H1FX     | 1.142  | 0.171  | -0.119 | 5.829  | 0.250  | 12.575 | 0.105  | 41.825 | 0.449  | 0.746  |
| H6PD     | -0.244 | 0.398  | -0.360 | 0.829  | -0.170 | 2.311  | 0.097  | 19.971 | -0.058 | 33.879 |
| HADH     | -0.888 | 0.052  | -0.489 | 3.009  | 0.124  | 10.694 | 0.814  | 0.061  | 0.969  | 0.021  |
| HAO1     | -0.493 | 0.511  | 0.413  | 0.107  | 0.185  | 4.053  | -1.031 | 1.332  | -0.866 | 0.021  |
| HAPLN1   | -0.478 | 0.170  | 0.917  | 0.300  | 0.116  | 41.103 | 1.355  | 0.061  | -0.868 | 0.021  |
| HAS1     | -0.389 | 0.171  | -0.176 | 4.122  | -0.567 | 0.092  | 0.966  | 1.617  | -0.433 | 0.891  |
| HAS3     | 0.488  | 0.052  | 0.547  | 0.877  | 0.211  | 0.856  | 0.132  | 47.420 | -0.481 | 0.021  |
| HBEGF    | 0.121  | 12.647 | 0.253  | 5.829  | 0.174  | 3.475  | -0.422 | 0.177  | 0.363  | 8.002  |

|          |        |        |        |        |        |        |        |        |        |        |
|----------|--------|--------|--------|--------|--------|--------|--------|--------|--------|--------|
| HCFC1    | -0.747 | 0.052  | -0.366 | 5.829  | 0.322  | 5.705  | 0.260  | 4.906  | -0.121 | 24.398 |
| HCFC2    | 0.129  | 37.036 | 0.520  | 2.773  | -0.120 | 20.025 | -0.205 | 0.250  | 0.492  | 0.993  |
| HCK      | 0.539  | 0.170  | -0.366 | 6.703  | 0.127  | 4.053  |        |        | 0.978  | 0.021  |
| HCLS1    | 0.019  | 56.130 | -0.277 | 2.859  | 0.076  | 29.328 | 0.109  | 47.420 | 0.567  | 0.066  |
| HCN3     | -0.364 | 15.278 | -0.464 | 2.773  | -0.693 | 0.092  | 0.935  | 0.130  | -0.146 | 35.531 |
| HCRTR2   | -0.849 | 0.171  | -0.432 | 4.122  | -0.071 | 57.395 | -0.720 | 1.617  | -0.790 | 0.021  |
| HCST     | -0.053 | 57.367 | -0.150 | 0.784  | 0.297  | 2.056  | -0.476 | 0.061  | 1.244  | 0.021  |
| HDAC7    | -0.511 | 0.052  | -0.286 | 3.009  | 0.163  | 20.025 | -0.235 | 27.828 | 0.288  | 31.624 |
| HDAC8    | -0.157 | 3.157  | 0.290  | 8.881  | 0.143  | 49.127 | -0.288 | 11.241 | -0.750 | 0.021  |
| HDAC9    | -0.536 | 0.052  | -0.259 | 0.784  | -0.641 | 0.092  | -0.595 | 0.250  | -1.016 | 0.021  |
| HDC      | -1.365 | 0.052  | 0.759  | 0.300  | 0.494  | 12.575 | -0.063 | 50.493 | 1.183  | 0.021  |
| HDX      | -0.253 | 54.701 | -0.428 | 4.122  | -0.389 | 0.402  |        |        |        |        |
| HEATR3   | 0.226  | 0.171  | 0.529  | 3.205  | 0.147  | 22.899 | 0.459  | 0.506  | -0.926 | 0.021  |
| HECTD2   | 0.060  | 44.812 | 0.283  | 1.663  | -0.390 | 0.092  | -0.652 | 0.947  | -0.638 | 0.045  |
| HECW1    | -0.371 | 0.170  | -1.106 | 2.614  | 0.121  | 49.127 | 0.048  | 51.354 | 0.282  | 24.398 |
| HECW2    | 0.180  | 18.587 | 0.632  | 0.784  | 0.138  | 49.127 | 0.682  | 0.947  | -0.540 | 0.129  |
| HEG1     | 0.368  | 0.171  | -0.316 | 3.205  | -0.132 | 54.331 | -0.745 | 0.061  | 0.255  | 0.977  |
| HELB     | 0.238  | 4.284  | -0.125 | 5.829  | -0.266 | 8.121  | 0.172  | 41.825 | -0.641 | 0.021  |
| HELQ     | 0.225  | 37.036 | -0.287 | 4.122  | -0.442 | 2.311  | -1.137 | 0.061  | 0.034  | 43.609 |
| HERC1    | 0.353  | 1.936  | 0.352  | 3.205  | -0.556 | 0.092  | -0.677 | 0.061  | -0.122 | 14.822 |
| HEXB     | 0.064  | 44.812 | 0.154  | 1.663  | -0.133 | 9.255  | 0.161  | 19.971 | 0.579  | 0.021  |
| HFE      | 0.632  | 0.171  | 0.149  | 5.829  | 0.569  | 2.056  | 0.376  | 8.987  | 0.620  | 0.021  |
| HGF      | 0.065  | 44.812 | -0.453 | 0.122  | 0.470  | 0.440  | 0.025  | 53.829 | -0.043 | 44.052 |
| HHAT     | 0.114  | 25.771 | -0.293 | 4.122  | -0.085 | 36.892 | -0.561 | 0.061  | -0.065 | 40.051 |
| HHEX     |        |        |        |        |        |        |        |        | 1.435  | 0.021  |
| HIP1     | 0.200  | 37.036 | 0.283  | 3.009  | 0.065  | 41.103 | -0.077 | 49.358 | -0.618 | 0.021  |
| HIVEP3   | -0.769 | 0.126  | -0.370 | 4.122  | -0.253 | 3.068  | -0.864 | 0.061  | -0.382 | 0.084  |
| HJURP    | -0.787 | 0.126  | -0.923 | 3.205  | 0.304  | 33.124 | -0.640 | 23.450 | -0.745 | 0.166  |
| HK2      | 0.179  | 4.284  | -0.405 | 5.829  | 0.030  | 56.823 | 0.084  | 52.124 | 0.840  | 0.021  |
| HLA-B    | 1.142  | 0.171  | 0.314  | 2.123  | 0.250  | 12.575 | 0.105  | 41.825 | 0.503  | 0.021  |
| HLA-C    | 0.114  | 44.812 | -0.119 | 5.829  | -0.179 | 20.025 | -0.360 | 0.061  | 0.981  | 0.021  |
| HLA-DMB  | 0.424  | 3.157  | -0.350 | 0.267  | 0.711  | 0.402  | 0.550  | 23.450 | 0.888  | 0.021  |
| HLA-DOA  | -0.322 | 5.928  |        |        | 0.458  | 4.053  | 0.338  | 32.497 | 0.666  | 0.166  |
| HLA-DQB1 | 0.322  | 44.812 | 0.241  | 6.703  | 0.283  | 0.641  | -0.191 | 47.420 | 0.706  | 0.021  |
| HLA-E    | 0.198  | 21.797 | 0.234  | 2.773  | 0.128  | 22.899 |        |        | 0.399  | 0.119  |
| HLA-G    | 0.197  | 9.997  | -0.191 | 4.122  | -0.525 | 0.092  | -0.219 | 4.906  | 0.579  | 0.021  |
| HMCN1    | -0.259 | 0.930  |        |        | -0.566 | 0.440  | 0.052  | 52.656 | 0.534  | 0.066  |
| HMGA2    | -0.085 | 57.293 | -0.527 | 0.264  | -0.238 | 20.025 | -0.242 | 13.893 | -0.096 | 39.468 |
| HMGCR    | 0.309  | 44.812 | 0.663  | 0.669  | -0.376 | 0.092  | 0.327  | 47.420 | -0.919 | 0.084  |
| HMGXB4   | 0.252  | 0.170  | 0.780  | 0.569  | 0.562  | 0.092  | 0.134  | 41.825 | -0.145 | 24.398 |
| HMMR     | 0.109  | 49.540 | -0.712 | 0.514  |        |        | -0.466 | 32.497 | -0.256 | 14.822 |
| HN1L     | -0.319 | 49.540 | 0.233  | 4.122  | -0.451 | 0.092  | 0.395  | 1.210  | 0.787  | 0.391  |
| HNRNPAB  | -0.123 | 44.812 | 0.455  | 1.212  | -0.115 | 26.120 | -0.736 | 0.121  | -0.758 | 0.021  |
| HNRNPC   | -0.214 | 18.587 | 0.643  | 1.663  | -0.187 | 10.694 | -0.179 | 0.399  | -0.524 | 0.021  |
| HNRNPR   | -0.199 | 44.812 | 0.568  | 1.663  | -0.243 | 2.311  | -0.328 | 5.543  | -0.364 | 0.166  |
| HNRPDL   | 0.132  | 44.812 | 0.664  | 1.772  | -0.056 | 57.395 | -0.134 | 41.825 | -0.336 | 0.039  |
| HOMER1   | 0.311  | 0.930  | 0.633  | 0.986  | -0.166 | 26.120 | -0.397 | 0.573  | -0.287 | 0.391  |
| HOXA7    | -0.072 | 49.540 | -0.350 | 0.986  | 0.043  | 54.331 | 0.045  | 50.493 | -0.007 | 24.398 |
| HPS3     | -0.885 | 0.052  | 0.611  | 0.180  | -0.579 | 1.819  | 0.072  | 49.358 | -0.689 | 0.021  |
| HPS6     | 0.140  | 7.743  | 0.335  | 1.772  | 0.039  | 55.771 | 0.565  | 0.061  | 0.122  | 31.624 |
| HS1BP3   | 0.166  | 5.928  | -0.144 | 8.253  | 0.486  | 0.240  | -0.432 | 7.099  | 0.877  | 0.021  |
| HS2ST1   | 0.170  | 7.743  | 0.753  | 0.602  | 0.157  | 3.475  | 0.169  | 7.099  | -0.374 | 6.001  |
| HS3ST1   | 0.456  | 0.529  | -0.398 | 4.122  | -0.218 | 22.899 |        |        | 0.072  | 40.660 |
| HS3ST3B1 | -0.219 | 9.997  | -0.116 | 11.783 | -0.292 | 0.856  | 0.243  | 49.358 | 0.512  | 0.021  |
| HSD3B7   | -0.230 | 4.284  | 0.111  | 2.859  | -0.075 | 54.331 | -0.376 | 1.617  | 0.446  | 0.084  |
| HSP90B1  | 0.092  | 37.036 | -0.511 | 2.123  | -0.478 | 0.092  | 0.134  | 47.420 | -0.018 | 41.878 |
| HSPA12A  | 0.265  | 0.052  | -1.387 | 0.204  | 0.233  | 4.053  | 0.263  | 1.617  | -0.295 | 0.166  |
| HSPA2    | -0.115 | 12.647 | 0.705  | 0.180  | -0.160 | 14.770 | 0.146  | 3.866  | -0.413 | 4.218  |
| HSPA9    | 0.142  | 44.812 | 0.738  | 0.986  | -0.093 | 54.331 |        |        | -0.447 | 0.021  |
| HSPB1    |        |        | 0.280  | 1.772  | 0.305  | 0.402  | 0.241  | 8.987  | 0.756  | 0.021  |
| HSPB2    | 0.140  | 44.812 | 0.148  | 9.629  | 0.404  | 0.092  | 0.594  | 0.061  | 0.277  | 4.218  |
| HSPB3    | 0.305  | 0.780  | -0.473 | 1.457  | 0.146  | 29.328 | 0.406  | 16.936 | 0.484  | 0.039  |
| HSPB6    | 0.267  | 1.098  |        |        | 0.222  | 17.386 | 0.060  | 49.358 | 0.966  | 0.021  |
| HSPB8    | -0.226 | 49.540 | 0.312  | 2.859  | 0.918  | 0.402  | 0.404  | 0.130  | 0.868  | 0.891  |
| HTATIP2  | 0.475  | 0.780  | 0.407  | 1.534  | 0.164  | 1.819  | 0.202  | 16.936 | 0.073  | 42.670 |
| HTR3A    | 0.288  | 18.587 | 0.394  | 2.773  | 0.053  | 56.823 | 0.167  | 7.099  | -0.678 | 0.045  |
| HTR5B    | 0.139  | 44.812 | 0.490  | 0.614  | 0.334  | 1.098  | 0.027  | 52.656 | 0.653  | 0.993  |
| HTR6     | -0.193 | 25.771 | -0.555 | 0.784  | -0.296 | 5.705  | 0.026  | 54.831 | 0.407  | 0.084  |



|         |        |        |        |        |        |        |        |        |        |        |
|---------|--------|--------|--------|--------|--------|--------|--------|--------|--------|--------|
| HUS1    | -0.385 | 0.431  | -0.170 | 6.703  | -0.314 | 29.328 |        | 0.045  | 42.836 |        |
| HUWE1   | -0.177 | 3.157  | -0.402 | 0.784  | -0.721 | 0.641  | -0.300 | 41.825 | 0.168  | 31.624 |
| HYAL3   | -0.434 | 9.997  | -0.109 | 6.703  | 0.134  | 29.328 | 0.325  | 1.617  | 0.694  | 0.021  |
| HYI     | -0.304 | 0.262  | -0.265 | 4.122  |        |        | 0.271  | 3.866  | 0.587  | 0.269  |
| HYOU1   | -0.104 | 49.540 | -0.439 | 3.205  | 0.075  | 49.127 | 0.079  | 53.272 | 0.448  | 0.039  |
| IARS2   | 0.094  | 44.812 | 0.545  | 0.663  | -0.364 | 2.659  | 0.073  | 49.358 | 0.138  | 39.468 |
| ICAM1   | 0.035  | 51.013 | -0.227 | 3.205  | 0.352  | 2.056  | 0.531  | 0.341  | 1.175  | 0.021  |
| ICAM2   | 0.040  | 49.540 | 0.254  | 7.537  | 0.300  | 0.641  | -0.971 | 0.061  | -0.021 | 44.315 |
| ID1     |        |        |        |        | 0.219  | 22.899 | 0.091  | 32.497 | 0.994  | 0.021  |
| ID2     | 0.026  | 55.170 | 0.419  | 5.829  | 0.435  | 0.724  | 0.181  | 41.825 | 0.171  | 24.398 |
| ID3     | -0.283 | 49.540 | -0.144 | 4.122  | 0.080  | 33.124 | 0.450  | 0.130  | 0.736  | 0.021  |
| IDH2    | 0.385  | 0.450  | 0.271  | 5.829  | 0.170  | 1.309  | 0.206  | 47.420 | 0.176  | 4.218  |
| IDH3A   | 0.079  | 44.812 | 0.435  | 4.122  | -0.086 | 41.103 | -0.102 | 41.825 | -0.425 | 0.021  |
| IER2    | 0.502  | 0.052  | 0.423  | 0.514  | 0.285  | 1.556  | 0.458  | 11.241 | -0.391 | 0.649  |
| IER3    | 0.477  | 0.171  | 0.345  | 5.829  | 0.528  | 1.098  | 0.091  | 41.825 | 0.429  | 0.021  |
| IFI27L2 | 0.057  | 44.812 | -0.168 | 4.122  | 0.013  | 59.432 | 1.151  | 0.341  | 1.482  | 0.021  |
| IFI30   | 0.184  | 15.278 | 0.074  | 8.881  | 0.283  | 3.068  | -0.229 | 19.971 | 0.468  | 0.213  |
| IFIH1   | -0.179 | 44.812 | 0.218  | 8.253  |        |        | 0.708  | 0.061  | 0.674  | 0.021  |
| IFIT3   |        |        | 0.629  | 0.986  | -0.101 | 49.127 | -0.296 | 0.061  | 0.901  | 0.213  |
| IFITM2  | 0.033  | 52.218 | -0.580 | 0.514  | 0.218  | 2.311  | -0.155 | 8.987  | 0.656  | 0.021  |
| IFITM3  | -0.398 | 0.529  | 0.106  | 11.093 |        |        | 0.319  | 0.573  | 1.191  | 0.021  |
| IFNGR1  |        |        | -0.250 | 6.703  | 0.084  | 36.892 |        |        | 0.636  | 0.021  |
| IFT140  | -0.432 | 0.052  | 0.235  | 5.829  | -0.064 | 49.127 | 0.074  | 41.825 | 0.263  | 31.624 |
| IGF1    | 0.800  | 0.093  | 0.166  | 8.253  | 0.125  | 54.331 | 0.509  | 0.061  | 0.289  | 24.398 |
| IGF1R   | 0.392  | 0.093  | 0.287  | 1.457  | -0.470 | 41.103 | 0.049  | 50.493 | -0.129 | 33.879 |
| IGF2    | -0.640 | 0.052  | 0.413  | 0.514  | 0.137  | 14.770 | 0.058  | 53.272 | 0.337  | 0.471  |
| IGFBP2  | -0.130 | 49.540 | -0.098 | 8.881  | 0.186  | 26.120 | 0.159  | 3.866  | 0.577  | 0.021  |
| IGFBP3  | 0.245  | 0.262  | 0.438  | 0.944  | -0.562 | 0.092  | 0.144  | 19.971 | -0.392 | 0.119  |
| IGFBP5  | -0.369 | 2.450  | -0.278 | 3.205  | 0.155  | 12.575 | 0.399  | 0.947  | 1.287  | 0.021  |
| IGFBP6  | 0.228  | 9.997  |        |        | 0.369  | 2.056  | 0.189  | 2.415  | 0.733  | 0.129  |
| IGFBPL1 | -0.062 | 44.812 | -0.229 | 6.703  | -0.054 | 49.127 | 0.362  | 1.210  | 0.449  | 0.802  |
| IGHA1   | -0.133 | 37.036 | -0.938 | 0.663  | -0.395 | 29.328 | -0.274 | 2.913  | 0.423  | 11.001 |
| IGHM    | -0.072 | 44.812 | -0.512 | 0.784  | -0.208 | 0.856  | 0.209  | 0.727  | 0.443  | 0.084  |
| IGSF3   | -0.575 | 0.052  | -0.510 | 0.445  | -0.269 | 9.255  | 0.117  | 16.936 | 0.151  | 33.879 |
| IGSF6   | -0.307 | 7.743  | -0.133 | 5.829  | -0.186 | 54.331 | -0.146 | 23.450 | 0.840  | 0.021  |
| IL10RA  | 0.344  | 0.171  | 0.408  | 0.107  | 0.443  | 1.309  | -0.370 | 32.497 | 0.624  | 0.021  |
| IL10RB  | 0.256  | 9.997  | 0.456  | 2.123  | 0.113  | 8.121  | 0.374  | 0.061  | 0.590  | 0.021  |
| IL11RA  | -0.127 | 3.157  | -0.356 | 3.205  | 0.237  | 9.255  | -0.215 | 49.358 | 0.459  | 0.471  |
| IL15RA  | -0.063 | 33.231 | -0.603 | 0.614  | -0.048 | 54.331 | -0.057 | 41.825 | 0.189  | 31.624 |
| IL16    | -0.469 | 0.052  | -0.162 | 4.122  | -0.620 | 2.311  | 0.434  | 13.893 | -0.583 | 0.269  |
| IL17F   | 0.463  | 0.157  | -0.087 | 8.253  | 0.031  | 56.823 | -0.135 | 32.497 | 0.010  | 44.052 |
| IL18BP  | -0.181 | 18.587 | -0.284 | 3.205  | 0.159  | 22.899 | -0.347 | 1.878  | 0.563  | 0.021  |
| IL1RAP  | -0.423 | 0.052  | 0.410  | 0.514  | -0.507 | 0.092  | -0.525 | 1.332  | -0.482 | 0.993  |
| IL20RA  | -0.454 | 44.812 | -0.390 | 6.703  | 0.721  | 0.092  | 0.223  | 54.831 | -0.893 | 0.891  |
| IL20RB  | -0.714 | 0.093  | 0.462  | 0.354  | 0.473  | 0.092  | -0.886 | 0.061  | 0.396  | 31.624 |
| IL2RA   | -0.477 | 0.052  | 0.331  | 5.829  | 0.024  | 59.432 | -0.354 | 4.906  | 0.882  | 0.021  |
| IL33    | -0.164 | 3.157  | -0.140 | 11.093 | 0.047  | 54.331 | 0.143  | 5.543  | 0.444  | 0.213  |
| IL3RA   | 0.067  | 44.812 | -0.119 | 9.629  | -0.098 | 54.331 | -0.144 | 27.828 | 0.387  | 0.166  |
| IL4I1   | -0.055 | 51.013 | -0.080 | 11.093 | 0.038  | 54.331 | 0.281  | 4.906  | 0.679  | 0.021  |
| IL4R    | 0.200  | 15.278 |        |        | 0.537  | 0.733  | 0.063  | 52.656 | 0.276  | 11.001 |
| INADL   | -0.372 | 1.098  | -0.663 | 2.614  | 0.156  | 54.331 | -0.705 | 0.573  | 0.645  | 0.021  |
| INHA    | -0.067 | 44.812 | 0.347  | 2.123  | 0.088  | 54.331 | 0.136  | 41.825 | -0.907 | 0.021  |
| INHBA   | -0.232 | 21.797 | 0.287  | 5.829  | 0.462  | 0.092  | 0.074  | 19.971 | 0.377  | 14.822 |
| INPP5D  |        |        |        |        | -0.073 | 56.823 | 0.340  | 7.099  | 1.004  | 0.021  |
| INPP5K  | -0.378 | 2.450  | -0.641 | 0.935  | -0.084 | 54.331 | 0.083  | 47.420 | 0.182  | 36.831 |
| INSIG1  | -0.489 | 0.126  | 0.339  | 3.009  | -0.380 | 5.705  | -0.474 | 27.828 | -0.659 | 0.021  |
| INSM1   | 0.165  | 29.668 | 0.196  | 7.537  | 0.206  | 8.121  | -0.146 | 16.936 | -0.506 | 0.166  |
| INTS3   | -0.073 | 44.812 | -0.542 | 3.205  | 0.051  | 58.074 | 0.116  | 27.828 | 0.510  | 0.471  |
| IP6K1   | -0.087 | 52.218 | -0.097 | 10.404 | 0.078  | 49.127 | 0.583  | 0.061  | -0.226 | 1.193  |
| IPMK    | 0.213  | 33.231 | 0.612  | 0.107  | 0.148  | 12.575 | -0.161 | 4.906  | 0.328  | 14.822 |
| IPO5    | 0.260  | 12.647 | 0.818  | 0.877  | -0.099 | 33.124 | 0.186  | 23.450 | -0.404 | 0.021  |
| IQGAP1  | -0.495 | 0.052  | -0.226 | 4.122  | 0.067  | 29.328 | -0.126 | 54.403 | -0.179 | 33.879 |
| IQGAP3  | -0.393 | 12.647 | -0.205 | 0.784  | 0.635  | 0.092  | 0.876  | 8.987  | 0.926  | 0.649  |
| IRAK1   | 0.030  | 55.870 | 0.420  | 1.772  | -0.176 | 47.420 | -0.123 | 6.932  | -0.589 | 0.166  |
| IRF1    | -0.147 | 1.098  | 0.215  | 7.537  | 0.141  | 3.068  | 0.151  | 47.420 | 0.475  | 0.021  |
| IRF5    | -0.125 | 52.218 | -0.363 | 2.859  | 0.289  | 41.103 | 0.275  | 23.450 | 0.831  | 0.021  |
| IRF8    | -0.424 | 18.587 | 0.191  | 8.253  | -0.054 | 58.074 | 0.287  | 1.617  | 0.688  | 0.021  |
| IRF9    |        |        | 0.549  | 2.614  |        |        | -0.207 | 1.332  | 0.592  | 0.021  |

|               |        |        |        |        |        |        |        |        |        |        |
|---------------|--------|--------|--------|--------|--------|--------|--------|--------|--------|--------|
| IRGM          | 0.269  | 0.262  | 0.597  | 0.595  | 0.081  | 26.120 | 0.269  | 4.906  | 0.473  | 0.471  |
| Irgm2         | 0.029  | 56.874 | 0.287  | 0.300  | 0.327  | 2.659  |        |        | 0.761  | 0.021  |
| ISG15         | -0.135 | 44.812 | 0.275  | 1.086  | 0.336  | 0.281  | 0.102  | 53.272 | 0.487  | 0.129  |
| ISL1          | -0.935 | 0.529  | -0.338 | 2.859  | 0.081  | 49.127 | 0.139  | 19.971 | -0.151 | 24.398 |
| ISLR          | -0.531 | 0.666  | -0.140 | 5.829  | 0.091  | 36.892 | -0.149 | 52.124 | 0.397  | 0.993  |
| ISOC1         | -0.315 | 7.743  | 0.331  | 3.205  | -0.086 | 41.103 | -0.244 | 7.099  | -0.505 | 0.119  |
| ITGA3         | 0.413  | 5.928  | -0.673 | 2.614  | -0.223 | 2.311  | 0.076  | 53.829 | -0.435 | 0.307  |
| ITGA4         | 0.162  | 29.668 | -0.988 | 0.107  | -0.238 | 12.575 | -0.784 | 1.878  | 0.380  | 0.021  |
| ITGA7         | 0.668  | 0.052  | -0.327 | 0.944  | -0.349 | 20.025 | 0.294  | 47.420 | -0.191 | 31.624 |
| ITGA9         | -0.292 | 44.812 | -0.174 | 2.614  | -0.133 | 22.899 | -0.636 | 5.543  | 0.446  | 0.269  |
| ITGAX         | -0.082 | 37.036 | -0.343 | 0.784  | 0.010  | 60.231 | -0.025 | 54.403 | 1.220  | 0.021  |
| ITGB1         | 0.288  | 0.780  | 0.602  | 0.180  | 0.079  | 36.892 | 0.259  | 4.906  | 0.116  | 24.398 |
| ITGB2         | -0.114 | 7.743  | -0.276 | 0.784  | 0.014  | 59.432 | -0.115 | 27.828 | 0.576  | 0.021  |
| ITGB3         | -0.225 | 5.928  | -0.393 | 0.784  | 0.439  | 12.575 | -1.062 | 0.061  | 0.670  | 0.021  |
| ITGB4         | -0.437 | 18.587 | 0.098  | 11.093 |        |        | 0.509  | 0.061  | 0.313  | 24.398 |
| ITGB5         | -0.066 | 54.701 | -0.378 | 2.614  | -0.032 | 58.406 | -0.087 | 49.358 | 0.677  | 0.021  |
| ITIH3         | -0.232 | 9.997  | 0.295  | 3.009  | -0.419 | 0.281  | 0.119  | 11.241 | 0.605  | 0.021  |
| ITIH5         | -0.132 | 25.771 | -0.083 | 10.404 | 0.197  | 9.255  | -0.089 | 27.828 | 0.490  | 0.746  |
| ITPR3         | -0.196 | 18.587 | -0.840 | 1.772  |        |        | 0.121  | 47.420 | 0.646  | 0.021  |
| JAK3          | -0.360 | 21.797 | 0.221  | 5.829  | 0.227  | 0.641  | 0.370  | 1.210  | 0.617  | 0.021  |
| JAKMIP2       |        |        | -0.535 | 0.514  | -0.393 | 1.819  | 0.065  | 41.825 | -0.446 | 0.307  |
| JHDM1D        | 0.431  | 0.052  | 0.390  | 2.300  | 0.338  | 2.659  | -0.467 | 0.130  | 0.608  | 0.021  |
| JMJD7-PLA2G4B | 0.291  | 0.126  | 0.657  | 0.107  | 0.318  | 0.402  | -0.106 | 47.420 | -0.711 | 0.021  |
| JMY           | 0.016  | 56.130 | -0.406 | 3.205  | -0.058 | 58.074 | -0.401 | 7.099  | -0.557 | 0.021  |
| JTB           | 0.031  | 56.130 | 0.472  | 0.107  | 0.018  | 58.611 | 0.113  | 41.825 | 0.085  | 31.624 |
| JUN           | -0.359 | 0.398  | 0.322  | 0.595  | 0.311  | 0.517  | 0.080  | 41.825 | 1.011  | 0.021  |
| JUND          | 0.153  | 33.231 |        |        | 0.114  | 41.103 | 0.324  | 19.971 | 0.503  | 0.039  |
| KATNAL1       | -0.102 | 37.036 |        |        | 0.151  | 49.127 | 0.230  | 47.420 | -0.602 | 0.269  |
| KATNAL2       | -0.234 | 0.093  | 0.598  | 1.289  | 0.056  | 54.331 | 0.184  | 23.450 | -1.148 | 0.021  |
| KAZN          | -0.382 | 0.431  | 0.233  | 2.300  | 0.189  | 4.053  | 0.141  | 49.358 | 0.464  | 0.307  |
| KCNC1         | 0.194  | 49.540 | -0.363 | 4.122  | 0.134  | 20.025 | -0.109 | 27.828 | -0.478 | 0.039  |
| KCNF1         | -0.568 | 0.171  | 0.693  | 0.264  | 0.501  | 49.127 | 0.058  |        | -0.327 | 31.624 |
| KCNG2         | -0.084 | 55.170 |        |        |        |        | -0.190 | 16.936 | -0.517 | 0.993  |
| KCNH1         | -0.398 | 12.647 | 0.601  | 0.514  | -0.180 | 12.575 | -0.418 | 27.828 | -0.842 | 0.021  |
| KCNH3         | 0.057  | 53.690 |        |        | 0.029  | 58.074 | -0.245 | 19.971 | -0.378 | 0.269  |
| KCNJ12        | -0.473 | 7.743  |        |        | 0.382  | 1.309  | -0.201 | 52.124 | 0.637  | 0.193  |
| KCNJ16        | -0.030 | 57.367 |        |        |        |        |        |        | -0.573 | 0.993  |
| KCNJ3         | 0.278  | 0.398  | 0.541  | 2.123  | -0.126 | 41.103 | 0.130  | 47.420 | -0.493 | 0.129  |
| KCNK6         | -0.398 | 0.052  | 0.180  | 0.514  | 0.048  | 54.331 |        |        | 0.873  | 0.021  |
| KCNMA1        | 0.059  | 49.540 | 0.343  | 6.703  | -0.107 | 54.331 | -0.095 | 41.825 | -0.400 | 0.307  |
| KCNQ1OT1      | -0.493 | 0.324  | -0.101 | 3.205  | -0.486 | 0.092  | -0.430 | 7.099  | -0.789 | 0.021  |
| KCNT2         | -0.246 | 2.450  | 0.216  | 4.122  | 0.079  | 49.127 | 0.162  | 47.420 | -0.572 | 0.066  |
| KCTD7         | -0.056 | 52.218 | 0.571  | 0.944  | -0.239 | 1.309  | -0.380 | 2.415  | 0.313  | 31.624 |
| KDM2A         | -0.204 | 0.511  | -0.335 | 4.122  | -0.530 | 0.641  | -0.216 | 5.543  | -0.462 | 0.993  |
| KDM2B         | 0.077  | 49.540 | 0.535  | 0.264  | 0.203  | 4.733  | 0.430  | 0.341  | -0.259 | 2.886  |
| KDM5B         | -0.200 | 1.936  | 0.415  | 5.829  | -0.182 | 14.770 | -0.376 | 0.573  | -0.354 | 0.129  |
| KDM6B         | -0.121 | 37.036 |        |        | 0.098  | 41.103 | -0.773 | 0.061  | -0.116 | 24.398 |
| KDR           | -0.286 | 0.093  | -0.330 | 4.122  | 0.138  | 3.475  | -0.103 | 54.403 | -0.832 | 0.021  |
| KHDRBS2       | -0.233 | 7.743  | 0.105  | 11.093 | 0.398  | 4.053  | 0.105  | 23.450 | -0.127 | 44.315 |
| KIAA0090      | -0.120 | 44.812 | 0.506  | 0.986  | 0.138  | 9.255  | 0.229  | 7.099  | 0.139  | 24.398 |
| KIAA0101      | -0.670 | 0.093  | -0.930 | 1.029  | -0.493 | 1.309  | -0.612 | 0.353  | 0.549  | 0.021  |
| KIAA0182      | 0.067  | 49.540 | -0.354 | 3.205  | 0.133  | 10.694 |        |        | 0.577  | 0.119  |
| KIAA0247      | 0.128  | 12.647 | 0.201  | 8.881  | 0.401  | 1.098  | -0.487 | 0.061  | 0.099  | 33.879 |
| KIAA0319      | 0.058  | 54.154 | 0.522  | 1.534  | -0.304 | 0.092  | 0.045  | 47.420 | -0.430 | 0.391  |
| KIAA0368      | -0.735 | 0.171  | 0.566  | 0.784  | -0.189 | 49.127 | 0.293  | 1.617  | -1.225 | 0.021  |
| KIAA0913      | -0.223 | 0.780  | 0.337  | 2.614  | -0.062 | 54.331 | -0.075 | 41.825 | -0.610 | 0.045  |
| KIAA0922      | -1.328 | 0.052  | 0.402  | 5.829  | -0.639 | 0.724  | -0.476 | 49.358 | -0.421 | 0.119  |
| KIAA0947      | 0.016  | 55.559 | 0.521  | 3.009  | 0.039  | 54.331 | -0.229 | 0.573  | -0.414 | 0.021  |
| KIAA1009      | -0.512 | 0.052  | -0.505 | 0.944  | 0.204  | 14.770 | -0.726 | 0.855  | 0.761  | 0.021  |
| KIAA1109      | -0.157 | 12.647 | -0.307 | 6.703  | -0.286 | 2.056  | -0.472 | 0.250  | -0.537 | 0.021  |
| KIAA1199      | -0.434 | 0.052  | 0.656  | 0.264  | 0.258  | 2.056  | -0.282 | 19.971 | -0.929 | 0.993  |
| KIAA1324      | 0.055  | 49.540 | 0.762  | 0.445  | 0.151  | 8.121  | 0.041  | 49.358 | 0.157  | 14.822 |
| KIAA1377      | 0.494  | 0.171  | 0.521  | 2.123  | -0.060 | 58.406 | 0.099  | 47.420 | -0.294 | 1.977  |
| KIAA1456      | 0.083  | 44.812 | 0.481  | 0.595  |        |        | 0.117  | 47.420 | -0.193 | 1.977  |
| KIAA1804      | -0.167 | 4.284  | 0.384  | 4.122  | -0.130 | 8.121  | 0.502  | 0.061  | -0.129 | 8.002  |
| KIAA1958      | 0.191  | 1.098  | 0.396  | 0.514  | 0.162  | 26.120 | -0.128 | 41.825 | 0.419  | 0.066  |
| KIF1B         | -0.440 | 0.052  | 0.558  | 1.289  | -0.308 | 4.053  | -0.368 | 47.420 | 0.361  | 0.129  |
| KIF1C         | -0.189 | 21.797 | -0.693 | 0.534  | -0.131 | 26.120 | 0.239  | 11.241 | 0.223  | 24.398 |

|          |        |        |        |        |        |        |        |        |        |        |
|----------|--------|--------|--------|--------|--------|--------|--------|--------|--------|--------|
| KIF26B   | -0.742 | 0.052  | 0.202  | 0.514  |        |        | -0.951 | 0.250  | -0.012 | 44.315 |
| KIF2A    | -0.259 | 0.171  | 0.667  | 0.300  | -0.134 | 4.053  | 0.128  | 47.420 | -0.200 | 4.218  |
| KIF5C    | -0.300 | 0.666  | 0.282  | 1.289  | 0.167  | 49.127 | -0.576 | 7.099  | -0.281 | 8.002  |
| KIFAP3   | -0.247 | 0.780  | -0.508 | 1.663  | -0.283 | 0.856  | -0.227 | 1.878  | -0.451 | 0.021  |
| KIFC3    | 0.094  | 29.668 |        |        | 0.118  | 8.121  | -0.510 | 0.353  | 0.343  | 0.084  |
| KIT      | -0.829 | 0.052  | 0.685  | 0.204  | 0.115  | 41.103 | 0.154  | 19.971 | -0.763 | 0.021  |
| KLC2     | -0.036 | 52.827 | -0.391 | 0.859  | 0.033  | 54.331 | 0.081  | 47.420 | 0.004  | 44.052 |
| KLF13    | -0.580 | 0.666  | -1.199 | 0.935  | 0.120  | 36.892 | 0.091  | 47.420 | 0.229  | 31.624 |
| KLF3     | -0.163 | 44.812 | 0.543  | 1.289  | -0.400 | 0.240  | -0.178 | 47.420 | 0.772  | 0.045  |
| KLF4     | -0.154 |        | -0.561 | 4.122  | 0.402  | 0.724  | -0.128 | 49.358 | 0.004  | 44.052 |
| KLHDC5   | 0.746  | 0.052  | 0.569  | 0.107  | 0.357  | 0.092  | -0.690 | 0.061  | -0.677 | 0.066  |
| KLHL21   | 0.370  | 2.450  | 0.417  | 0.784  | -0.092 | 17.386 | 0.324  | 0.399  | -0.065 | 31.624 |
| KLK6     | -0.065 | 54.701 | -0.576 | 2.614  | -0.208 | 10.694 | 0.413  | 1.210  | 1.188  | 0.021  |
| KLK7     | 0.317  | 0.262  | -0.405 | 1.086  | 0.166  | 9.255  | 0.250  | 41.825 | 0.656  | 0.166  |
| KLK9     | 0.084  | 44.812 | -0.245 | 4.122  | 0.117  | 9.255  | 0.243  | 32.497 | 0.453  | 0.886  |
| KPNA3    | -0.085 | 54.701 | -0.455 | 0.514  | -0.083 | 41.103 | 0.043  | 53.829 | -0.315 | 0.119  |
| KPNA4    | 0.146  | 51.013 | -0.401 | 2.859  | -0.674 | 0.092  | -0.108 | 7.099  | 0.406  | 0.993  |
| KPNB1    | 0.069  | 49.540 | -0.224 | 3.009  | 0.061  | 54.331 | 0.098  | 41.825 | 0.667  | 0.066  |
| KRAS     | -0.161 | 5.928  | 0.559  | 5.829  | -0.111 | 17.386 | -0.232 | 0.573  | -0.633 | 0.021  |
| KREMEN1  | -0.769 | 0.398  | 0.300  | 2.123  | 0.291  | 1.556  | -1.616 | 0.061  | 0.316  | 42.670 |
| KRIT1    | -0.568 | 0.398  | 0.418  | 4.122  | -0.116 | 58.406 | -0.310 | 1.878  | -0.775 | 0.021  |
| KRR1     | -0.269 | 0.511  | 0.885  | 0.877  | 0.101  | 20.025 | -0.453 | 1.617  | -0.666 | 0.021  |
| KRT2     | -0.319 | 25.771 | 0.391  | 0.445  | 0.876  | 0.402  | 0.453  | 41.825 | -0.350 | 31.624 |
| KRT79    | -0.177 | 52.218 | 0.385  | 0.669  | 0.882  | 0.517  | 0.434  | 0.061  | -0.453 | 24.398 |
| LAG3     |        |        |        |        | 0.469  | 3.475  | 0.038  | 52.124 | 1.210  | 0.021  |
| LAIR1    | -0.291 | 0.171  | -0.822 | 0.784  | 0.362  | 1.556  | -0.728 | 0.061  | 1.192  | 0.039  |
| LAMA3    | 0.446  | 0.052  | -0.199 | 3.205  | 0.463  | 0.092  | 0.278  | 1.878  | 0.204  | 31.624 |
| LAMA5    | -0.413 | 0.052  | 0.329  | 5.829  | 0.053  | 56.823 | -0.380 | 19.971 | 0.231  | 44.203 |
| LAMB2    | 0.058  | 49.540 | 0.516  | 1.772  | 0.348  | 1.309  |        |        | 0.423  | 0.021  |
| LAMP2    | -0.094 | 52.218 | 0.278  | 1.457  | -0.149 | 6.932  | -0.204 | 23.450 | 0.460  | 0.398  |
| LANCL1   | 0.105  | 29.668 | 0.677  | 2.300  |        |        | -0.292 | 0.061  | -0.493 | 0.021  |
| LANCL2   | 0.110  | 52.218 | 0.414  | 0.174  | -0.101 | 36.892 | 0.599  | 1.878  | 1.139  | 0.021  |
| LAPTMS5  | -0.134 | 3.157  |        |        | -0.292 | 33.124 |        |        | 1.024  | 0.021  |
| LARP4    | 0.162  | 18.587 | 0.723  | 0.514  | -0.155 | 36.892 | -0.146 | 27.828 | -0.411 | 0.391  |
| LARS     | -0.768 | 0.052  | 0.635  | 0.944  | -0.760 | 0.092  | 0.110  | 41.825 | 0.171  | 31.624 |
| LASP1    | 0.214  | 18.587 | -0.192 | 4.122  | 0.328  | 0.402  | -0.269 | 0.341  | 0.484  | 0.119  |
| LAT2     | 0.153  | 53.690 | -0.238 | 1.663  | 0.319  | 0.092  | -0.400 | 41.825 | 0.914  | 0.021  |
| LCAT     | -0.142 | 52.827 | 0.165  | 10.404 | 0.418  | 0.733  | -0.128 | 8.987  | 0.276  | 24.398 |
| LCn2     |        |        |        |        |        |        |        |        | 1.554  | 0.021  |
| LCP1     | -0.682 | 1.098  | 0.104  | 9.629  | 0.048  | 58.928 | 0.277  | 4.906  | 0.769  | 0.021  |
| LDB2     | -0.270 | 2.450  | -0.160 | 5.829  | 0.389  | 0.724  | -0.224 | 0.250  | -0.182 | 33.879 |
| LDLR     | -0.051 | 53.690 | -0.175 | 0.784  | -0.448 | 0.092  | -0.081 | 47.420 | 0.064  | 41.258 |
| LDLRAP1  | 0.415  | 0.052  | 0.059  | 12.522 | 0.268  | 33.124 | -0.368 | 27.828 | 0.603  | 0.021  |
| LEFTY1   |        |        | 0.323  | 5.829  | 0.042  | 58.074 |        |        | 1.649  | 0.021  |
| LEPREL4  | 0.016  | 57.109 | 0.229  | 0.595  | -0.173 | 54.331 | 0.431  | 0.947  | -0.110 | 24.398 |
| LGALS1   | -0.128 | 7.743  | -0.325 | 3.205  | 0.171  | 36.892 |        |        | 0.794  | 0.021  |
| LGALS3   | -0.022 | 57.293 | -0.227 | 4.122  | -0.084 | 41.103 | -0.076 | 32.497 | 0.950  | 0.021  |
| LGALS3BP | 0.016  | 56.765 | -0.351 | 4.122  | 0.166  | 3.475  | 0.653  | 0.061  | 1.135  | 0.021  |
| LGALS4   | -0.686 | 0.398  | 1.055  | 0.107  | 0.271  | 0.724  | 0.427  | 11.241 | 0.387  | 0.746  |
| LGI1     | -0.239 | 0.398  | 0.528  | 2.773  | -0.263 | 29.328 | 0.292  | 5.543  | -0.673 | 0.471  |
| LGI4     | -0.110 | 44.812 | 0.134  | 4.122  | -0.063 | 54.331 | 0.501  | 0.399  | 0.324  | 14.822 |
| LGR5     | 0.933  | 0.262  | -0.408 | 0.784  | -0.540 | 4.733  |        |        | -0.457 | 6.001  |
| LHX9     | -0.741 | 0.052  | 0.204  | 2.123  | -0.898 | 0.092  | -0.208 | 4.906  | -1.206 | 0.021  |
| LIG3     | 0.282  | 0.930  | -0.654 | 0.514  | 0.059  | 54.331 | 0.114  | 41.825 | 0.161  | 35.531 |
| Lilrb3   | 0.049  | 49.540 | -0.717 | 0.514  |        |        | 0.053  | 50.493 | 1.255  | 0.021  |
| LIMA1    | -0.466 | 0.052  | 0.413  | 0.602  | 0.012  | 60.505 | -0.317 | 32.497 | 0.854  | 0.021  |
| LIMD1    | 0.142  | 25.771 | 0.178  | 2.614  | 0.079  | 36.892 | 0.451  | 0.061  | 0.311  | 2.886  |
| LIME1    | 0.029  | 52.827 | -0.499 | 0.205  | 0.050  | 55.771 | 0.128  | 32.497 | 0.188  | 11.001 |
| LIMK1    | -0.410 | 0.171  | -0.489 | 3.009  |        |        |        |        | 0.090  | 33.879 |
| LIMS2    | 0.110  | 49.540 | -0.180 | 8.253  | 0.049  | 54.331 | 0.262  | 0.292  | 0.396  | 0.045  |
| LIN28B   |        |        | -0.393 | 0.784  | -0.323 | 17.386 | -0.541 | 32.497 | -0.094 | 40.051 |
| LIN7A    | 0.490  | 0.171  | 0.824  | 0.595  | 0.283  | 1.556  | 0.101  | 49.358 | -0.618 | 0.269  |
| LINGO2   | -0.507 | 0.052  | -0.362 | 0.204  | 0.266  | 41.103 | 0.202  | 2.415  | -0.321 | 8.002  |
| LIPE     | 0.103  | 44.812 | -0.889 | 2.859  | -0.128 | 22.899 | 0.394  | 0.341  | 0.320  | 24.398 |
| LITAF    | -0.338 | 0.093  | 0.221  | 0.514  | 0.045  | 57.395 | -0.325 | 0.177  | 0.560  | 0.977  |
| LMAN2    | -0.063 | 44.812 | 0.467  | 0.514  | -0.070 | 58.406 | -0.125 | 23.450 | -0.514 | 0.166  |
| LMCD1    | 0.097  | 37.036 | 0.195  | 5.829  | -0.071 | 56.823 | 0.735  | 0.061  | -0.109 | 37.824 |
| LMNB1    | -0.228 | 0.262  | 0.286  | 5.829  | -0.127 | 3.475  | -0.853 | 0.121  | -0.650 | 0.977  |

|                     |        |        |        |        |        |        |        |        |        |        |
|---------------------|--------|--------|--------|--------|--------|--------|--------|--------|--------|--------|
| LMNB2               | 0.201  | 12.647 | -0.401 | 4.122  | 0.661  | 0.092  | -0.607 | 1.617  | 0.927  | 0.021  |
| LMO3                | 0.163  | 12.647 | 0.506  | 0.514  | -0.082 | 29.328 | -0.097 | 32.497 | -0.194 | 31.624 |
| LMO4                | -0.083 | 37.036 | -0.144 | 5.829  | -0.044 | 58.928 | -0.281 | 41.825 | -0.420 | 0.084  |
| LMTK2               | 0.211  | 0.930  | 0.536  | 0.107  | 0.448  | 0.092  | 0.232  | 19.971 | 0.588  | 0.391  |
| LOC100505793/SRSF10 | -0.096 | 18.587 | 0.670  | 2.300  | -0.140 | 58.074 | -0.900 | 0.177  | -0.262 | 4.218  |
| LOC390760           | -0.345 | 0.324  | 0.286  | 0.514  | 0.079  | 56.823 | -0.559 | 1.210  | -0.400 | 8.002  |
| LPAR4               |        |        | 0.162  | 9.629  | -0.484 | 0.092  | 0.131  | 7.099  | -0.358 | 31.624 |
| LPAR6               | -0.564 | 0.052  | -0.710 | 0.484  | -0.295 | 10.694 | -0.473 | 0.353  | 0.104  | 42.212 |
| LPCAT2              | -0.080 | 49.540 | -0.110 | 5.829  | -0.099 | 49.127 | -0.220 | 23.450 | 0.552  | 0.045  |
| LPGAT1              | -0.213 | 0.171  | 0.047  | 10.404 | -0.146 | 14.770 | -0.078 | 49.358 | -0.353 | 0.066  |
| LPHN1               | -0.193 | 0.511  | -0.563 | 2.123  | 0.087  | 41.103 | -0.080 | 27.828 | -0.484 | 0.649  |
| LPHN2               | -0.102 | 52.827 | 0.190  | 3.205  | 0.416  | 0.856  | -0.243 | 23.450 | 0.238  | 42.030 |
| LPIN2               | 0.262  | 1.431  | 0.450  | 0.107  | 0.052  | 41.103 | -0.452 | 3.866  | -0.208 | 0.213  |
| LPL                 | 0.221  | 7.743  | 0.212  | 2.614  | -0.166 | 4.733  | -0.310 | 5.543  | -0.518 | 0.021  |
| LPP                 | 0.516  | 5.928  | 0.664  | 0.107  | -0.512 | 0.092  | -1.402 | 0.061  | -0.343 | 24.398 |
| LPXN                | -0.228 | 51.013 | 0.746  | 0.944  | 0.025  | 58.074 | -0.308 | 50.493 | 1.386  | 0.021  |
| LRCH1               | -0.263 | 0.666  | -0.140 | 10.404 | -0.158 | 22.899 | 0.327  | 0.061  | -0.437 | 0.021  |
| LRIG2               | 0.560  | 0.093  | 0.183  | 5.829  | -0.183 | 4.053  | 0.171  | 52.124 | 0.523  | 0.021  |
| LRIG3               | 0.083  | 25.771 | -0.279 | 9.629  |        |        |        |        | -0.437 | 0.471  |
| LRP2                | 0.110  | 15.278 | -0.184 | 2.614  | -0.969 | 0.856  | 0.345  | 16.936 | -0.346 | 31.624 |
| LRP8                | -0.111 | 57.293 | 0.607  | 0.180  | 0.068  | 58.406 | -0.779 | 11.241 | 0.278  | 33.879 |
| LRRC15              | 0.044  | 49.540 | -0.415 | 0.205  | 0.102  | 49.127 | 0.126  | 2.913  | 0.103  | 31.624 |
| LRRC28              | 0.194  | 3.157  | 0.368  | 0.514  | -0.278 | 1.556  | -0.715 | 0.061  | -0.583 | 0.084  |
| LRRC46              | -0.086 | 37.036 | 0.089  | 8.253  | 0.201  | 6.932  | 0.502  | 0.921  | 0.070  | 38.751 |
| LRRC7               | 0.133  | 12.647 | 0.670  | 1.457  | 0.139  | 4.733  | 0.064  | 47.420 | -0.396 | 0.471  |
| LRRK2               | -0.231 | 0.529  | 0.121  | 11.783 | 0.173  | 5.705  | -0.517 | 0.061  | -0.408 | 0.119  |
| LRRN3               | 0.213  | 33.231 | 0.481  | 0.514  | -0.158 | 4.733  | 0.291  | 1.210  | -0.297 | 2.886  |
| LRRN4               | -0.244 | 49.540 | 0.527  | 2.123  | -0.093 | 49.127 | -0.908 | 0.061  | -0.194 | 36.831 |
| LRRTM3              | -0.751 | 0.398  | 0.550  | 0.784  | 0.141  | 55.771 | -0.948 | 2.415  | -0.502 | 0.166  |
| LSS                 | 0.110  | 44.812 | 0.727  | 1.212  | 0.099  | 49.127 | -0.425 | 11.241 | -0.391 | 0.746  |
| Lst1                | -0.093 | 37.036 | -0.392 | 3.205  | 0.327  | 0.724  | -0.057 | 41.825 | 0.916  | 0.021  |
| LTBP3               | -0.106 | 12.647 | -0.543 | 2.859  | 0.124  | 49.127 | 0.123  | 2.415  | 0.452  | 0.066  |
| LTBR                | 0.036  | 49.540 | 0.484  | 0.595  | -0.063 | 55.771 | 0.591  | 0.292  | 0.937  | 0.021  |
| LTC4S               | 0.131  | 44.812 | -0.095 | 8.881  | 0.196  | 0.856  |        |        | 0.627  | 0.021  |
| LTK                 | 0.082  | 52.827 |        |        | 0.286  | 1.819  | -0.356 | 0.727  | -0.215 | 14.822 |
| LTN1                | 0.173  | 7.743  | -0.421 | 0.514  | 0.053  | 54.331 | 0.114  | 19.971 | -0.172 | 24.398 |
| LUC7L               | 0.127  | 18.587 | 0.614  | 0.595  | -0.161 | 14.770 | -0.301 | 1.617  | -0.257 | 31.624 |
| LY6E                | 0.056  | 51.013 |        |        | -0.124 | 49.127 | 0.043  | 51.354 | -0.546 | 0.119  |
| LY86                | -0.570 | 0.170  | -0.191 | 8.881  | -0.063 | 58.074 | 0.132  | 5.543  | 1.361  | 0.021  |
| LY96                | -0.712 | 4.284  | 0.124  | 2.300  | 0.291  | 2.056  | 0.962  | 0.061  | 0.670  | 0.021  |
| LYL1                | 0.089  | 37.036 | -0.119 | 10.404 | -0.103 | 58.928 | 0.438  | 2.913  | 0.744  | 0.021  |
| LYN                 | 0.353  | 0.052  | 0.665  | 0.669  | 0.233  | 0.659  | 0.112  | 7.099  | 0.511  | 0.993  |
| LYVE1               | -0.140 | 29.668 | -0.832 | 1.663  | 0.310  | 20.025 | -0.218 | 0.506  | -0.523 | 0.307  |
| Lyz1/Lyz2           | 0.106  | 49.540 | -0.338 | 3.009  | -0.312 | 0.281  | 0.245  | 0.177  | 1.476  | 0.021  |
| LZTS1               | -0.169 | 15.278 | -0.751 | 0.602  | 0.210  | 33.124 | -0.908 | 0.061  | 0.420  | 11.001 |
| MAD2L1              | 0.288  | 0.511  | 0.352  | 2.859  | 0.157  | 17.386 | 0.285  | 7.099  | -0.393 | 0.891  |
| MADD                | -0.212 | 1.098  | -0.116 | 6.703  | 0.068  | 41.103 | 0.075  | 41.825 | 0.458  | 0.084  |
| MAEL                | -0.183 | 29.668 |        |        | -0.531 | 2.056  | -1.249 | 0.061  | 0.266  | 8.002  |
| MAF                 | 0.668  | 1.098  | -0.439 | 2.859  | 0.266  | 9.255  | -0.315 | 0.061  | 0.444  | 0.993  |
| MAFB                | 0.115  | 49.540 | -0.124 | 8.253  | -0.071 | 58.928 | 0.127  | 32.497 | 0.621  | 0.021  |
| MAFF                | -0.448 | 18.587 | 0.588  | 0.204  | 0.510  | 0.092  | -0.418 | 1.878  | 0.956  | 0.021  |
| MAFG                | 0.277  | 0.171  | 0.397  | 0.445  | 0.279  | 4.733  | -0.540 | 3.866  | -0.056 | 35.531 |
| MAGI2               | 0.034  | 52.827 | -0.227 | 3.205  | 0.050  | 49.127 | 0.091  | 51.354 | 0.499  | 0.021  |
| MAGT1               | -0.058 | 44.812 | 0.411  | 2.123  | 0.075  | 55.771 | 0.404  | 16.936 | 0.800  | 0.084  |
| MAL2                | -0.049 | 55.870 |        |        | 0.507  | 0.517  | -0.283 | 11.241 | 0.160  | 38.751 |
| MALAT1              | -0.787 | 0.170  | 0.451  | 5.829  | -0.870 | 0.092  | -1.325 | 0.061  | 0.510  | 0.021  |
| MAMDC2              | -0.112 | 44.812 |        |        | -0.110 | 14.770 |        |        | 0.825  | 0.021  |
| MAML1               | 0.466  | 0.936  | 0.171  | 5.829  | -0.106 | 54.331 | -0.058 | 54.403 | 0.213  | 2.886  |
| MAN2A2              | -0.311 | 2.450  | 0.360  | 2.300  | 0.316  | 3.068  | -0.240 | 47.420 | 0.506  | 0.021  |
| MAN2B1              | -0.054 | 52.827 | -0.234 | 2.300  | -0.079 | 58.406 | 0.127  | 27.828 | 0.641  | 0.021  |
| MAN2B2              | -0.100 | 52.218 |        |        | 0.079  | 49.127 | 0.133  | 47.420 | 0.529  | 0.021  |
| MAOB                | -0.319 | 0.780  | -0.564 | 0.893  | -0.224 | 0.641  | 0.082  | 32.497 | 0.437  | 41.258 |
| MAP1B               | -0.102 | 44.812 | -0.440 | 1.086  | -0.407 | 0.240  | 0.045  | 53.829 | 0.115  | 31.624 |
| MAP2                | 0.162  | 44.812 | -0.604 | 4.122  | -0.333 | 20.025 | -1.073 | 0.061  | -0.507 | 0.021  |
| MAP2K1              | 0.013  | 56.130 | 0.493  | 1.663  | 0.052  | 55.771 |        |        | -0.450 | 0.021  |
| MAP2K6              | -0.458 | 0.052  | -0.441 | 1.457  | 0.051  | 57.395 | 0.398  | 47.420 | 0.041  | 42.670 |
| MAP3K1              | -0.430 | 0.171  | 0.250  | 5.829  | -0.199 | 36.892 | -0.256 | 0.353  | 0.611  | 0.066  |
| MAP3K14             | 0.610  | 0.262  | 0.462  | 0.514  | -0.073 | 41.103 | -0.517 | 0.061  | -0.187 | 31.624 |

|           |        |        |        |        |        |        |        |        |        |        |
|-----------|--------|--------|--------|--------|--------|--------|--------|--------|--------|--------|
| MAP3K2    | 0.210  | 15.278 | -0.265 | 4.122  | -0.627 | 0.092  | -0.269 | 41.825 | 0.329  | 24.398 |
| MAP3K9    | -0.350 | 4.284  | -0.135 | 5.829  | -0.142 | 9.255  | 0.125  | 50.493 | 0.843  | 0.021  |
| MAP4K3    | -0.274 | 0.666  | 0.536  | 1.457  | -0.294 | 17.386 | -0.341 | 0.727  | -0.498 | 0.084  |
| MAP4K5    | -0.329 | 15.278 | 0.734  | 0.514  | 0.103  | 41.103 | 0.065  | 49.358 | -0.495 | 0.891  |
| MAP7      | 0.221  | 1.098  | 0.262  | 0.986  | 0.027  | 56.823 | -0.759 | 0.061  | 0.587  | 0.307  |
| MAPK1IP1L | -0.238 | 44.812 | -0.186 | 1.772  | -0.321 | 0.281  | -0.859 | 0.061  | -0.647 | 0.021  |
| MAPK6     | -0.132 | 25.771 | -0.091 | 8.881  | 0.339  | 6.932  | -0.204 | 0.855  | -0.363 | 0.891  |
| MAPK7     | 0.111  | 15.278 | -0.443 | 0.784  | -0.040 | 58.074 | 0.027  | 54.831 | 0.441  | 0.891  |
| MAPK8     | -0.349 | 0.126  | -0.449 | 2.123  | -0.239 | 36.892 | -0.371 | 47.420 | -0.514 | 0.045  |
| MAPKAPK2  | -0.347 | 25.771 | 0.273  | 0.484  | 0.159  | 33.124 | -0.364 | 19.971 | 1.044  | 0.021  |
| MARCH6    | -0.148 | 49.540 | 0.618  | 0.107  | -0.389 | 0.517  | 0.413  | 27.828 | 1.275  | 0.021  |
| MARK1     | 0.074  | 44.812 | 0.098  | 11.783 | 0.090  | 49.127 | 0.096  | 41.825 | -0.608 | 0.084  |
| MAS1      | 0.255  | 0.170  | 0.196  | 7.537  | 0.153  | 36.892 | -0.186 | 0.727  | -0.481 | 0.993  |
| MASP2     | -0.600 | 0.052  | -0.478 | 0.514  | -0.245 | 55.771 | 0.389  | 3.866  | 0.158  | 24.398 |
| MAST4     | 0.101  | 37.036 | 0.399  | 0.354  | 0.164  | 4.053  | -0.091 | 8.987  | -0.117 | 24.398 |
| MAVS      | -0.049 | 52.218 | -0.274 | 3.205  | 0.107  | 20.025 | 0.016  | 54.831 | 0.406  | 0.418  |
| MAZ       | 0.169  | 44.812 | -0.542 | 2.859  | 0.189  | 0.856  | -0.122 | 41.825 | 0.264  | 0.993  |
| MB        |        |        | -0.556 | 0.484  |        |        | -0.232 | 41.825 | -0.356 | 0.021  |
| MB21D2    | 0.298  | 21.797 | -0.454 | 0.514  | 0.118  | 49.127 | 0.158  | 41.825 | 0.671  | 0.119  |
| MBD1      | 0.288  | 0.171  | 0.400  | 0.180  | 0.520  | 8.121  | -0.721 | 0.506  | -0.172 | 36.831 |
| MBNL1     | 0.157  | 33.231 | 0.531  | 2.614  | -0.107 | 33.124 | -0.088 | 23.450 | -0.382 | 0.021  |
| MBOAT1    | 0.009  | 56.765 | 0.583  | 0.663  | -0.043 | 58.928 | -0.250 | 0.947  | 0.165  | 11.001 |
| MBP       | -0.121 | 15.278 | 0.341  | 0.784  | 0.249  | 14.770 | -0.132 | 54.403 | 0.603  | 0.021  |
| MCL1      | 0.355  | 0.126  | 0.563  | 1.457  | -0.027 | 58.406 | -0.077 | 32.497 | 0.245  | 1.977  |
| MCM2      | 0.170  | 3.157  | -0.507 | 2.859  | -0.067 | 55.771 | -0.149 | 49.358 | 0.495  | 0.021  |
| MCM6      | 0.072  | 37.036 | -0.462 | 1.289  |        |        | 0.471  | 0.506  | 0.182  | 8.002  |
| MCM8      | -0.041 | 52.218 | -0.599 | 2.859  | -0.052 | 58.611 | 0.203  | 13.893 | -0.397 | 0.993  |
| MCTP1     | -0.423 | 0.324  | 0.241  | 2.614  | -0.456 | 14.770 | 0.070  | 49.358 | -1.262 | 0.021  |
| MDGA2     | 0.186  | 44.812 | 0.571  | 1.289  | -0.064 | 41.103 | -0.440 | 0.947  | -1.158 | 0.021  |
| MDH1      | -0.261 | 0.324  | 0.500  | 2.300  | -0.164 | 17.386 | -1.185 | 0.061  | -0.406 | 0.021  |
| MDM4      | 0.144  | 54.154 | -0.471 | 0.893  | 0.324  | 22.899 | -0.287 | 19.971 | 0.202  | 31.624 |
| ME1       | 0.172  | 21.797 | 0.712  | 0.877  | 0.108  | 54.331 | 0.146  | 5.543  | -0.441 | 0.021  |
| MED13     | 0.648  | 0.171  | 0.396  | 1.772  | 0.116  | 33.124 | -0.772 | 0.061  | -0.622 | 0.119  |
| MED13L    | -0.239 | 0.666  | 0.536  | 2.614  | -0.205 | 41.103 | -0.141 | 50.493 | -0.127 | 31.624 |
| MED22     | 0.290  | 0.171  | 0.483  | 4.122  | 0.131  | 49.127 | 0.555  | 1.878  | 0.479  | 0.891  |
| MED7      | 0.274  | 0.324  | 0.137  | 5.829  | -0.206 | 6.932  | 0.514  | 0.121  | 1.092  | 0.021  |
| MEF2B     | -0.398 | 0.357  | -0.131 | 5.829  | 0.132  | 6.932  | 0.174  | 16.936 | -0.032 | 39.468 |
| MEF2C     | -0.339 | 15.278 | -0.527 | 0.944  | 0.091  | 55.771 |        |        | -0.055 | 38.751 |
| MEGF6     | 0.213  |        | 0.481  | 0.514  | 0.727  | 0.092  | 0.186  | 47.420 | 0.357  | 40.660 |
| MEGF9     | -0.306 | 0.780  | -0.454 | 2.859  | -0.485 | 1.819  | 0.117  | 13.893 | -0.299 | 2.886  |
| MELK      | -0.496 | 25.771 | 0.131  | 9.629  |        |        | 1.126  | 0.061  | 0.407  | 0.129  |
| MET       | -0.202 | 37.036 | 0.355  | 0.267  | 0.296  | 41.103 | -0.608 | 0.399  | 0.347  | 31.624 |
| METTL20   | 0.090  | 44.812 | 0.375  | 1.663  | 0.041  | 56.823 |        |        | -0.674 | 0.021  |
| METTL5    | 0.102  | 49.540 | 0.548  | 0.300  | -0.090 | 33.124 | 0.139  | 7.099  | -0.241 | 0.391  |
| MFAP3     | 0.148  | 5.928  | 0.479  | 2.773  | 0.283  | 12.575 | -0.506 | 0.061  | -0.696 | 0.039  |
| MFI2      | -0.226 | 0.780  | -0.298 | 0.484  | 0.035  | 55.771 | 0.339  | 27.828 | 0.718  | 0.021  |
| MFN1      | -0.073 | 51.013 | 0.889  | 0.420  | 0.057  | 49.127 | -0.499 | 2.415  | -0.179 | 24.398 |
| MFSD8     | 0.072  | 44.812 | 0.759  | 0.595  | 0.103  | 20.025 | 0.490  | 5.543  | -0.351 | 0.993  |
| MGAT4A    | 0.655  | 0.171  | 0.619  | 0.204  | 0.022  | 57.395 | 0.147  | 51.354 | -0.583 | 0.021  |
| MGEA5     | 0.247  | 21.797 | 0.601  | 0.264  | 0.234  | 1.098  | 0.476  | 0.061  | -0.123 | 14.822 |
| MGP       | -0.224 | 49.540 | 0.499  | 2.773  | 0.161  | 36.892 | -0.264 | 41.825 | 0.054  | 24.398 |
| MGST1     | 0.116  | 18.587 | 0.642  | 0.595  | -0.173 | 20.025 | 0.238  | 23.450 | 0.674  | 0.021  |
| MGST3     | 0.420  | 0.052  | -0.531 | 2.859  | -0.241 | 1.098  | -0.127 | 41.825 | -0.901 | 0.066  |
| MIA       | 0.153  | 25.771 | 0.354  | 0.986  | 0.171  | 1.098  | 0.265  | 47.420 | 1.050  | 0.021  |
| MIB1      | -0.779 | 0.052  | 0.820  | 0.300  | -0.438 | 5.705  | 0.515  | 19.971 | -1.077 | 0.021  |
| MICAL1    | -0.086 | 29.668 | -0.553 | 2.123  | 0.260  | 12.575 | 0.048  | 52.656 | 0.597  | 0.021  |
| MICALL1   | -0.059 | 49.540 | -0.611 | 0.614  | 0.209  | 1.556  | -0.154 | 41.825 | 0.601  | 0.993  |
| MICALL2   | -0.604 | 0.052  | 0.323  | 5.829  | 0.684  | 0.092  | 0.037  | 54.831 | 1.060  | 0.021  |
| MID1      | -0.118 | 5.928  | -0.621 | 0.893  | -0.178 | 8.121  | 0.043  | 52.656 | 0.251  | 0.886  |
| MIER1     | -0.312 | 0.093  | -0.156 | 11.093 | -0.413 | 0.092  | 1.176  | 0.399  | -0.099 | 24.398 |
| MITD1     | 0.517  | 15.278 | 0.578  | 0.180  | 0.117  | 4.733  | 0.234  | 47.420 | -1.278 | 0.021  |
| MITF      | -1.152 | 0.052  | 0.255  | 0.354  | -0.530 | 10.694 | -1.540 | 0.061  | 0.478  | 31.624 |
| MKL2      | 0.518  | 1.098  | -0.391 | 2.614  | 0.227  | 2.056  | 0.326  | 8.987  | -0.699 | 0.021  |
| MLC1      | -0.191 | 0.511  | -0.179 | 0.514  | 0.057  | 54.331 | 0.086  | 27.828 | 0.518  | 0.391  |
| MLLT4     | 0.312  | 29.668 | 0.710  | 1.086  | 0.132  | 41.103 | 0.194  | 19.971 | -0.579 | 0.021  |
| MLXIP     | 0.290  | 4.284  | 0.251  | 7.537  | 0.037  | 58.406 | -0.605 | 0.506  | -0.386 | 0.066  |
| MLXIPL    | -0.413 | 29.668 | -0.200 | 4.122  | 0.196  | 41.103 | 0.430  | 7.099  | 0.884  | 0.021  |
| MMD       | -0.096 | 54.701 | 0.491  | 0.180  | 0.045  | 56.823 | 0.218  | 0.353  | -0.206 | 11.001 |

|          |        |        |        |        |        |        |        |        |        |        |
|----------|--------|--------|--------|--------|--------|--------|--------|--------|--------|--------|
| MMP15    | 0.414  | 0.324  | 0.274  | 2.300  |        |        |        |        | -0.184 | 35.531 |
| MMP2     | 0.223  | 0.529  | 0.271  | 2.773  | 0.053  | 54.331 | -0.462 | 1.210  | 0.788  | 0.021  |
| MMP9     | -0.217 | 9.997  | 0.255  | 5.829  | -0.112 | 56.823 | 1.018  | 0.061  | -1.073 | 0.021  |
| MOBP     | -0.312 | 44.812 | -0.541 | 0.669  | -0.352 | 0.856  | -0.698 | 41.825 | 0.442  | 31.624 |
| MOGAT1   | -0.096 | 37.036 | -1.311 | 0.354  | 0.046  | 54.331 |        |        | -0.424 | 0.269  |
| MORC3    | 0.132  | 37.036 | 0.750  | 1.457  | 0.020  | 58.928 | -0.103 | 47.420 | -0.481 | 0.021  |
| MPDZ     |        |        | -0.574 | 2.773  | -0.109 | 12.575 | -0.877 | 2.913  | 1.183  | 0.021  |
| MPEG1    | -0.485 | 0.052  | -0.230 | 0.514  | -0.282 | 41.103 | 0.285  | 11.241 | 0.752  | 0.021  |
| MPHOSPH9 | -0.153 | 12.647 | 0.727  | 0.107  | -0.049 | 56.823 | -0.474 | 0.130  | -0.754 | 0.021  |
| MPP1     | -0.559 | 0.093  | 0.177  | 1.534  | -0.352 | 4.733  | -0.154 | 52.656 | -0.403 | 0.045  |
| MPP7     | -0.283 | 25.771 | -0.789 | 5.829  | -0.034 | 59.432 | -0.221 | 49.358 | -0.871 | 0.084  |
| MR1      | -0.584 | 4.284  | -0.273 | 1.086  | -0.343 | 17.386 | -0.111 | 41.825 | 0.826  | 0.021  |
| MRC2     | -0.216 | 49.540 | -0.115 | 5.829  |        |        | 0.320  | 16.936 | 0.705  | 0.021  |
| MRGPRF   | -0.124 | 29.668 | -0.533 | 2.300  | 0.212  | 4.053  | 0.079  | 50.493 | 0.992  | 0.021  |
| MRI1     | 0.183  | 1.431  | 0.099  | 0.784  | 0.025  | 60.505 | 0.409  | 0.061  | 0.235  | 0.649  |
| MRPL15   | 0.200  | 0.529  | 0.581  | 1.086  | -0.257 | 6.932  | 0.538  | 0.292  | -0.837 | 0.021  |
| MRPS2    | -0.162 | 7.743  | -0.474 | 2.773  | 0.017  | 58.611 | -0.196 | 5.543  | -0.471 | 0.084  |
| MSH3     | -0.471 | 0.511  | 0.624  | 0.595  | -0.187 | 20.025 | 0.694  | 16.936 | -0.760 | 0.021  |
| MSI2     | -0.293 | 1.936  | 0.366  | 1.457  | -0.429 | 0.092  | -0.513 | 19.971 | 0.338  | 0.649  |
| MSN      | -0.286 | 0.666  | 0.377  | 1.663  | 0.231  | 1.309  | 0.131  | 41.825 | 0.864  | 0.021  |
| MT1E     |        |        |        |        | 0.117  | 49.127 |        |        | 0.772  | 0.269  |
| MT1F     | 0.269  | 0.171  | 0.259  | 5.829  | 0.263  | 0.402  | -0.039 | 54.403 | 0.657  | 0.084  |
| MTA1     | 0.428  | 0.324  | 0.323  | 0.595  | 0.082  | 49.127 |        |        | 0.090  | 37.824 |
| MTA2     | 0.146  | 29.668 | -0.390 | 0.428  | -0.039 | 58.611 | -0.109 | 41.825 | 0.170  | 24.398 |
| MTDH     | -0.158 | 49.540 | 0.512  | 0.595  | -0.227 | 2.659  | 0.470  | 0.947  | -0.075 | 31.624 |
| MTHFSD   | 0.041  | 49.540 | -0.587 | 2.773  | 0.025  | 58.074 |        |        | -0.366 | 0.166  |
| MTM1     | -0.425 | 0.780  | -0.309 | 0.784  | 0.288  | 33.124 | -1.283 | 0.121  | -0.478 | 24.398 |
| MTMR10   | -0.374 | 0.398  | 0.305  | 1.457  | 0.156  | 36.892 | -0.531 | 16.936 | 0.332  | 35.531 |
| MTMR11   | 0.032  | 52.827 | 0.409  | 0.514  | -0.163 | 36.892 | 0.250  | 27.828 | 0.630  | 0.021  |
| MTMR12   | 0.042  | 49.540 | 0.210  | 5.829  | -0.064 | 55.771 | -0.276 | 0.573  | -0.623 | 0.021  |
| MTPN     | -0.145 | 29.668 | -0.603 | 0.514  | 0.211  | 4.053  | 0.137  | 47.420 | -0.388 | 0.119  |
| MTRR     | -0.342 | 3.157  | -0.459 | 2.300  | 0.042  | 58.074 | -0.687 | 13.893 | 0.836  | 0.119  |
| MTSS1    | -0.432 | 2.450  | 0.556  | 0.174  | -0.452 | 0.092  | -0.206 | 41.825 | -0.826 | 0.269  |
| MTSS1L   | -0.307 | 1.431  |        |        | 0.159  | 14.770 | -0.497 | 4.906  | 0.442  | 0.021  |
| MTUS1    | 0.514  | 1.431  | 0.477  | 0.445  | 0.050  | 49.127 | 0.295  | 3.866  | 0.589  | 0.119  |
| MUC1     | -0.041 | 51.013 | -0.465 | 0.009  | 0.016  | 59.432 | 0.058  | 41.825 | 0.021  | 44.052 |
| MUTYH    | 0.233  | 1.098  | -0.721 | 0.784  | 0.268  | 4.053  | 0.244  | 27.828 | 0.429  | 0.021  |
| MX1      | -0.383 | 0.529  | 0.143  | 11.093 | 0.181  | 54.331 | -0.077 | 47.420 | 1.012  | 0.021  |
| MXD3     | -0.236 | 2.450  | -0.167 | 4.122  | -0.369 | 0.517  | -0.615 | 0.506  | -0.492 | 0.891  |
| MXRA8    | -0.135 | 52.827 | 0.373  | 0.264  |        |        | 1.017  | 0.061  | 0.323  | 11.001 |
| MYB      | 0.060  | 44.812 | -0.420 | 0.534  | -0.310 | 49.127 | -0.518 | 0.332  | 0.159  | 24.398 |
| MYBPC3   | 0.278  | 0.324  | 0.521  | 0.595  | 0.052  | 55.771 | -0.431 | 0.061  | -0.084 | 31.624 |
| MYCN     | -0.138 | 51.013 | 0.880  | 1.534  | 0.208  | 9.255  |        |        | -0.475 | 0.021  |
| MYF6     | -0.084 | 37.036 | -0.213 | 5.829  | 0.059  | 41.103 | 0.451  | 0.915  | 0.008  | 44.315 |
| MYH2     | -0.404 | 0.052  | -0.163 | 4.122  | 0.343  | 49.127 | 0.037  | 49.358 | 0.067  | 37.824 |
| MYH3     | 0.351  | 0.052  | 0.806  | 0.264  | 0.294  | 0.724  | -0.083 | 54.403 | -0.276 | 33.879 |
| MYH6     | 0.407  | 0.052  | 0.394  | 2.773  | 0.602  | 0.092  | 0.122  | 32.497 | 0.083  | 44.203 |
| MYL12B   | 0.042  | 52.218 | 0.395  | 0.514  | -0.036 | 58.611 | 0.032  | 51.354 | 0.441  | 0.307  |
| MYL6B    | -0.422 | 0.126  | -0.313 | 5.829  | -0.076 | 54.331 | -0.168 | 41.825 | -0.243 | 11.001 |
| Myl9     |        |        | 0.258  | 2.300  | 0.271  | 4.733  | 0.143  | 2.415  | 0.582  | 0.021  |
| MYO1B    | -0.318 | 0.930  | 0.876  | 0.986  | -0.371 | 0.440  | -0.456 | 0.399  | -1.217 | 0.021  |
| MYO1F    |        |        | -0.155 | 0.784  | 0.583  | 0.440  |        |        | 1.046  | 0.021  |
| MYO3B    | 0.422  | 0.170  | -0.266 | 5.829  | -0.092 | 54.331 | -0.565 | 11.241 | -0.051 | 37.824 |
| MYO5A    | 0.129  | 29.668 | 0.473  | 1.663  | 0.245  | 0.724  | 0.191  | 11.241 | -0.723 | 0.021  |
| MYO6     | 0.230  | 4.284  | 0.211  | 0.944  | -0.222 | 6.932  | 0.481  | 0.399  | 0.279  | 0.471  |
| MYO9A    | 0.329  | 4.284  | 0.499  | 0.893  | 0.036  | 54.331 | 0.146  | 47.420 | -0.290 | 6.001  |
| MYOD1    | -0.202 | 0.666  | -0.498 | 0.784  | -0.114 | 41.103 | -0.089 | 51.354 | 0.007  | 44.315 |
| MYOM1    | -0.635 | 0.052  | 0.169  | 0.514  | 0.441  | 0.641  | 1.133  | 0.250  | -0.302 | 6.001  |
| MYOM2    | 0.287  |        | 0.396  | 0.669  | -0.325 | 29.328 | 0.621  | 0.987  | -0.057 | 58.421 |
| MYSM1    | -0.834 | 0.052  | 0.404  | 0.944  | -0.206 | 14.770 | 0.832  | 0.292  | -0.905 | 0.021  |
| NAA30    | 0.528  | 0.052  | 0.744  | 0.569  | 0.235  | 0.240  | 0.032  | 55.172 | -0.215 | 0.891  |
| NAB2     | 0.329  | 0.398  | -0.342 | 7.537  | 0.091  | 54.331 | -0.062 | 52.124 | 0.520  | 0.119  |
| NANS     | -0.393 | 25.771 | -0.666 | 3.205  | 0.128  | 14.770 | 0.483  | 0.061  | 0.153  | 38.751 |
| NAP1L3   | -0.086 | 33.231 | 0.436  | 5.829  | -0.058 | 55.771 | -0.225 | 0.947  | -0.524 | 0.021  |
| NAPA     | -0.058 | 51.013 | -0.417 | 0.204  | 0.073  | 49.127 | 0.425  | 7.099  | 0.607  | 0.021  |
| NAPG     | 0.168  | 18.587 | 0.477  | 1.029  | 0.172  | 12.575 |        |        | -0.734 | 0.045  |
| NAPRT1   | -0.110 | 44.812 | -0.329 | 2.859  | 0.110  | 17.386 | -0.091 | 49.358 | 0.577  | 0.213  |
| NAT      | 0.409  | 1.431  | -0.254 | 2.123  | -0.392 | 29.328 | -1.011 | 0.061  | -1.094 | 0.021  |

|         |        |        |        |        |        |        |        |        |        |        |
|---------|--------|--------|--------|--------|--------|--------|--------|--------|--------|--------|
| Nav2    | -0.061 | 51.013 | 0.563  | 1.289  | 0.161  | 41.103 | -0.153 | 27.828 | -0.434 | 0.993  |
| NAV3    | -0.268 | 0.398  | -0.373 | 0.514  | -0.531 | 0.092  | -1.094 | 0.727  | -0.466 | 0.084  |
| NBEAL1  | -0.103 | 51.013 | -0.804 | 0.354  | -0.347 | 6.932  | 0.134  | 8.987  | 0.275  | 31.624 |
| NCALD   | -0.273 | 15.278 | -0.491 | 3.009  | -0.358 | 10.694 | -0.094 | 54.403 | -0.622 | 0.993  |
| NCAM1   | -0.199 | 5.928  | 0.770  | 1.086  | -0.232 | 12.575 | -0.432 | 0.353  | -0.390 | 0.045  |
| NCAPH2  | 0.204  | 5.928  | 0.409  | 0.669  | -0.044 | 54.331 | 0.198  | 0.506  | -0.501 | 0.993  |
| NCF2    | -0.191 | 5.928  | 0.391  | 0.877  | 0.082  | 49.127 | 0.231  | 0.855  | 1.228  | 0.021  |
| NCF4    | 0.194  | 25.771 | -0.118 | 5.829  | 0.149  | 6.932  | 0.155  | 1.617  | 1.235  | 0.021  |
| NCK1    | -0.238 | 37.036 | 0.507  | 0.514  | 0.054  | 58.406 | 0.089  | 32.497 | -1.172 | 0.021  |
| NCKAP1L | -0.216 | 44.812 | -0.236 | 2.773  | 0.078  | 54.331 | -0.150 | 41.825 | 0.911  | 0.021  |
| Ncl     | -0.183 | 1.936  | 0.587  | 1.457  | -0.057 | 57.395 | 0.237  | 5.543  | 0.435  | 0.021  |
| NCOA3   | 0.119  | 37.036 | -0.455 | 3.009  | 0.212  | 41.103 | 0.476  | 0.061  | 0.060  | 39.468 |
| NCOR1   | -0.149 | 4.284  | 0.729  | 1.534  | -0.261 | 2.659  | 0.236  | 19.971 | -0.653 | 0.021  |
| NDOR1   | 0.288  | 0.529  | 0.451  | 0.514  | 0.050  | 57.395 | -0.221 | 16.936 | -0.669 | 0.021  |
| NDRG2   |        |        | 0.558  | 0.180  |        |        | 0.063  | 47.420 | 0.141  | 38.751 |
| NDRG3   | 0.176  | 5.928  | 0.338  | 2.300  | -0.183 | 22.899 | -0.050 | 49.358 | -0.563 | 0.119  |
| NDST1   | 0.113  | 44.812 | 0.675  | 0.986  | -0.240 | 49.127 | 0.170  | 4.906  | -0.206 | 24.398 |
| NDST3   | -0.381 | 0.052  | -0.053 | 11.093 | -0.235 | 1.309  | 0.237  | 51.354 | -0.025 | 40.660 |
| NDUFAB1 | -0.029 | 57.109 | 0.480  | 2.300  | -0.109 | 36.892 | -0.482 | 1.332  | -0.400 | 0.993  |
| NDUFAF4 | 0.063  | 44.812 | 0.482  | 0.669  | 0.034  | 57.395 | 0.237  | 0.573  | 0.044  | 43.745 |
| NECAB2  | -0.433 | 0.052  | -0.080 | 10.404 | -0.356 | 29.328 | 0.302  | 0.506  | -0.278 | 31.624 |
| NEDD4L  | 0.373  | 0.052  | 0.627  | 0.669  | -0.152 | 36.892 | 0.205  | 7.099  | -1.209 | 0.021  |
| NEDD9   | 0.390  | 0.170  | 0.690  | 0.569  | 0.209  | 3.475  | 0.486  | 5.543  | 0.710  | 0.166  |
| NEFL    | 0.054  | 51.013 | 0.135  | 13.299 | -0.161 | 26.120 | -0.085 | 19.971 | -0.430 | 0.021  |
| NEFM    | 0.263  | 33.231 | 0.626  | 11.780 | -0.049 | 58.406 | -0.021 | 47.420 | -0.676 | 0.021  |
| NEK1    | -0.583 | 0.052  | 0.665  | 0.514  | -0.900 | 0.092  | 0.341  | 23.450 | -0.355 | 0.066  |
| NEK4    | -0.173 | 1.098  | -0.731 | 0.107  | -0.277 | 1.556  | 0.121  | 32.497 | -0.087 | 33.879 |
| NES     | -0.178 | 0.324  | -0.671 | 2.773  | 0.448  | 0.402  | -0.154 | 32.497 | 0.328  | 11.001 |
| NETO1   | -0.368 | 0.052  | -0.249 | 2.773  | -0.421 | 3.475  | -0.354 | 1.617  | -0.233 | 1.193  |
| NETO2   | 0.245  | 0.171  | 0.301  | 6.703  | 0.063  | 41.103 | 0.441  | 0.061  | 0.057  | 38.751 |
| NEU2    | -0.225 | 21.797 | -0.297 | 4.122  | 0.345  | 9.255  | -0.409 | 0.061  | -0.072 | 31.624 |
| NEUROD6 | 0.241  | 0.398  | 0.151  | 11.783 | -0.162 | 26.120 | 0.045  | 47.420 | -0.381 | 0.391  |
| NFASC   | 0.164  | 44.812 | -0.237 | 2.614  | 0.017  | 59.793 | -0.455 | 0.061  | 0.057  | 42.554 |
| NFATC2  | 0.154  | 37.036 | -0.279 | 3.205  | -0.487 | 49.127 | 0.111  | 23.450 | -0.578 | 0.021  |
| NFATC3  | -0.508 | 0.324  | 0.467  | 0.107  | -0.473 | 0.092  | -0.332 | 0.109  | -0.723 | 0.021  |
| NFE2L2  | -0.270 | 9.997  | 0.592  | 1.457  | 0.130  | 26.120 | 0.257  | 32.497 | 0.574  | 0.129  |
| NFIA    | -0.181 | 12.647 | 0.079  | 8.881  | -0.180 | 2.311  | 0.060  | 52.124 | 0.444  | 0.746  |
| NFIC    | 0.052  | 53.690 | -0.178 | 4.122  | 0.171  | 49.127 | 0.120  | 11.241 | 0.474  | 0.021  |
| NFIL3   | 0.195  | 37.036 | 0.390  | 1.086  | 0.517  | 0.641  | -0.177 | 27.828 | 0.486  | 0.021  |
| NFKB2   | 0.268  | 15.278 | 0.585  | 0.514  | 0.104  | 49.127 | -0.423 | 19.971 | -0.542 | 0.993  |
| NFS1    | 0.712  | 0.052  | 0.581  | 0.514  | 0.266  | 49.127 | 0.333  | 0.947  | -0.261 | 14.822 |
| NFU1    | 0.265  | 1.936  | 0.620  | 0.784  | -0.061 | 55.771 | -0.127 | 16.936 | -0.275 | 1.977  |
| NHLH1   | 0.095  | 52.218 | 0.309  | 0.514  | 0.462  | 0.724  | 0.185  | 47.420 | 0.901  | 0.021  |
| NIPA1   | 0.102  | 44.812 | -0.437 | 2.859  | -0.147 | 9.255  | -0.175 | 16.936 | -0.754 | 0.021  |
| NKAIN2  | -0.397 | 3.157  | 0.222  | 4.122  | 0.459  | 0.092  | -0.716 | 5.543  | -0.260 | 2.886  |
| NKX6-2  | 0.017  | 54.154 | 0.188  | 6.703  | -0.230 | 0.281  |        |        | 0.539  | 0.993  |
| NLRP10  | 0.057  | 44.812 | 0.298  | 5.829  | 0.326  | 2.659  | -0.828 | 0.061  | -0.281 | 14.822 |
| NME7    | 0.035  | 51.013 | 0.600  | 1.457  | -0.072 | 54.331 | 0.296  | 8.987  | -0.436 | 0.021  |
| NMI     | 0.199  | 33.231 | 0.306  | 5.829  | 0.360  | 14.770 | -0.133 | 53.829 | -0.683 | 0.021  |
| NNAT    | -0.281 | 4.284  | 0.161  | 8.881  | 0.071  | 55.771 | 0.043  | 51.354 | 0.400  | 0.021  |
| NOL6    | -0.230 | 9.997  | 0.409  | 5.829  | -0.218 | 3.475  | -0.488 | 41.825 | -0.532 | 0.021  |
| NOP56   | -0.201 | 4.284  | 0.303  | 5.829  | -0.162 | 14.770 | 0.148  | 32.497 | 0.356  | 0.021  |
| NOTCH3  | 0.085  | 44.812 | -0.237 | 4.122  | 0.111  | 22.899 | 0.261  | 3.866  | 0.540  | 0.021  |
| NOTCH4  | 0.012  |        | 0.472  | 1.663  | 0.481  | 0.092  | 0.784  | 0.855  | 0.480  | 0.062  |
| NOV     | -0.265 | 1.098  | 0.999  | 0.569  | 0.549  | 0.092  | 0.176  | 2.415  | 0.263  | 41.258 |
| NOXO1   | 0.193  | 29.668 |        |        | -0.124 | 41.103 | -0.593 | 0.866  | 0.331  | 11.001 |
| NPAS1   | 0.084  | 49.540 | 0.498  | 0.230  | 0.359  | 0.693  | -0.025 | 52.656 | 0.307  | 11.001 |
| NPAS4   | 0.092  | 49.540 | 0.403  | 0.986  | 0.344  | 14.770 | 0.076  | 50.493 | -0.486 | 0.269  |
| NPB     | 0.246  | 9.997  | -0.647 | 0.514  | 0.240  | 0.440  | 0.186  | 2.913  | 0.835  | 0.066  |
| NPC2    | 0.147  | 1.431  | 0.360  | 0.514  |        |        | 0.160  | 47.420 | 0.454  | 0.045  |
| NPHP3   | -0.479 | 0.262  | 0.596  | 1.457  | 0.297  | 33.124 | 0.714  | 0.399  | 0.693  | 0.066  |
| NPPC    | 0.128  | 15.278 |        |        | -0.220 | 10.694 | -0.173 | 1.617  | -0.598 | 0.746  |
| NPR2    | 0.332  | 1.431  | -0.318 | 4.122  | 0.147  | 20.025 | -0.443 | 0.341  | 0.693  | 0.021  |
| NPRL3   | 0.136  | 18.587 | 0.192  | 0.514  | 0.048  | 54.331 | 0.298  | 0.109  | -0.444 | 0.471  |
| NPY2R   |        |        | 1.000  | 0.354  |        |        | -0.431 | 3.866  | -0.299 | 11.001 |
| NPY5R   | 0.098  | 44.812 | 0.685  | 2.614  | 0.090  | 36.892 | 0.258  | 13.893 | -0.547 | 0.993  |
| NR2C1   | -0.091 | 52.218 | 0.496  | 2.300  | 0.481  | 0.402  | -0.824 | 0.121  | 0.200  | 8.002  |
| NR2E1   | 0.023  | 55.170 | 0.628  | 0.602  | -0.050 | 59.793 | 0.081  | 52.656 | 0.512  | 0.021  |

|          |        |        |        |        |        |        |        |        |        |        |
|----------|--------|--------|--------|--------|--------|--------|--------|--------|--------|--------|
| NR2F2    | -0.360 | 0.052  | -0.338 | 3.009  | 0.090  | 41.103 | 0.114  | 32.497 | 0.333  | 14.822 |
| NR4A1    | 0.587  | 0.171  | 0.420  | 3.205  | 0.051  | 55.771 | -0.249 | 7.099  | 0.124  | 44.052 |
| NR4A2    | -0.061 | 55.559 | -0.386 | 5.829  | -0.071 | 57.395 | -0.100 | 23.450 | -0.460 | 0.391  |
| NRARP    | 0.039  | 49.540 | -0.437 | 0.445  | -0.226 | 2.659  | 0.763  | 0.292  | -0.644 | 0.891  |
| NRAS     | 0.116  | 37.036 | 0.268  | 0.514  | 0.121  | 8.121  | -0.365 | 0.130  | -0.302 | 0.213  |
| NRCAM    | -0.732 | 0.171  | 0.845  | 0.595  | -0.099 | 29.328 | 0.044  | 47.420 | 1.065  | 0.084  |
| NRG1     | -0.459 | 0.052  | -0.250 | 3.205  | 0.582  | 0.517  | 0.104  | 41.825 | 0.346  | 8.002  |
| NRIP1    | -0.182 | 37.036 | -0.543 | 0.784  | -0.355 | 0.402  | -0.291 | 23.450 | 0.642  | 24.398 |
| NRP1     | -0.482 | 0.171  | 0.499  | 2.300  | -0.480 | 0.092  | 0.501  | 0.250  | -0.502 | 0.021  |
| NRXN1    | -0.311 | 0.052  | -0.504 | 0.107  | 0.596  | 2.659  | 0.272  | 41.825 | -0.421 | 0.746  |
| NRXN3    | 0.706  | 0.052  | 0.638  | 0.877  | -0.295 | 0.402  | -0.563 | 27.828 | -0.628 | 0.471  |
| NSBP1    | 0.195  | 49.540 | 0.637  | 1.457  | -0.080 | 41.103 | -0.124 | 50.493 | -0.473 | 0.021  |
| NSDHL    | 0.262  | 0.324  | 0.360  | 4.122  | -0.098 | 41.103 | 0.190  | 47.420 | -0.791 | 0.021  |
| NSUN6    | 0.117  | 7.743  | 0.550  | 0.514  | -0.057 | 54.331 | -0.179 | 49.358 | -0.437 | 0.119  |
| NT5C2    | -0.190 | 0.398  | -0.531 | 2.300  | 0.178  | 2.056  | -0.147 | 13.893 | -0.201 | 8.002  |
| NTF3     | -0.391 | 1.098  | -0.202 | 2.859  | -0.452 | 33.124 | 0.313  | 32.497 | -0.476 | 24.398 |
| NTM      | 0.205  | 0.262  | 0.453  | 0.180  | 0.256  | 2.056  | 0.110  | 41.825 | -0.088 | 33.879 |
| NTNG1    | -0.585 | 0.052  | -0.627 | 0.784  | -0.235 | 6.932  | 0.277  | 0.855  | -0.375 | 0.471  |
| NTRK2    | -0.092 | 44.812 | 0.425  | 4.122  | 0.182  | 8.121  | 0.078  | 47.420 | 0.609  | 0.021  |
| NTRK3    | 0.077  | 44.812 | 0.088  | 5.829  | 0.080  | 36.892 | 0.031  | 50.493 | -0.408 | 0.039  |
| NUAK1    | -0.550 | 0.052  | -0.119 | 6.703  | -0.652 | 2.659  | -0.274 | 0.061  | 0.009  | 44.052 |
| NUAK2    | -0.550 | 0.052  | -0.119 | 6.703  | -0.652 | 2.659  | -0.274 | 0.061  | 0.212  | 31.624 |
| NUCKS1   | -0.070 | 49.540 | 0.436  | 0.569  | -0.070 | 55.771 | -0.040 | 51.354 | -0.454 | 0.045  |
| NUDCD1   | 0.466  | 0.171  | 0.354  | 5.829  | 0.047  | 54.331 | 0.270  | 27.828 | -0.249 | 14.822 |
| NUFIP2   | -0.141 | 49.540 | -0.617 | 0.514  | -0.278 | 36.892 | -0.273 | 0.573  | -0.216 | 0.649  |
| NUMB     | 0.191  | 21.797 | 0.481  | 0.514  | 0.295  | 2.659  | -0.108 | 41.825 | -0.820 | 0.021  |
| NUP155   | -0.469 | 0.052  | -0.763 | 0.107  | -0.152 | 10.694 | -0.338 | 5.543  | -0.606 | 0.213  |
| NUP160   | 0.235  | 25.771 | 0.566  | 1.772  | -0.329 | 0.659  | 0.100  | 54.831 | -0.459 | 0.021  |
| NUP205   | -0.899 | 0.052  | -0.522 | 4.122  | 0.449  | 0.856  | 0.200  | 1.617  | 0.132  | 33.879 |
| NUPR1    | 0.184  | 49.540 | 0.636  | 0.300  | 0.406  | 3.068  | -0.270 | 41.825 | 0.777  | 0.021  |
| NVL      | -0.529 | 0.052  | 0.369  | 5.829  | -0.615 | 0.240  | -0.339 | 32.497 | 1.125  | 0.021  |
| NXN      | 0.131  | 37.036 | 0.178  | 1.663  | 0.326  | 0.440  | -0.538 | 0.130  | 0.458  | 0.471  |
| NXNL2    | 0.221  | 21.797 | 0.668  | 0.420  | 0.320  | 14.770 |        |        | 0.385  | 33.879 |
| OAS1     | 0.475  | 0.052  | 0.086  | 12.522 | 0.609  | 0.092  | 0.680  | 2.415  | 0.716  | 0.021  |
| Oas2     |        |        | -0.086 | 11.093 |        |        |        |        | 1.140  | 0.021  |
| OBFC2A   | -0.138 | 4.284  | 0.223  | 2.300  | -0.162 | 10.694 | 0.141  | 19.971 | -0.422 | 0.119  |
| OCRL     | -0.136 | 55.170 | 0.475  | 0.107  | -0.189 | 29.328 | 0.319  | 32.497 | -0.765 | 0.119  |
| ODF2L    | 0.156  | 9.997  | 0.754  | 0.784  | -0.044 | 60.231 | 0.176  | 47.420 | -0.221 | 24.398 |
| ODZ3     | 0.430  | 15.278 | -0.640 | 0.514  | -0.375 | 2.659  | -0.180 | 49.358 | 0.479  | 0.021  |
| OGG1     | 0.207  | 25.771 | -0.401 | 6.703  | -0.091 | 54.331 | 0.399  | 8.987  | 0.554  | 0.021  |
| OGN      | -0.411 | 29.668 | 0.320  | 9.629  | 0.765  | 0.092  | 0.649  | 2.415  | -0.406 | 24.398 |
| OLFML2B  | 0.072  | 44.812 | 0.196  | 12.522 | -0.162 | 56.823 | -0.084 | 49.358 | -0.523 | 0.391  |
| OLFML3   | 0.073  | 37.036 | -0.114 | 4.122  | 0.131  | 36.892 | 0.123  | 41.825 | 0.598  | 0.021  |
| OPLAH    | -0.558 | 0.052  | 0.230  | 8.881  | 0.200  | 9.255  | 0.605  | 1.617  | 0.426  | 31.624 |
| OPN4     |        |        | 0.086  | 5.829  |        |        |        |        | -0.474 | 0.891  |
| OPRM1    | 0.023  | 52.827 | -0.567 | 0.514  | -0.109 | 54.331 | -0.101 | 49.358 | -0.226 | 8.002  |
| ORC4     | 0.289  | 3.157  | 0.512  | 0.484  | 0.036  | 54.331 | 0.066  | 41.825 | -0.359 | 0.391  |
| OSBPL11  | 0.214  | 0.780  | 0.869  | 0.986  | 0.109  | 20.025 | -0.054 | 47.420 | -0.083 | 31.624 |
| OSBPL3   | 0.350  | 4.284  | 0.311  | 5.829  | 0.272  | 4.053  | -0.199 | 0.727  | -0.954 | 0.021  |
| OSMR     | 0.193  | 15.278 |        |        | 0.311  | 0.724  | 0.408  | 5.543  | 1.362  | 0.021  |
| OTOF     | -0.327 | 33.231 | 0.261  | 1.663  | 0.508  | 0.453  | 0.072  | 47.420 | 0.042  | 43.175 |
| OTOR     | -0.330 | 0.171  | 0.082  | 10.404 | 0.079  | 26.120 | -0.115 | 41.825 | -0.442 | 0.977  |
| OTOS     | -0.063 | 49.540 | -0.244 | 2.614  | -0.380 | 0.821  | -0.100 | 13.893 | 0.106  | 43.008 |
| OTUB1    | -0.286 | 51.013 | 0.223  | 8.881  | 0.066  | 49.127 | -0.429 | 0.061  | -0.450 | 0.119  |
| OXR1     | 0.187  | 33.231 | 0.471  | 0.107  | -0.145 | 14.770 | -0.255 | 11.241 | -0.401 | 0.119  |
| P2RX7    | 0.247  | 5.928  |        |        | 0.155  | 33.124 | 0.155  | 41.825 | 0.455  | 0.193  |
| P2RY1    | 0.128  | 25.771 | 0.277  | 5.829  | 0.443  | 2.056  | 0.559  | 5.543  | 0.461  | 0.391  |
| P2RY13   | -0.139 | 25.771 | 0.212  | 9.629  | 0.064  | 33.124 | 0.442  | 2.415  | 0.662  | 0.021  |
| P2RY2    | -0.613 | 0.052  | -0.710 | 0.484  | -0.295 | 10.694 | -0.473 | 0.353  | 0.104  | 42.212 |
| P2RY6    | 0.307  | 0.052  | 0.248  | 0.784  | -0.530 | 0.440  | -0.168 | 53.829 | 0.406  | 0.993  |
| PACSLIN3 | 0.662  | 0.170  | -0.769 | 1.772  | 0.163  | 10.694 | 0.036  | 54.831 | 0.448  | 0.391  |
| PADI2    | -0.245 | 4.284  |        |        | 0.172  | 3.068  | 0.196  | 0.855  | 0.839  | 0.021  |
| PADI4    | -0.406 | 3.157  | -0.190 | 4.122  | -0.171 | 56.823 | -0.437 | 27.828 | 0.583  | 0.418  |
| PAG1     | 0.027  | 56.874 | -1.437 | 0.107  | -0.289 | 1.098  | -0.609 | 19.971 | -0.519 | 24.398 |
| PAK2     | 0.054  | 49.540 | 0.233  | 5.829  | -0.069 | 41.103 | -0.472 | 0.061  | -0.429 | 0.021  |
| PAK3     | 0.100  | 37.036 | -0.710 | 0.204  | -0.320 | 0.281  | -0.134 | 47.420 | -0.222 | 0.649  |
| PAK4     | 0.052  | 44.812 |        |        | 0.095  | 36.892 | -0.124 | 49.358 | 0.536  | 0.021  |
| PAM      | -0.305 | 0.170  | -0.545 | 0.669  | -0.239 | 12.575 | -0.079 | 52.124 | -0.476 | 0.066  |



|         |        |        |        |       |        |        |        |        |        |        |
|---------|--------|--------|--------|-------|--------|--------|--------|--------|--------|--------|
| PANK1   | -0.068 | 49.540 | 0.402  | 2.300 | 0.230  | 2.311  | -0.261 | 2.415  | -0.622 | 0.391  |
| PANK2   | 0.066  | 44.812 | 0.539  | 0.944 | 0.026  | 56.823 | 0.070  | 47.420 | -0.387 | 0.021  |
| PANK3   | -0.139 | 51.013 | 0.700  | 3.205 | -0.134 | 33.124 | -0.158 | 41.825 | -0.727 | 0.021  |
| PAOX    | 0.049  | 44.812 | -0.492 | 0.784 | -0.106 | 36.892 | 0.244  | 8.987  | 0.485  | 0.269  |
| PARD3   | -0.096 | 44.812 | 0.570  | 0.602 | 0.229  | 0.856  | -0.635 | 4.906  | -0.166 | 24.398 |
| PARD6G  | 0.275  | 15.278 | 0.558  | 1.457 | 0.236  | 1.819  | 0.032  | 52.656 | -0.439 | 0.084  |
| PARP14  | 0.236  | 18.587 | 0.228  | 8.253 |        |        | 0.436  | 5.543  | 1.411  | 0.021  |
| PARP3   | 0.049  | 49.540 | 0.207  | 4.122 | 0.577  | 0.092  | 0.084  | 51.354 | 0.284  | 33.879 |
| PARP9   | -0.381 | 37.036 |        |       | -0.142 | 5.705  | 0.334  | 32.497 | 0.492  | 0.021  |
| PARVG   | 0.239  | 0.171  | -0.162 | 4.122 | 0.357  | 10.694 | -0.159 | 47.420 | 0.557  | 0.891  |
| PAX6    | -0.431 | 25.771 | 0.331  | 1.457 | 0.665  | 3.475  | 0.470  | 1.210  | 0.993  | 0.045  |
| PBX1    | -0.477 | 0.171  | 0.818  | 0.595 | -0.411 | 2.659  | -0.734 | 0.061  | -0.463 | 0.649  |
| PBX3    | -0.130 | 49.540 | 0.383  | 1.086 | 0.312  | 4.053  | 0.171  | 3.866  | -0.663 | 0.993  |
| PBXIP1  | -0.157 | 44.812 | -0.345 | 0.784 | 0.159  | 29.328 | -0.117 | 7.099  | 0.527  | 0.084  |
| PCBP1   | 0.040  | 52.218 | -0.581 | 2.773 | 0.057  | 56.823 | -0.082 | 32.497 | 0.529  | 0.471  |
| PCBP2   | 0.196  | 1.098  | 0.403  | 0.514 | 0.050  | 54.331 | 0.217  | 19.971 | 0.433  | 0.021  |
| PCDH1   | -0.061 | 51.013 | -0.405 | 0.986 |        |        | -0.053 | 50.493 | 0.007  | 44.315 |
| PCDH17  | -0.768 | 0.666  | 0.301  | 1.663 | -0.750 | 0.092  | -0.605 | 1.210  | 0.198  | 40.660 |
| PCDH9   | -0.608 | 0.052  | 0.545  | 5.829 | -1.195 | 0.724  | 0.128  | 47.420 | 0.497  | 24.398 |
| Pcdhb12 | 0.029  | 57.109 | -0.866 | 2.859 | -0.089 | 54.331 | 0.542  | 0.061  | 0.165  | 11.001 |
| PCGF5   | 0.077  | 49.540 | 0.669  | 0.514 | 0.132  | 49.127 | 0.086  | 16.936 | 0.496  | 0.119  |
| PCM1    | -0.547 | 0.170  | 0.495  | 3.205 | -0.466 | 0.402  | -0.218 | 0.399  | 0.497  | 0.021  |
| PCP4    | -1.036 | 0.052  | -0.212 | 0.514 | -0.663 | 5.705  | 0.467  | 0.250  | -0.318 | 33.879 |
| PCSK1   | 0.730  | 52.218 | 0.907  | 2.614 | 0.178  | 3.475  | 0.696  | 32.497 | 0.771  | 0.977  |
| PCYT1B  | 0.411  | 29.668 | -0.460 | 4.122 | -0.135 | 36.892 | 0.185  | 27.828 | -0.509 | 0.045  |
| PDCD1   |        |        |        |       |        |        |        |        | 1.200  | 0.021  |
| PDCD11  | 0.467  | 0.052  | 0.460  | 2.773 | 0.569  | 0.092  | 0.629  | 32.497 | 0.529  | 1.193  |
| PDE10A  | -0.282 | 15.278 | -0.560 | 1.086 | 0.229  | 41.103 | -0.366 | 0.727  | 0.488  | 24.398 |
| PDE12   | 0.396  | 0.170  | 0.589  | 0.514 |        |        | -0.134 | 47.420 | 0.073  | 43.867 |
| PDE1A   | -0.124 | 37.036 | 0.462  | 4.122 | -0.145 | 33.124 | -0.110 | 13.893 | -0.434 | 0.021  |
| PDE2A   | -0.089 | 49.540 | -0.428 | 0.595 | -0.231 | 0.517  | -0.078 | 49.358 | -0.067 | 36.831 |
| PDE4A   | 0.090  | 49.540 | 0.354  | 0.514 | -0.217 | 0.659  | 0.136  | 51.354 | -0.502 | 0.119  |
| PDE4DIP | -0.865 | 0.511  | 0.767  | 0.877 | -0.203 | 20.025 | -0.491 | 47.420 | 0.246  | 0.391  |
| PDE6G   | -0.080 | 21.797 | -0.581 | 2.773 |        |        | -0.061 | 41.825 | 0.472  | 0.891  |
| PDE6H   | 0.081  | 55.559 | -0.357 | 4.122 | -0.687 | 0.092  | -0.389 | 2.415  | -0.061 | 31.624 |
| PDEFD   |        |        | -0.476 | 0.784 |        |        |        |        | 0.691  | 0.021  |
| PDGFC   | -0.702 | 0.052  | 0.698  | 1.029 | 0.314  | 4.053  | 0.710  | 0.250  | -0.873 | 0.993  |
| PDGFRA  | 0.087  | 44.812 | 0.635  | 0.595 | 0.092  | 36.892 | -0.075 | 52.656 | 0.263  | 33.879 |
| PDHA1   | 0.028  | 55.170 | 0.444  | 0.514 | -0.258 | 0.641  | -0.062 | 47.420 | -0.518 | 0.021  |
| PDIA5   | 0.149  | 2.450  | 0.397  | 0.180 | 0.049  | 54.331 | -0.089 | 47.420 | -0.234 | 31.624 |
| PDlim1  | -0.248 | 0.171  | 0.203  | 1.772 | 0.247  | 20.025 | 0.117  | 47.420 | 0.420  | 0.021  |
| PDLIM2  | 0.156  | 0.930  | 0.291  | 0.986 | -0.063 | 54.331 | -0.079 | 52.656 | 0.621  | 0.891  |
| PDLIM4  | -0.108 | 25.771 | -0.383 | 3.205 | 0.193  | 41.103 | 0.404  | 0.130  | 1.217  | 0.021  |
| PDP1    | 0.137  | 37.036 | 0.360  | 2.300 | 0.279  | 0.281  | 0.289  | 5.543  | -0.540 | 0.649  |
| PDSS1   | 0.251  | 7.743  | 0.356  | 7.537 |        |        | 0.342  | 1.210  | -0.856 | 0.021  |
| PDXX    | -0.426 | 3.157  | -0.951 | 0.107 | -0.677 | 0.092  | 0.293  | 41.825 | 0.450  | 0.066  |
| PDYN    | -0.181 | 44.812 | -0.223 | 7.537 | 0.367  | 5.705  | 0.107  | 41.825 | 0.503  | 0.021  |
| PDZD2   | -0.953 | 0.052  | 0.344  | 1.772 | 0.898  | 0.092  | -0.639 | 5.543  | -0.217 | 6.001  |
| PDZD3   | 0.175  | 1.431  | 0.232  | 2.123 | 0.209  | 41.103 | -0.311 | 19.971 | -0.922 | 0.021  |
| PEBP1   | 0.995  | 0.052  | 0.181  | 8.253 | -0.055 | 54.331 | -0.429 | 41.825 | 0.232  | 37.824 |
| PEL1    | 0.367  | 0.529  | -0.366 | 2.773 | -0.468 | 0.402  | -1.048 | 0.061  | -0.442 | 0.119  |
| PEL12   | 0.434  | 0.052  | 0.853  | 0.569 | -0.311 | 9.255  | 0.314  | 19.971 | 0.699  | 0.021  |
| PELP1   | 0.094  | 49.540 | 0.490  | 0.107 | 0.798  | 0.092  | -0.873 | 0.727  | 0.201  | 1.193  |
| PEMT    | 0.271  | 44.812 |        |       | 0.214  | 14.770 | -0.927 | 0.061  | 0.547  | 0.021  |
| PENK    | -0.402 | 0.262  | 0.608  | 0.180 | 0.549  | 0.517  | -0.197 | 51.354 | 0.674  | 0.649  |
| PER1    | 0.326  | 0.324  | 0.188  | 7.537 | 0.173  | 1.309  | -0.418 | 0.061  | -0.266 | 11.001 |
| PER2    | 0.185  | 3.157  | 0.812  | 0.569 | 0.010  | 60.505 | -0.098 | 11.241 | -0.223 | 31.624 |
| PERP    | -0.142 | 5.928  | 0.468  | 1.086 | -0.056 | 56.823 | 0.534  | 0.130  | 0.249  | 11.001 |
| PES1    | -0.173 | 25.771 |        |       | -0.104 | 58.074 | 0.469  | 32.497 | 1.060  | 0.021  |
| PEX1    | -0.795 | 0.171  | 0.830  | 0.877 | 0.149  | 49.127 | 0.653  | 0.061  | -0.606 | 14.822 |
| PEX13   | 0.307  | 12.647 | 0.670  | 0.595 | 0.141  | 33.124 | -0.105 | 52.656 | -0.563 | 0.084  |
| PEX14   | 0.214  | 21.797 | -0.512 | 2.859 | 0.088  | 49.127 | 0.061  | 47.420 | 0.627  | 0.269  |
| PEX5L   | 0.050  | 49.540 | -0.412 | 0.944 | 0.073  | 49.127 | 0.077  | 32.497 | 0.138  | 38.751 |
| PFDN2   | -0.075 | 53.690 | 0.544  | 0.264 | 0.051  | 54.331 | 0.075  | 47.420 | 0.081  | 36.831 |
| PFKFB3  | 0.016  | 56.874 | -0.475 | 0.784 | 0.313  | 0.092  | 0.032  | 50.493 | 0.260  | 0.269  |
| PFKFB4  | -0.094 | 44.812 | -0.144 | 2.614 | 0.026  | 57.395 | -0.095 | 50.493 | 0.496  | 0.021  |
| PGCP    | -0.484 | 9.997  | 0.562  | 0.514 | -0.140 | 41.103 | 0.139  | 41.825 | 0.489  | 0.891  |
| PGD     | 0.106  | 44.812 | 0.320  | 0.595 | -0.067 | 49.127 | 0.460  | 0.061  | -0.206 | 24.398 |

|         |        |        |        |        |        |        |        |        |        |        |
|---------|--------|--------|--------|--------|--------|--------|--------|--------|--------|--------|
| PGDS    |        |        |        |        |        |        |        | 0.785  | 0.045  |        |
| PGM2L1  | -0.198 | 1.431  | 0.435  | 5.829  | 0.443  | 0.092  | -0.688 | 19.971 | -1.277 | 0.021  |
| PGM3    | 0.068  | 37.036 | -0.182 | 0.514  | 0.046  | 49.127 | -0.426 | 0.061  | 0.451  | 0.213  |
| PGM5    | 0.032  | 51.013 | -0.266 | 3.205  | 0.325  | 1.819  | 0.250  | 19.971 | 0.541  | 0.066  |
| PGM5    | -0.324 | 1.936  | -0.266 | 3.205  | 0.325  | 1.819  | 0.250  | 19.971 | 0.541  | 0.066  |
| PGRMC2  | 0.271  | 0.171  | 0.502  | 0.107  | 0.048  | 54.331 | 0.183  | 7.099  | -0.196 | 1.193  |
| PHACTR1 | 0.180  | 37.036 | 0.401  | 0.204  | -0.212 | 49.127 | 0.754  | 0.061  | -0.509 | 0.993  |
| PHC3    | -0.132 | 33.231 | 0.359  | 5.829  | 0.045  | 49.127 | -0.077 | 52.124 | -0.464 | 0.021  |
| PHF14   | 0.333  | 15.278 | 0.578  | 0.784  | 0.069  | 41.103 | 0.058  | 53.272 | -0.417 | 0.084  |
| PHF20L1 | 0.280  | 25.771 | 0.541  | 0.514  | -0.145 | 54.331 | -0.123 | 32.497 | -0.632 | 0.021  |
| PHF21A  | -0.050 | 56.765 | 0.533  | 5.829  | -0.188 | 54.331 | -0.109 | 52.656 | -0.409 | 0.045  |
| PHKA1   | 0.178  | 33.231 | 0.081  | 10.404 |        |        | 0.919  | 0.573  | 0.509  | 0.993  |
| PHKA2   | -0.207 | 0.666  | -0.549 | 0.300  | -0.129 | 49.127 | -0.394 | 41.825 | 0.619  | 0.471  |
| PHTF2   | 0.013  | 56.765 | -0.212 | 4.122  | 0.062  | 54.331 | 0.117  | 32.497 | 0.642  | 0.471  |
| PHYHD1  |        |        | -0.243 | 2.300  | 0.032  | 58.406 | 0.125  | 47.420 | 0.835  | 0.021  |
| PIAS1   | 0.159  | 18.587 | 0.542  | 1.289  | 0.115  | 54.331 | -0.317 | 0.855  | -0.437 | 0.307  |
| PIGG    | -0.309 | 0.262  | -0.648 | 0.784  | 0.194  | 14.770 | -0.276 | 47.420 | 0.459  | 0.269  |
| PIGh    | -0.178 | 1.936  | 0.259  | 8.881  | -0.272 | 20.025 | -0.256 | 1.210  | -0.799 | 0.021  |
| PIK3C2G | -0.147 | 9.997  | -0.673 | 2.773  | 0.378  | 14.770 | -0.438 | 23.450 | -0.399 | 0.213  |
| PIK3CD  | 0.053  | 44.812 | -0.618 | 3.009  | 0.125  | 9.255  | 0.155  | 41.825 | 0.451  | 0.021  |
| PIK3IP1 | 0.137  | 49.540 | 0.416  | 0.514  | 0.224  | 9.255  | 0.163  | 49.358 | 0.437  | 0.021  |
| PIK3R1  | -0.158 | 9.997  | 0.546  | 1.086  | 0.482  | 22.899 | -0.686 | 0.061  | 0.528  | 0.649  |
| PIKFYVE |        |        | 0.468  | 0.944  | 0.027  | 58.611 | 0.276  | 0.573  | -0.313 | 11.001 |
| PIN1    | 0.115  | 44.812 | 0.160  | 9.629  | 0.152  | 4.053  | -0.153 | 16.936 | -0.449 | 0.471  |
| PIP5K3  | 0.033  | 49.540 | -0.444 | 0.445  | -0.233 | 0.399  | 0.039  | 55.771 | 0.100  | 33.879 |
| PITPNC1 | -0.335 | 0.052  | 0.366  | 2.859  | -0.244 | 29.328 | -0.492 | 5.543  | -0.519 | 0.021  |
| PKD2L2  | 0.087  | 44.812 | -0.253 | 6.703  | -0.052 | 54.331 | 0.068  | 47.420 | 0.477  | 0.649  |
| PKIB    | -0.296 | 0.930  | 0.522  | 0.784  | -0.464 | 1.098  | 0.326  | 2.913  | -0.779 | 0.119  |
| PKM2    | -0.178 | 55.870 | 0.137  | 4.122  | -0.607 | 0.092  | -1.365 | 0.061  | 0.185  | 14.822 |
| PKN2    | -0.163 | 3.157  | 0.600  | 1.772  | -0.188 | 10.694 | -0.491 | 7.099  | 0.682  | 0.021  |
| PKP3    | 0.043  | 52.827 | -0.073 | 10.404 | 0.165  | 54.331 | 0.056  | 49.358 | 0.540  | 0.021  |
| PLA2G16 | -0.071 | 56.874 | -0.144 | 8.253  | 0.486  | 0.240  | 0.174  | 13.893 | 0.877  | 0.021  |
| PLA2G2F | 0.008  | 56.513 | -0.480 | 0.829  |        |        |        |        | -0.067 | 33.879 |
| PLA2G4C | 0.091  |        | -0.382 | 0.669  | 0.045  | 49.127 | 0.073  | 41.825 | 0.231  | 14.822 |
| PLA2G5  | -0.160 | 54.701 | 0.237  | 5.829  | 0.499  | 0.240  | -0.189 | 47.420 | 0.506  | 0.039  |
| PLAA    | 0.453  | 0.324  | 0.360  | 0.784  | 0.073  | 55.771 | -0.201 | 0.947  | -0.098 | 24.398 |
| PLAGL1  | -0.356 | 0.052  | -0.519 | 4.122  | 0.202  | 8.121  | 0.193  | 16.936 | 0.309  | 33.879 |
| PLAUR   |        |        | -0.096 | 9.629  | 0.326  | 1.309  | 0.392  | 0.109  | 0.647  | 0.021  |
| PLCB1   | 0.352  | 0.529  | 0.414  | 2.773  | -0.531 | 0.092  | -0.241 | 41.825 | -0.632 | 0.021  |
| PLCb2   | 0.139  | 1.936  | 0.171  | 9.629  | -0.313 | 20.025 | -0.090 | 41.825 | 0.989  | 0.021  |
| PLCE1   | 0.544  | 0.780  | -0.133 | 5.829  | 0.133  | 12.575 | 0.761  | 0.061  | 1.016  | 0.021  |
| PLCG1   | 0.084  | 53.690 | -0.418 | 0.859  | 0.611  | 2.659  | 0.139  | 13.893 | 0.093  | 33.879 |
| PLCG2   | 0.172  | 4.284  | -0.276 | 4.122  |        |        | 0.088  | 49.358 | 0.661  | 0.471  |
| PLCZ1   | -0.524 | 0.052  | 0.305  | 5.829  | 0.354  | 4.733  | 0.661  | 0.061  | 0.324  | 24.398 |
| PLD4    | 0.208  | 1.936  | -0.118 | 5.829  | 0.059  | 54.331 | 0.171  | 19.971 | 0.527  | 0.129  |
| PLEC    | -0.851 | 0.126  | 0.538  | 0.107  | 0.187  | 4.053  | -1.479 | 0.061  | -0.907 | 0.066  |
| PLEKHA3 | 0.006  | 57.109 | -0.061 | 11.093 | 0.156  | 29.328 | -0.188 | 0.353  | -0.367 | 0.084  |
| PLEKHA5 | -0.452 | 0.052  | 0.493  | 0.514  | 0.024  | 58.406 | -0.039 | 47.420 | -0.063 | 35.531 |
| PLEKHA6 | -0.398 | 0.930  | -0.366 | 0.784  | 0.473  | 1.309  | -0.166 | 52.124 | -0.142 | 4.218  |
| PLEKHG3 | -0.358 | 0.262  | 0.407  | 0.595  | -0.827 | 0.092  | 0.433  | 0.061  | 0.539  | 0.166  |
| PLIN1   | 0.094  | 44.812 | -0.122 | 6.703  | -0.368 | 33.124 | 0.112  | 27.828 | -0.481 | 0.977  |
| PLIN2   | -0.162 | 37.036 | 0.192  | 4.122  |        |        | 0.326  | 1.878  | 0.684  | 0.045  |
| PLK3    | 0.444  | 0.093  | 0.098  | 4.122  | 0.095  | 10.694 | -0.077 | 41.825 | 0.073  | 40.660 |
| PLOD1   | 0.057  | 52.827 | -0.254 | 2.859  | -0.173 | 54.331 | 0.131  | 47.420 | -0.513 | 0.166  |
| PLP1    | -0.170 | 1.936  | -0.168 | 4.122  | 0.123  | 12.575 | -0.190 | 41.825 | 0.605  | 0.021  |
| PLSCR1  | -0.893 | 0.170  | 0.120  | 11.783 | 0.051  | 59.432 | 0.238  | 8.987  | 0.600  | 0.021  |
| PLSCR2  | -0.941 | 0.052  | 0.278  | 6.703  | 0.271  | 0.240  |        |        | 1.096  | 0.021  |
| PLXDC1  | -0.068 | 55.870 | -0.167 | 2.859  | 0.125  | 49.127 | 0.246  | 1.617  | 0.570  | 0.166  |
| PLXDC2  | -0.071 | 54.154 | -0.590 | 3.205  | -0.156 | 3.475  | 0.024  | 55.172 | 0.657  | 0.021  |
| PLXNA2  | 0.106  | 51.013 | -0.087 | 8.253  | 0.031  | 56.823 | -0.135 | 32.497 | -0.432 | 0.061  |
| PLXNB1  | 0.086  | 49.540 | 0.399  | 0.935  | 0.206  | 1.309  | -0.233 | 0.855  | 0.172  | 31.624 |
| Pmaip1  | -0.382 | 3.157  | -0.410 | 4.122  | 0.152  | 33.124 | -0.580 | 27.828 | 0.578  | 0.119  |
| PMCH    |        |        | -0.378 | 7.537  | -0.227 | 8.121  | 0.177  | 47.420 | 0.677  | 0.021  |
| PMS2    | -0.259 | 44.812 | 0.263  | 2.123  | -0.199 | 54.331 | 0.549  | 0.727  | -0.227 | 11.001 |
| PNMT    | 0.045  | 44.812 | -0.125 | 6.703  | 0.032  | 55.771 | 0.454  | 0.573  | -0.089 | 31.624 |
| PNN     |        |        | 0.389  | 0.174  | -0.125 | 26.120 |        |        | -0.367 | 0.021  |
| PNOC    | 0.313  | 1.431  | -0.184 | 8.881  | 0.043  | 55.771 | -0.544 | 0.061  | 0.097  | 43.008 |
| PNPLA2  | 0.092  | 49.540 | -0.360 | 4.122  | -0.094 | 36.892 | 0.214  | 4.906  | 0.665  | 0.021  |

|                |        |        |        |        |        |        |        |        |        |        |
|----------------|--------|--------|--------|--------|--------|--------|--------|--------|--------|--------|
| POFUT1         | 0.171  | 3.157  | -0.264 | 4.122  | -0.234 | 0.659  | -0.846 | 0.061  | 0.146  | 42.836 |
| POLE           | -0.390 | 3.157  | 0.406  | 0.428  | -0.107 | 49.127 | 0.635  | 23.450 | 0.417  | 0.993  |
| POLG2          | 0.312  | 29.668 | 0.322  | 0.602  | -0.023 | 60.505 | 0.462  | 0.061  | 0.342  | 0.746  |
| POLH           | 0.042  | 54.701 | -0.647 | 0.514  | 0.404  | 3.475  | 0.205  | 13.893 | -0.184 | 2.886  |
| POLI           | 0.224  | 3.157  | -0.154 | 4.122  | -0.176 | 17.386 | 0.513  | 0.061  | 0.279  | 1.977  |
| POLK           | 0.015  | 56.874 | 0.461  | 4.122  | -0.145 | 17.386 | -0.443 | 0.061  | -0.395 | 0.649  |
| POLL           | 0.156  | 15.278 | -0.446 | 2.773  | 0.177  | 4.733  | -0.219 | 27.828 | -0.423 | 0.746  |
| POLM           | -0.142 | 3.157  | -0.588 | 0.784  | -0.265 | 0.402  | 0.133  | 27.828 | 0.131  | 14.822 |
| POLR1E         | 0.469  | 0.052  | 0.475  | 0.514  | 0.016  | 58.406 |        |        | -0.187 | 8.002  |
| POLR2A         | -0.085 | 25.771 | -0.406 | 0.893  | -0.402 | 5.705  | -0.042 | 52.656 | 0.064  | 40.660 |
| POLR2I         | -0.060 | 54.701 | -0.413 | 0.784  | 0.175  | 6.932  | 0.130  | 19.971 | 0.441  | 0.391  |
| POLR3A         | -1.005 | 0.398  | -0.825 | 0.300  | -0.255 | 2.311  | -0.246 | 0.130  | -0.350 | 14.822 |
| POLR3E         | -0.398 | 0.171  | 0.395  | 1.534  | 0.068  | 49.127 | 0.354  | 41.825 | -0.617 | 0.021  |
| POLR3F         | -0.437 | 0.511  | 0.558  | 0.514  | 0.261  | 12.575 | -0.472 | 0.177  | -0.273 | 11.001 |
| POLR3H         | 0.087  | 33.231 | 0.261  | 3.205  | 0.161  | 49.127 | 0.161  | 47.420 | -0.744 | 0.039  |
| POLR3K         | -0.159 | 44.812 | 0.573  | 1.086  | 0.254  | 8.121  | 0.427  | 41.825 | -1.136 | 0.021  |
| POLRMT         |        |        | -0.086 | 11.783 | 0.052  | 49.127 | 0.332  | 3.866  | 0.473  | 0.129  |
| POM121/POM121C | 0.150  | 1.431  | 0.344  | 2.123  | -0.216 | 49.127 | -0.947 | 0.109  | -0.793 | 0.021  |
| PON3           | 0.092  | 44.812 | -0.318 | 0.514  | 0.513  | 0.092  | 0.540  | 0.341  | 0.843  | 0.021  |
| POPDC2         | 0.246  | 1.936  | 0.171  | 6.703  | -0.251 | 3.475  | -0.250 | 0.121  | -0.543 | 0.021  |
| PPAPDC1A       | -0.307 | 3.157  | -0.392 | 0.300  | -0.295 | 1.556  | -0.087 | 53.272 | -0.109 | 31.624 |
| PPARG          | -0.136 | 1.431  | -0.398 | 0.805  | 0.108  | 29.328 | 0.099  | 32.497 | 0.329  | 11.001 |
| PPARGC1B       | -0.269 | 37.036 | 0.489  | 1.086  | -0.502 | 0.092  | 0.026  | 52.656 | 0.431  | 0.021  |
| PPFIBP2        | 0.141  | 25.771 | 0.764  | 0.669  | 0.592  | 0.092  | -0.457 | 32.497 | 0.350  | 0.166  |
| PPHLN1         | -0.284 | 44.812 | 0.601  | 1.212  | -0.096 | 49.127 | -0.061 | 47.420 | -0.650 | 0.021  |
| PPIC           | 0.011  | 56.513 | 0.872  | 2.300  | -0.125 | 33.124 | -0.122 | 47.420 | -0.360 | 0.021  |
| PPM1D          | 0.285  | 0.529  | 0.210  | 3.009  | -0.133 | 41.103 | -0.302 | 0.506  | -0.390 | 0.213  |
| PPM1H          | 0.065  | 44.812 | -0.368 | 0.267  | 0.335  | 4.733  | -0.260 | 4.906  | -0.908 | 0.021  |
| PPM1L          | -0.437 | 0.126  |        |        | -0.169 | 17.386 | -0.218 | 41.825 | -0.342 | 0.891  |
| PPP1R12B       | 0.124  | 44.812 | 0.563  | 0.595  | -0.103 | 55.771 | 0.124  | 41.825 | -0.175 | 33.879 |
| PPP1R14A       | 0.049  | 52.218 | 0.282  | 5.829  | 0.077  | 41.103 | -0.048 | 47.420 | 0.433  | 0.601  |
| PPP1R15        | 0.283  | 29.668 | 0.376  | 0.877  | 0.369  | 0.092  | 0.127  | 54.403 | -0.450 | 0.084  |
| PPP1R3C        | 0.107  | 7.743  | 0.440  | 0.514  | 0.105  | 54.331 | 0.024  | 53.272 | 0.517  | 0.391  |
| PPP2R1B        | 0.100  | 49.540 | -0.665 | 0.180  | -0.199 | 49.127 | -0.117 | 13.893 | 0.485  | 0.993  |
| PPP2R2B        | -0.244 | 1.431  | 0.200  | 5.829  | -0.144 | 20.025 | -0.321 | 19.971 | -0.555 | 0.021  |
| PPP2R3A        | 0.067  | 49.540 | -0.495 | 0.445  | -0.698 | 0.092  | -0.419 | 0.061  | -0.062 | 39.468 |
| PPP3R1         | -0.076 | 44.812 | 0.756  | 0.784  | -0.073 | 55.771 | -0.284 | 0.177  | 0.690  | 0.119  |
| PPP5C          | 0.292  | 9.997  | 0.548  | 4.122  | 0.205  | 20.025 | 0.140  | 47.420 | -0.550 | 0.129  |
| PPP6R1         | -0.446 | 0.126  | -0.151 | 5.829  | 0.022  | 55.771 | -0.318 | 47.420 | -0.409 | 0.084  |
| PPTC7          | -0.068 | 51.013 | 0.216  | 0.264  | -0.124 | 9.255  | 0.139  | 41.825 | 0.551  | 0.084  |
| PRCP           | 0.335  | 0.780  | -0.600 | 0.829  | -0.374 | 4.053  | 0.171  | 19.971 | 0.596  | 11.001 |
| PRDM2          | 0.592  | 0.170  | 0.509  | 0.877  | -0.315 | 10.694 | -0.607 | 41.825 | -0.654 | 0.066  |
| PRDX6          | -0.471 | 1.936  | 0.531  | 1.086  | -0.135 | 56.823 | -0.117 | 32.497 | 0.561  | 0.129  |
| Prdx6b         | 0.125  | 37.036 | 0.250  | 4.122  | 0.031  | 54.331 | 0.101  | 16.936 | 0.570  | 0.021  |
| PRELP          | -0.283 | 0.511  | -0.375 | 4.122  | 0.206  | 0.641  | 0.183  | 11.241 | 0.555  | 0.021  |
| PRICKLE1       | -0.612 | 0.052  | 0.278  | 1.086  | -0.261 | 14.770 | -0.029 | 52.656 | 0.537  | 24.398 |
| PRIM1          | 0.438  | 0.052  | -0.205 | 8.253  | -0.054 | 59.432 | 0.310  | 1.617  | -0.039 | 39.468 |
| PRIM2          | -0.374 | 44.812 | -0.462 | 0.823  | -0.709 | 9.255  | -0.092 | 13.893 | 0.256  | 4.218  |
| PRKAA2         | -0.152 | 1.431  |        |        | 0.146  | 36.892 | 0.047  | 53.829 | -0.766 | 0.021  |
| PRKACB         | -0.438 | 29.668 | 0.379  | 3.205  | 0.168  | 17.386 | -1.250 | 0.341  | -0.373 | 0.746  |
| PRKAR2A        | 0.187  | 5.928  | 0.168  | 8.253  | 0.073  | 54.331 | -0.099 | 41.825 | -0.840 | 0.021  |
| PRKAR2B        | -0.257 | 2.450  | -0.427 | 0.784  | 0.314  | 4.733  | 0.044  | 53.272 | 0.035  | 43.476 |
| PRKCA          | 0.131  | 9.997  | 0.663  | 1.772  | -0.137 | 49.127 | -0.121 | 47.420 | -0.426 | 0.039  |
| PRKCD          | 0.110  | 49.540 | -0.155 | 5.829  | -0.305 | 49.127 | 0.608  | 0.061  | 0.744  | 0.213  |
| PRKCDBP        | -0.184 | 44.812 | -0.528 | 0.877  | 0.026  | 59.793 | 0.205  | 0.573  | 0.575  | 0.021  |
| PRKCE          | -0.139 | 52.827 | 0.635  | 0.944  | -0.195 | 36.892 | -0.356 | 0.506  | -0.387 | 0.021  |
| PRKCQ          | -0.445 | 12.647 | -0.219 | 3.009  | -0.172 | 2.311  | -0.774 | 0.543  | 0.332  | 24.398 |
| PRKD3          | -0.219 | 3.157  | -0.426 | 5.829  | 0.113  | 9.255  | -0.621 | 0.061  | 0.585  | 0.649  |
| PRKG1          | -0.597 | 0.052  | 0.558  | 0.514  | 0.484  | 0.092  | 0.213  | 1.332  | -0.370 | 1.977  |
| Pri3b1         | -0.112 | 7.743  | -0.481 | 0.669  |        |        | -0.045 | 49.358 | 0.006  | 44.315 |
| PRMT3          | 0.137  | 33.231 | 0.460  | 0.514  | 0.175  | 3.475  | -0.404 | 0.061  | -0.454 | 0.391  |
| PROCR          |        |        |        |        | 0.294  | 49.127 |        |        | 1.287  | 0.021  |
| PROP1          | -0.047 | 49.540 | -0.398 | 0.669  | 0.034  | 55.771 |        |        | 0.218  | 44.315 |
| PROS1          | -0.385 | 0.052  | -0.381 | 1.086  | -0.151 | 6.932  | 0.423  | 16.936 | 0.573  | 0.039  |
| PROSC          | 0.487  | 3.157  | -0.594 | 2.614  | -0.873 | 17.386 | 0.565  | 0.061  | 0.803  | 0.391  |
| PRPF40A        | 0.213  | 21.797 | 0.614  | 0.484  | -0.164 | 5.705  | 0.228  | 7.099  | -0.432 | 0.307  |
| PRPF4B         | 0.133  | 49.540 | 0.659  | 1.029  | 0.158  | 26.120 | 0.585  | 0.573  | 0.576  | 0.021  |
| PRR13          | -0.116 | 49.540 | 0.589  | 0.107  | 0.119  | 33.124 | -0.031 | 52.656 | 0.104  | 44.052 |

|           |        |        |        |        |        |        |        |        |        |        |
|-----------|--------|--------|--------|--------|--------|--------|--------|--------|--------|--------|
| PRR15L    | 0.102  | 33.231 | -0.409 | 0.784  |        |        | -0.062 | 50.493 | 0.091  | 44.315 |
| PRR16     | -0.657 | 0.529  |        |        | 0.046  | 58.928 | -0.527 | 0.061  | -0.977 | 0.129  |
| PRR5L     | -0.745 | 0.093  | 0.210  | 1.086  | -0.072 | 36.892 | -0.205 | 47.420 | 0.253  | 36.831 |
| PRRC2C    | 0.275  | 0.398  | 0.341  | 0.300  | 0.136  | 17.386 | 0.152  | 52.124 | 0.719  | 0.119  |
| PRRX1     | -0.451 | 0.780  | -0.666 | 2.859  | -0.675 | 0.092  | -0.549 | 1.878  | 0.617  | 0.649  |
| PRRX2     | -0.273 | 33.231 | 0.234  | 0.300  | 0.062  | 58.074 | 0.818  | 0.061  | 1.262  | 0.021  |
| PRTG      | -0.194 | 4.284  | 0.318  | 0.534  | 0.476  | 0.092  | 0.261  | 47.420 | 0.233  | 1.977  |
| PSCD4     | -0.100 | 57.293 | -0.401 | 3.009  | 0.059  | 49.127 | 0.632  | 0.292  | 0.935  | 0.021  |
| PSD3      | -0.278 | 7.743  | -0.498 | 0.784  | -0.203 | 17.386 | -0.544 | 1.210  | -0.510 | 0.993  |
| PSMA6     | 0.097  | 51.013 | 0.644  | 0.180  | -0.080 | 29.328 | 0.056  | 50.493 | -0.169 | 6.001  |
| PSMA8     | -0.084 | 37.036 |        |        | 0.763  | 0.092  | 0.349  | 13.893 | -0.125 | 36.831 |
| PSMB11    | 0.105  | 15.278 |        |        | -0.260 | 10.694 | 0.227  | 47.420 | -0.488 | 0.045  |
| PSMB8     | 0.052  | 52.218 | 0.613  | 1.663  | 0.110  | 54.331 |        |        | 0.619  | 0.021  |
| PSMB9     | 0.299  | 0.511  | 0.285  | 2.773  |        |        | -0.150 | 13.893 | 0.447  | 0.119  |
| PSMC3IP   | 0.199  | 7.743  | 0.769  | 0.457  | -0.085 | 36.892 | -0.331 | 0.855  | 0.229  | 36.831 |
| PSMC5     | 0.123  | 5.928  | 0.683  | 1.029  | 0.115  | 22.899 | 0.314  | 0.109  | 0.472  | 0.213  |
| PSMD7     | 0.103  | 37.036 | 0.654  | 0.595  | -0.089 | 26.120 | 0.313  | 0.399  | 0.475  | 0.021  |
| PSME4     | 0.188  | 1.098  | 0.380  | 0.514  | 0.093  | 49.127 | -0.079 | 27.828 | -0.358 | 0.993  |
| PSMF1     | 0.265  | 0.171  | 0.659  | 0.514  | 0.126  | 41.103 | -0.351 | 2.415  | 1.318  | 0.021  |
| PSPC1     | -0.030 | 56.513 | 0.572  | 1.534  | 0.081  | 26.120 | -0.068 | 49.358 | -0.525 | 0.021  |
| PTBP1     | -0.064 | 51.013 | 0.120  | 9.629  |        |        | 0.070  | 47.420 | 0.486  | 0.119  |
| PTCHD1    | -0.546 | 0.052  | 0.084  | 5.829  | 0.320  | 49.127 | 0.150  | 50.493 | 0.142  | 40.051 |
| PTDSS2    | -0.128 | 25.771 | -0.423 | 0.784  | 0.100  | 49.127 | -0.071 | 51.354 | -0.359 | 0.977  |
| PTGDS     | -0.541 | 0.930  | -0.092 | 7.537  | 0.326  |        | -0.071 | 55.172 | -0.241 | 44.203 |
| PTGES     | 0.333  | 0.930  | 0.178  | 0.669  | 0.140  | 49.127 | 0.221  | 27.828 | 0.501  | 0.021  |
| PTGR1     | 0.109  | 33.231 | 0.492  | 0.445  | 0.113  | 22.899 | 0.084  | 52.656 | 0.348  | 0.021  |
| PTGS2     | 1.082  | 0.052  | 0.483  | 2.300  | 0.232  | 3.068  | 0.859  | 0.061  | -0.939 | 0.021  |
| PTH1R     | -0.620 | 0.262  | 0.199  | 1.772  | 0.110  | 12.575 |        |        | 0.501  | 0.977  |
| PTHLH     | -0.048 | 57.293 | -0.529 | 1.534  | 0.147  | 33.124 | -0.257 | 0.727  | -0.424 | 0.891  |
| PTPLAD2   | -0.459 | 1.431  | -0.145 | 4.122  | 0.484  | 3.068  | -0.355 | 16.936 | 0.895  | 0.021  |
| PTPN21    | -0.701 | 1.431  | 0.462  | 0.204  | 0.019  | 60.231 |        |        | 0.198  | 40.051 |
| PTPN5     | 0.029  | 54.154 |        |        | -0.152 | 49.127 | -0.074 | 27.828 | -0.582 | 0.129  |
| PTPN6     | -0.043 | 52.218 | 0.482  | 3.205  | 0.278  | 12.575 | 0.390  | 41.825 | 1.393  | 0.021  |
| PTPRC     | -0.107 | 52.218 | 0.186  | 6.703  | 0.113  | 54.331 | -0.431 | 23.450 | 0.999  | 0.021  |
| Ptprd     | 0.244  | 5.928  | 0.104  | 11.093 |        |        |        |        | 1.128  | 0.021  |
| PTPRR     | 0.080  | 52.218 | 0.449  | 1.534  | -0.284 | 0.092  | -0.200 | 0.727  | -0.297 | 0.166  |
| PUS10     | 0.118  | 33.231 | 0.360  | 1.086  | 0.192  | 0.659  | 0.064  | 49.358 | -0.376 | 0.166  |
| PUS3      | 0.154  | 7.743  | 0.455  | 0.784  | -0.136 | 10.694 | 0.413  | 0.506  | 0.541  | 0.045  |
| PVRL3     | -0.097 | 56.513 | 0.610  | 0.595  | -0.108 | 26.120 | -0.830 | 0.855  | -0.727 | 0.307  |
| PVT1      | -0.245 | 0.171  | -0.894 | 0.230  |        |        |        |        | 0.278  | 24.398 |
| PWP1      | -0.060 | 54.154 | -0.400 | 0.484  | 0.018  | 58.406 | -0.042 | 51.354 | -0.090 | 24.398 |
| PXDN      | -0.405 | 0.052  | 0.303  | 6.703  | 0.072  | 54.331 | -0.196 | 1.878  | -0.239 | 2.886  |
| PYCARD    | -0.101 | 52.218 | -0.241 | 4.122  | 0.112  | 49.127 | -0.076 | 53.272 | 1.009  | 0.021  |
| QRFPR     |        |        | -0.475 | 3.009  | 0.197  | 49.127 |        |        | -0.333 | 2.886  |
| QRICH1    | -0.033 | 55.559 | 0.449  | 1.534  | -0.120 | 49.127 | -0.399 | 19.971 | -1.115 | 0.021  |
| R3HDM1    | -0.451 | 0.262  | 0.525  | 5.829  | -0.234 | 2.056  | -0.242 | 41.825 | -0.427 | 0.119  |
| RAB11FIP4 | 0.392  | 0.262  | 0.476  | 2.300  | 0.112  | 12.575 | -0.194 | 1.617  | -0.351 | 0.993  |
| RAB1A     | 0.193  | 29.668 | 0.550  | 1.772  | -0.283 | 20.025 | -0.329 | 0.292  | -0.505 | 0.021  |
| RAB22A    | -1.026 | 0.052  | 0.239  | 0.669  | 0.336  | 41.103 | -0.297 | 0.947  | 0.424  | 0.021  |
| RAB23     | 0.130  | 37.036 | -0.469 | 2.614  | -0.123 | 33.124 | -0.502 | 0.121  | 0.459  | 0.649  |
| RAB27A    | -0.433 | 0.052  | 0.447  | 2.614  | 0.327  | 2.659  | 1.023  | 0.061  | -0.866 | 0.021  |
| RAB28     | 0.146  | 25.771 | 0.540  | 0.986  | -0.097 | 33.124 | -0.645 | 0.061  | -0.391 | 0.471  |
| RAB32     | -0.255 | 44.812 | 0.110  | 7.537  | 0.285  | 20.025 | -0.264 | 1.210  | 0.938  | 0.129  |
| RAB3C     | 0.342  | 0.126  | 0.660  | 1.534  | 0.075  | 49.127 | -0.123 | 49.358 | -0.545 | 0.045  |
| RAB3D     | -0.407 | 0.666  | -0.623 | 2.614  | 0.068  | 36.892 | -0.080 | 27.828 | 0.305  | 24.398 |
| RAB40B    | 0.216  | 4.284  | 0.749  | 1.772  | 0.044  | 49.127 | 0.152  | 47.420 | -0.251 | 0.993  |
| RAB7L1    | 0.041  | 55.170 | -0.279 | 4.122  | -0.140 | 14.770 | 0.336  | 0.109  | 0.664  | 0.021  |
| RABIF     | 0.169  | 9.997  | 0.662  | 1.534  | 0.053  | 54.331 |        |        | -0.351 | 0.391  |
| RAC1      | 0.219  | 0.171  | 0.454  | 0.877  | 0.016  | 60.505 | -0.133 | 13.893 | 0.352  | 0.021  |
| RAC2      | -0.077 | 51.013 | -0.460 | 1.663  | 0.015  | 60.505 | 0.450  | 0.855  | 0.901  | 0.021  |
| RALGAPA1  | -0.134 | 1.098  | 0.367  | 1.289  | 0.040  | 54.331 | 0.502  | 0.292  | -0.270 | 0.746  |
| RALGPS1   | 0.115  | 9.997  | 0.185  | 0.514  | -0.164 | 1.819  | -0.423 | 11.241 | -0.484 | 0.213  |
| RALY      | -0.246 | 0.666  | -0.700 | 0.663  | 0.065  | 41.103 | 0.028  | 55.172 | 0.230  | 31.624 |
| RANBP17   | -0.090 | 51.013 | -0.167 | 0.514  | 0.503  | 0.856  | -0.202 | 41.825 | 0.572  | 0.391  |
| RANBP3    | 0.114  | 37.036 | 0.099  | 11.783 | -0.194 | 12.575 | -0.662 | 0.061  | -0.578 | 0.993  |
| RAP1GAP2  | 0.121  | 18.587 | -0.147 | 6.703  | 0.134  | 49.127 | -0.401 | 7.099  | 0.661  | 0.129  |
| RAP2B     | 0.125  | 44.812 | 0.475  | 0.204  | -0.137 | 3.068  | 0.026  | 51.354 | -0.547 | 0.039  |
| RAPGEF3   | 0.037  | 49.540 | 0.181  | 2.859  |        |        | 0.094  | 49.358 | 0.512  | 0.886  |

|              |        |        |        |        |        |        |        |        |        |        |
|--------------|--------|--------|--------|--------|--------|--------|--------|--------|--------|--------|
| RAPGEF6      | -0.170 | 44.812 | 0.491  | 0.174  | -0.465 | 0.092  | -0.159 | 47.420 | -1.090 | 0.021  |
| RARB         | -0.497 | 0.398  | 0.501  | 0.300  | -0.099 | 17.386 | -0.142 | 47.420 | -0.201 | 0.307  |
| RARRES1      |        |        | -0.218 | 9.629  | -0.296 | 36.892 | -0.763 | 0.061  | 0.367  | 31.624 |
| RARRES2      | -0.106 | 49.540 | -0.243 | 3.205  | 0.075  | 54.331 | 0.111  | 27.828 | 0.812  | 0.021  |
| RASA2        | 0.274  | 2.450  | -0.893 | 1.663  | -0.109 | 29.328 | -0.139 | 47.420 | -0.628 | 0.977  |
| RASA4/RASA4B | 0.032  | 51.013 | -0.371 | 3.205  | -0.037 | 56.823 | 0.439  | 0.061  | 0.423  | 0.084  |
| RASD2        | 0.550  | 7.743  | 0.082  | 10.404 | 0.066  | 36.892 | -0.228 | 41.825 | 0.495  | 0.977  |
| RASGEF1B     | -0.380 | 1.098  | 0.656  | 0.595  | 0.523  | 0.281  | 0.170  | 1.617  | 0.402  | 0.307  |
| RASGRF2      | -0.129 | 52.218 | 0.384  | 0.877  | 0.314  | 0.440  | -0.219 | 3.866  | -0.763 | 0.021  |
| RASGRP3      | 0.011  | 56.765 | 0.396  | 0.986  | -0.068 | 57.395 | -0.178 | 41.825 | 0.597  | 0.039  |
| RASIP1       | 0.199  | 15.278 | 0.109  | 8.253  | 0.060  | 49.127 | -0.560 | 0.573  | 0.176  | 11.001 |
| RASL12       | -0.267 | 25.771 | -0.084 | 6.703  | -0.147 | 36.892 | -0.525 | 0.906  | 0.082  | 42.554 |
| RASSF2       | 0.206  | 3.157  | -0.481 | 2.859  | -0.308 | 0.402  | -0.301 | 7.099  | 0.507  | 0.977  |
| RB1CC1       | -0.347 | 0.780  | 0.187  | 8.253  | -0.284 | 0.517  | -0.257 | 13.893 | -0.484 | 0.391  |
| RBBP4        | 0.161  | 44.812 | 0.554  | 1.534  | -0.201 | 1.556  | -0.230 | 19.971 | 0.506  | 0.746  |
| RBFOX2       | -0.198 | 0.511  |        |        | 0.013  | 58.928 | 0.281  | 32.497 | 0.496  | 0.021  |
| RBM8A        | -0.148 | 2.450  | 0.496  | 0.986  | 0.090  | 54.331 | -0.715 | 0.061  | 0.440  | 11.001 |
| RBMS3        | 0.054  | 52.827 | 0.460  | 0.420  | -0.575 | 0.092  | 0.321  | 0.250  | 0.256  | 24.398 |
| RBMX         | 0.150  | 18.587 | 0.605  | 1.772  | -0.131 | 20.025 | -0.345 | 0.109  | 0.632  | 0.129  |
| RBP1         | -0.322 | 21.797 | 0.481  | 0.514  | 0.057  | 56.823 | -0.105 | 16.936 | 1.153  | 0.021  |
| RBP4         | -0.293 | 7.743  | -0.272 | 5.829  | 0.658  | 0.092  | -0.198 | 32.497 | 0.390  | 0.993  |
| RCAN1        | 0.033  | 53.690 | -0.482 | 1.212  | -0.382 | 1.309  | -0.530 | 0.177  | -0.138 | 31.624 |
| RCOR1        | 0.086  | 44.812 | -0.563 | 0.595  | 0.258  | 0.659  | 0.536  | 0.061  | -0.267 | 24.398 |
| RCSD1        | -0.293 | 44.812 | 0.123  | 10.404 |        |        | -0.635 | 1.210  | 0.706  | 0.021  |
| RDH10        | 0.376  | 0.126  | 0.684  | 1.663  | 0.272  | 0.402  | -0.282 | 11.241 | -0.405 | 8.002  |
| RDH5         | -0.153 | 49.540 | -0.214 | 6.703  | 0.160  | 10.694 | -0.160 | 47.420 | 0.630  | 0.391  |
| RECQL        | 0.098  | 29.668 | 0.731  | 0.784  |        |        | 0.639  | 0.727  | -0.230 | 1.193  |
| RELN         | -0.159 | 3.157  | 0.566  | 0.829  | 0.348  | 2.311  | 0.148  | 13.893 | 0.173  | 40.660 |
| REN          | 0.409  | 0.171  | -0.219 | 3.205  | 0.455  | 26.120 | -0.563 | 4.906  | -0.191 | 31.624 |
| RENBP        | 0.173  | 1.936  |        |        | 0.234  | 0.641  | 0.160  | 27.828 | 0.843  | 0.021  |
| REST         | -0.148 | 29.668 | 0.335  | 0.784  | 0.472  | 0.659  | 0.340  | 0.727  | 0.175  | 33.879 |
| RETSAT       | 0.197  | 25.771 | 0.297  | 0.784  | -0.055 | 58.611 | -0.425 | 0.061  | 0.709  | 0.021  |
| REV3L        | -0.431 | 0.171  | -0.276 | 0.514  | -0.078 | 26.120 | -0.570 | 7.099  | -0.456 | 0.166  |
| RFFL         | 0.142  | 37.036 | 0.635  | 0.204  | 1.194  | 0.092  | 0.435  | 27.828 | 0.417  | 0.269  |
| RFX3         | -0.737 | 0.052  | 0.435  | 5.829  | -0.425 | 0.092  | -0.544 | 23.450 | -1.070 | 0.021  |
| RGMA         | -0.134 | 49.540 | -0.355 | 2.773  | -0.333 | 0.856  | 0.505  | 0.855  | 0.777  | 0.021  |
| RGMB         | 0.324  | 0.052  | 0.665  | 0.107  | -0.130 | 17.386 | -0.285 | 0.947  | 0.595  | 0.039  |
| RGS14        | -0.106 | 49.540 | 0.235  | 5.829  | -0.304 | 22.899 |        |        | -0.581 | 0.471  |
| RGS3         | -0.128 | 25.771 | -0.478 | 2.859  | 0.076  | 55.771 | -0.595 | 0.061  | -0.214 | 24.398 |
| RGS6         | -0.544 | 0.324  | -0.222 | 0.784  |        |        | 0.055  | 47.420 | 0.758  | 0.021  |
| RGS9         | 0.245  | 1.098  | 0.743  | 0.602  | 0.373  | 6.932  | -0.249 | 41.825 | -0.383 | 0.021  |
| RHOBTB1      | 0.409  | 0.052  | -0.409 | 5.829  | -0.065 | 55.771 | -0.138 | 32.497 | -0.163 | 33.879 |
| RHOC         | -0.280 | 15.278 | 0.162  | 2.773  | 0.140  | 14.770 | 0.046  | 52.124 | 0.713  | 0.021  |
| RHOD         | 0.156  | 21.797 | 0.208  | 1.663  | 0.809  | 0.092  | -0.056 | 54.403 | 1.108  | 0.021  |
| RHOG         | -0.221 | 1.936  | -0.220 | 1.534  | 0.070  | 49.127 | 0.032  | 54.403 | 0.549  | 0.021  |
| RHOH         | 0.543  | 0.052  | -0.380 | 1.663  | -0.352 | 0.517  | -0.227 | 13.893 | 1.216  | 0.039  |
| RHOJ         | -0.378 | 0.052  | 0.229  | 1.086  | -0.270 | 26.120 | 1.555  | 0.061  | 1.110  | 0.021  |
| RHOT1        | 0.158  | 1.431  | 0.387  | 1.086  | 0.130  | 9.255  | 0.356  | 0.573  | -0.324 | 0.021  |
| RHPN2        | 0.371  | 0.780  | 0.546  | 0.986  | 0.361  | 20.025 | -0.900 | 5.543  | -0.016 | 41.878 |
| RIF1         | -0.414 | 0.093  | 0.609  | 1.534  | -0.418 | 2.056  | -1.006 | 0.061  | 0.416  | 31.624 |
| RIMS2        | 0.154  | 15.278 | 0.565  | 5.829  | 0.057  | 49.127 | -0.227 | 0.292  | -0.661 | 0.021  |
| RIN2         | 0.131  | 18.587 | 0.466  | 0.944  | -0.087 | 29.328 | 0.142  | 41.825 | 0.285  | 24.398 |
| RINT1        | 0.132  | 33.231 | 0.387  | 4.122  | -0.151 | 4.733  | -0.353 | 49.358 | -0.188 | 31.624 |
| RLBP1        | -0.253 | 7.743  | 0.275  | 1.289  | 0.139  | 26.120 | 0.027  | 53.829 | 0.783  | 0.021  |
| RLBP1        | -0.253 | 7.743  | 0.275  | 1.289  | 0.139  | 26.120 | 0.027  | 53.829 | 0.783  | 0.021  |
| RLN1/RLN2    | -0.331 | 37.036 |        |        | 0.034  | 59.793 | 1.125  | 0.727  | -0.225 | 11.001 |
| RMND1        | 0.021  | 55.170 | 0.822  | 0.180  | 0.199  | 3.068  | 0.249  | 32.497 | -0.175 | 0.891  |
| RNASEN       | -0.127 | 29.668 | -0.712 | 0.569  | 0.268  | 5.705  | -0.643 | 0.061  | -0.207 | 31.624 |
| RND1         | 0.036  | 54.701 | -0.249 | 4.122  | 0.069  | 54.331 | -0.146 | 23.450 | -0.455 | 0.119  |
| RND3         | -0.316 | 0.171  | 0.529  | 5.829  | 0.048  | 54.331 | 0.146  | 47.420 | -0.122 | 24.398 |
| RNF111       | -0.590 | 0.052  | 0.259  | 2.300  | -0.340 | 4.053  | -0.405 | 41.825 | -0.173 | 2.886  |
| RNF121       | -0.839 | 0.052  | 0.394  | 0.877  | 0.066  | 49.127 | 0.151  | 41.825 | -0.678 | 0.021  |
| RNF122       | -0.046 | 53.690 | -0.114 | 9.629  | -0.045 | 55.771 | -0.077 | 47.420 | 0.542  | 0.021  |
| RNF128       | -0.224 | 4.284  | 0.829  | 0.877  |        |        | -0.209 | 2.913  | -0.709 | 0.021  |
| RNF130       | -0.166 | 7.743  | -0.341 | 3.009  | 0.089  | 14.770 | -0.030 | 54.831 | 0.454  | 0.129  |
| RNF135       | -0.110 | 49.540 | 0.062  | 10.404 | 0.170  | 9.255  | 0.472  | 5.543  | 0.391  | 0.891  |
| RNF141       | 0.218  | 0.529  | 0.677  | 0.944  | 0.203  | 4.053  | -0.930 | 0.061  | -0.445 | 0.269  |
| RNF144B      | 0.472  | 1.098  | 0.216  | 0.484  | 0.322  | 49.127 | 0.804  | 0.727  | -0.324 | 31.624 |

|         |        |        |        |        |        |        |        |        |        |        |
|---------|--------|--------|--------|--------|--------|--------|--------|--------|--------|--------|
| RNF185  | 0.160  | 7.743  | 0.451  | 1.663  | 0.014  | 60.505 | 0.827  | 0.061  | 0.219  | 42.369 |
| RNF2    | 0.071  | 33.231 | 0.386  | 2.123  | 0.120  | 49.127 | -0.079 | 47.420 | 0.427  | 0.391  |
| RNF213  | 0.080  | 44.812 | -0.420 | 3.009  | 0.050  | 56.823 | 0.280  | 0.250  | 1.020  | 0.021  |
| RNF38   | 0.058  | 52.827 | 0.260  | 4.122  | 0.389  | 0.440  |        |        | -0.117 | 36.831 |
| RNF4    | -0.135 | 29.668 | 0.453  | 3.205  | 0.396  | 0.641  | -0.799 | 8.987  | -0.225 | 0.471  |
| RNF41   | 0.054  | 49.540 | -0.206 | 5.829  | 0.056  | 58.611 | -0.851 | 0.341  | 0.051  | 41.878 |
| RNLS    | -0.173 | 5.928  | 0.198  | 3.205  | 0.014  | 58.928 | -1.031 | 0.947  | -0.254 | 14.822 |
| ROBO1   | -0.299 | 0.666  | 0.651  | 0.420  | -0.238 | 20.025 | 0.345  | 41.825 | -0.483 | 0.021  |
| ROBO3   | 0.221  | 29.668 | -0.455 | 2.123  | 0.236  | 10.694 | 0.182  | 16.936 | 0.708  | 0.021  |
| RP2     | -0.196 | 25.771 | -0.749 | 0.893  | -0.232 | 14.770 | -0.210 | 32.497 | 0.361  | 6.001  |
| RPH3A   | 0.029  | 56.513 | -0.141 | 4.122  | 0.247  | 22.899 | -0.367 | 0.061  | -0.233 | 4.218  |
| RPL37   | 0.154  | 9.997  | 0.327  | 5.829  | 0.592  | 0.092  | -0.631 | 3.866  | -0.418 | 0.993  |
| RPL39L  | -0.622 | 12.647 | -0.746 | 0.514  |        |        | -0.374 | 49.358 | 1.401  | 0.021  |
| RPL7A   | 0.147  | 37.036 | -0.372 | 1.772  | 0.066  | 49.127 | 0.164  | 3.866  | 0.540  | 0.129  |
| RPRM    | -0.970 | 0.511  | 0.713  | 0.107  | 0.532  | 0.240  | -0.245 | 41.825 | 0.876  | 0.021  |
| RPS21   | -0.073 | 55.870 | -0.436 | 0.514  | 0.078  | 54.331 | 0.164  | 41.825 | 0.839  | 0.021  |
| Rps24   | 0.482  | 0.093  | 0.607  | 0.514  | -0.224 | 33.124 | -1.142 | 0.109  | -0.664 | 0.021  |
| RPS6KB1 | -0.553 | 0.052  | 0.545  | 1.772  | -0.425 | 36.892 | 0.189  | 1.210  | -0.354 | 0.119  |
| RPS6KC1 | -0.200 | 2.450  | 0.285  | 1.663  | 0.394  | 0.402  | 0.172  | 23.450 | 0.618  | 0.021  |
| RRAD    | -0.332 | 1.936  | 0.270  | 0.514  | 0.405  | 9.255  | 0.367  | 0.727  | 0.493  | 0.021  |
| RRAS2   | -0.131 | 15.278 | 0.530  | 1.289  | -0.158 | 29.328 | 0.128  | 41.825 | -0.406 | 0.993  |
| RRBP1   | -0.541 | 4.284  | -0.212 | 13.299 | -0.313 | 0.517  | -0.557 | 11.241 | -0.955 | 0.021  |
| RRN3    | -0.457 | 0.052  | -0.118 | 7.537  | -0.141 | 8.121  | -0.319 | 47.420 | -0.598 | 0.021  |
| RRP1B   | -0.196 | 15.278 | -0.981 | 0.445  | -0.163 | 33.124 | -0.630 | 2.913  | -0.337 | 14.822 |
| RRP8    | -0.161 | 0.930  | 0.246  | 0.420  | 0.035  | 56.823 | -0.528 | 0.341  | -0.155 | 24.398 |
| RSPO1   | -0.670 | 0.093  | -0.456 | 4.122  | 0.578  | 22.899 | 0.658  | 0.061  | 1.507  | 0.021  |
| RSPO2   | -0.927 | 7.743  | 0.766  | 0.420  |        |        | -0.185 | 23.450 | -0.831 | 0.021  |
| RSRC2   | 0.196  | 37.036 | 0.394  | 1.029  | -0.089 | 41.103 | 0.118  | 41.825 | -0.357 | 0.166  |
| RTN4    | -0.506 | 0.052  | 0.760  | 1.772  | -0.196 | 20.025 | 0.263  | 16.936 | -0.399 | 0.021  |
| RTN4R   | 0.176  | 29.668 | -0.403 | 3.205  | 0.120  | 41.103 | 0.177  | 11.241 | 0.561  | 0.119  |
| RTP4    | -0.313 | 3.157  | 0.189  | 7.537  | 0.723  | 0.092  | 0.306  | 23.450 | 0.549  | 0.119  |
| RUNX2   | 0.126  | 44.812 | -0.240 | 8.253  | 0.072  | 55.771 | 0.536  | 3.866  | -0.901 | 0.021  |
| RXRA    | 0.076  | 44.812 | -0.128 | 8.881  | -0.199 | 9.255  | 0.287  | 0.292  | 0.463  | 0.039  |
| RXRG    | -0.714 | 4.284  | -0.259 | 1.457  | -0.058 | 49.127 | 0.912  | 0.292  | 1.023  | 0.021  |
| S100A1  | -0.119 | 51.013 |        |        | 0.025  | 59.793 | 0.106  | 23.450 | 0.679  | 0.021  |
| S100A10 | 0.171  | 2.450  | 0.155  | 0.514  | 0.379  | 1.309  | 0.131  | 23.450 | 1.014  | 0.021  |
| S100A11 | -0.277 | 49.540 | 0.144  | 6.703  | 0.277  | 29.328 | -0.057 | 50.493 | 1.102  | 0.021  |
| S100A13 | -0.090 | 18.587 | 0.346  | 0.107  | 0.150  | 41.103 | 0.115  | 4.906  | 0.597  | 0.021  |
| S100A16 | 0.049  | 49.540 | 0.399  | 2.300  | 0.089  | 33.124 | -0.119 | 5.543  | 0.404  | 0.039  |
| S100A3  | 0.054  | 44.812 | -0.223 | 3.009  | 0.298  | 0.641  |        |        | 0.418  | 0.993  |
| S100A4  | -0.127 | 44.812 | -0.090 | 14.770 | 0.210  | 9.629  | 0.351  | 0.353  | 1.427  | 0.021  |
| S100A6  | -0.202 | 44.812 | 0.053  | 11.093 | 0.465  | 12.575 | 0.025  | 54.403 | 1.348  | 0.021  |
| S100B   | -0.125 | 51.013 | -0.206 | 5.829  | -0.049 | 57.395 | 0.143  | 47.420 | 0.545  | 0.101  |
| S1PR3   | -0.108 | 49.540 | -0.179 | 3.205  | -0.085 | 54.331 | 0.072  | 41.825 | 0.619  | 0.119  |
| SAG     | -0.076 | 49.540 | 0.526  | 0.986  | -0.178 | 58.074 | 0.498  | 0.061  | -1.044 | 0.084  |
| SAMD4A  | -0.535 | 0.052  | -0.128 | 5.829  | 0.299  | 14.770 | -0.313 | 0.341  | -0.319 | 14.822 |
| SAMSN1  | -0.156 | 49.540 | -0.198 | 5.829  | -0.374 | 17.386 | -0.291 | 1.617  | 1.495  | 0.021  |
| SAP130  | -0.202 | 25.771 | -0.102 | 5.829  | -0.199 | 4.733  | -0.601 | 0.727  | -0.966 | 0.066  |
| SAP18   | -0.196 | 0.930  | 0.650  | 1.212  | -0.081 | 22.899 | -0.642 | 0.061  | -0.412 | 0.084  |
| SATB1   | 0.337  | 21.797 | 0.315  | 4.122  | -0.434 | 0.092  | -0.569 | 23.450 | -0.569 | 0.021  |
| SATB2   | 0.150  | 33.231 | 0.753  | 0.986  | 0.507  | 1.309  | 0.079  | 52.124 | -0.395 | 8.002  |
| SAV1    | 0.182  | 4.284  | 0.134  | 7.537  | -0.047 | 54.331 | 0.122  | 47.420 | -0.534 | 0.746  |
| SBNO2   | -0.027 | 57.109 | -0.463 | 0.514  | 0.098  | 8.121  | -0.142 | 2.913  | -0.274 | 0.166  |
| SCAMP1  | -0.786 | 0.126  | 0.402  | 0.986  |        |        | 0.523  | 23.450 | -0.461 | 0.119  |
| SCAMP5  | 0.057  | 54.701 |        |        | 0.398  | 0.092  | -0.117 | 41.825 | -0.265 | 0.269  |
| SCAPER  | -0.213 | 21.797 | 0.419  | 4.122  | -0.434 | 0.092  | 0.312  | 32.497 | -0.247 | 14.822 |
| SCARA3  | 0.217  | 33.231 | 0.270  | 0.514  | 0.139  | 36.892 | 0.051  | 53.829 | 0.471  | 0.021  |
| SCGB3A1 | -0.445 | 0.324  | -0.355 | 0.514  | 0.369  | 17.386 | -0.119 | 41.825 | 1.126  | 0.021  |
| SCIN    | -0.583 | 0.511  | 0.495  | 0.180  | 0.042  | 54.331 | 0.735  | 0.506  | -0.236 | 14.822 |
| SCN1A   | 0.270  | 37.036 | 0.231  | 11.783 | 0.021  | 60.231 | -0.038 | 49.358 | -0.408 | 0.021  |
| SCPEP1  | 0.110  | 44.812 | -0.454 | 4.122  | 0.034  | 56.823 | 0.381  | 16.936 | 0.398  | 0.977  |
| SCRG1   | -0.267 | 29.668 | -0.325 | 2.614  |        |        | 0.101  | 32.497 | 0.616  | 0.021  |
| SDC4    | -0.303 | 7.743  | 0.740  | 0.514  | -0.183 | 4.733  | 0.222  | 32.497 | 0.767  | 0.021  |
| SDF4    | -0.072 | 37.036 | 0.307  | 2.614  | 0.058  | 54.331 | 0.107  | 47.420 | -0.432 | 0.471  |
| SDPR    | 0.073  | 37.036 | -0.399 | 0.595  |        |        | -0.479 | 0.130  | 0.234  | 4.218  |
| SDSL    | -0.035 | 56.765 | 0.266  | 5.829  | -0.074 | 36.892 | 0.090  | 51.354 | 0.479  | 0.269  |
| SEC23IP | -0.243 | 0.930  | 0.628  | 0.784  | 0.174  | 3.475  | -0.082 | 41.825 | -0.359 | 0.129  |
| SEC63   | 0.194  | 25.771 | 0.954  | 0.484  | -0.091 | 41.103 | 0.137  | 4.906  | -0.504 | 0.021  |

|          |        |        |        |        |        |        |        |        |        |        |
|----------|--------|--------|--------|--------|--------|--------|--------|--------|--------|--------|
| SECISBP2 | 0.054  | 44.812 | 0.699  | 0.180  | 0.025  | 58.928 | 0.554  | 0.061  | -0.562 | 8.002  |
| SEL1L    | -0.329 | 0.052  | -0.409 | 0.420  | -0.278 | 10.694 | 0.372  | 19.971 | -0.836 | 0.119  |
| SELENBP1 | 0.092  | 37.036 | -0.345 | 3.009  | -0.093 | 55.771 | 0.131  | 41.825 | 0.457  | 0.891  |
| SELPLG   | -0.072 | 55.870 | -0.426 | 2.773  | 0.122  | 5.705  | 0.098  | 47.420 | 0.557  | 0.021  |
| SELT     | 0.390  | 15.278 | 0.379  | 1.289  | 0.102  | 54.331 | 0.446  | 1.878  | -0.935 | 0.021  |
| SEMA3C   | -0.109 | 49.540 | 0.304  | 0.514  | 0.412  | 2.056  | 0.044  | 50.493 | 0.820  | 0.193  |
| SEMA3G   | -0.033 | 55.170 | 0.144  | 6.703  | 0.473  | 0.092  | -0.156 | 52.656 | -0.459 | 0.649  |
| SEMA5A   | 0.038  | 52.827 |        |        | -0.056 | 55.771 | -0.143 | 41.825 | -0.332 | 0.993  |
| SEPP1    | -0.174 | 12.647 | -0.300 | 2.773  | -0.069 | 54.331 | 0.136  | 27.828 | 0.524  | 0.021  |
| SEPT11   | -0.059 | 52.827 | 0.458  | 0.514  | 0.184  | 33.124 | 0.150  | 47.420 | -0.621 | 0.021  |
| SEPT6    | 0.227  | 0.511  | 0.637  | 0.569  | 0.256  | 4.053  | 0.350  | 0.061  | 0.443  | 0.084  |
| SEPT7    | 0.087  | 49.540 | 0.241  | 2.773  | -0.133 | 17.386 | -0.105 | 32.497 | -0.462 | 0.021  |
| SEPT8    | -0.196 | 44.812 | -0.361 | 0.514  | 0.131  | 22.899 | 0.120  | 19.971 | 0.644  | 0.166  |
| SERBP1   | -0.042 | 57.109 | 0.660  | 0.267  | 0.107  | 10.694 | -0.160 | 0.947  | -0.185 | 4.218  |
| SERPINA1 | -0.089 | 37.036 | -0.231 | 3.205  | 0.041  | 57.395 | 0.278  | 41.825 | 0.428  | 0.021  |
| SERPINA9 | 0.147  | 15.278 | -0.200 | 5.829  | 0.018  | 58.074 | 0.026  | 52.124 | -0.463 | 0.066  |
| SERPINF1 | -0.172 | 44.812 | -0.139 | 5.829  | 0.129  | 49.127 | 0.458  | 41.825 | 0.839  | 0.021  |
| SERPINF2 | 0.300  | 0.052  | -0.082 | 5.829  |        |        | -0.224 | 41.825 | 0.980  | 0.021  |
| SERPING1 | -0.192 | 12.647 | 0.451  | 4.122  | -0.044 | 58.611 | 0.359  | 1.332  | 0.594  | 0.307  |
| SERPINH1 | -0.309 | 21.797 | 0.083  | 7.537  | 0.127  | 9.255  |        |        | 0.708  | 0.021  |
| SERTAD1  | 0.469  | 0.666  | 0.393  | 1.086  | 0.404  | 0.092  | -0.023 | 53.272 | 0.436  | 0.649  |
| SERTAD4  | 0.132  | 18.587 | 0.593  | 0.669  | 0.080  | 41.103 | 0.445  | 0.061  | -0.036 | 41.258 |
| SES3     | -0.153 | 49.540 | 0.655  | 0.354  | 0.060  | 49.127 | -0.232 | 0.506  | 0.575  | 0.021  |
| SESTD1   | 0.073  | 49.540 | -0.075 | 12.522 | -0.041 | 56.823 | -0.159 | 13.893 | -0.531 | 0.021  |
| SET      | -0.119 | 21.797 | -0.390 | 4.122  | -0.033 | 60.231 | -0.096 | 41.825 | -0.476 | 0.307  |
| SETBP1   | 0.149  | 4.284  | -0.333 | 2.859  | 0.144  | 49.127 | -0.041 | 47.420 | 0.556  | 0.166  |
| SETD3    | -0.046 | 54.154 | 0.729  | 0.669  | 0.163  | 17.386 | 0.503  | 27.828 | -0.788 | 0.021  |
| SETD5    | -0.380 | 3.157  | 0.399  | 7.537  | -0.456 | 9.255  | 0.586  | 13.893 | -0.975 | 0.021  |
| SETD8    | 0.141  | 44.812 | 0.189  | 6.703  | 0.145  | 6.932  | -0.394 | 0.506  | -0.494 | 0.119  |
| SF3B3    | 0.107  | 52.218 | 0.439  | 0.514  | -0.201 | 12.575 | 0.143  | 41.825 | -0.440 | 0.021  |
| SFMBT1   | -0.141 | 7.743  | 0.449  | 0.514  | 0.104  | 17.386 | 0.194  | 0.947  | 0.347  | 24.398 |
| SFRP4    | 0.193  | 3.157  |        |        | -0.420 | 0.724  | 0.229  | 49.358 | -0.137 | 38.751 |
| SFSWAP   | -0.159 | 1.431  | -0.547 | 3.009  | 0.069  | 49.127 | 0.245  | 8.987  | 0.486  | 0.213  |
| SFT2D2   | 0.045  | 51.013 | 0.593  | 1.029  | 0.589  | 0.092  | 0.039  | 51.354 | 0.463  | 0.021  |
| SFTPC    | -1.247 | 0.052  | 0.250  | 0.602  | -0.244 | 12.575 | -0.737 | 3.866  | -1.201 | 0.021  |
| SFXN1    | -0.104 | 52.827 | -0.266 | 4.122  | -0.192 | 2.659  | -0.296 | 7.099  | -0.493 | 0.021  |
| SGCZ     | -0.614 | 0.666  | -0.424 | 3.009  |        |        |        |        | 0.032  | 31.624 |
| SGPL1    | -0.117 | 53.690 | -0.151 | 5.829  | 0.275  | 1.309  |        |        | 0.443  | 0.129  |
| SGSH     | 0.457  | 0.780  | 0.542  | 1.086  | 0.449  | 1.309  | 0.550  | 0.121  | 0.297  | 24.398 |
| SGTB     |        |        | 0.531  | 1.772  | 0.187  | 2.659  | -0.095 | 50.493 | -0.453 | 0.391  |
| SH3BGRL  | 0.040  | 49.540 | 0.370  | 5.829  | -0.215 | 26.120 | -0.297 | 11.241 | -0.434 | 0.119  |
| SH3BP1   | 0.134  | 33.231 | -0.535 | 4.122  | 0.073  | 41.103 | 0.039  | 52.656 | 0.453  | 0.039  |
| SH3D19   | -0.421 | 0.171  | 0.486  | 2.859  | -0.423 | 22.899 | -0.395 | 4.906  | -0.518 | 0.746  |
| SH3GL2   | -0.161 | 25.771 | -0.275 | 3.205  | -0.153 | 41.103 | -0.169 | 0.727  | 0.771  | 0.021  |
| SH3GL3   | -0.414 | 0.511  | -0.247 | 0.514  | 0.210  | 17.386 | 0.092  | 41.825 | 0.093  | 38.751 |
| SH3KBP1  | -0.512 | 0.170  | 0.749  | 0.669  | -0.265 | 0.092  | 0.172  | 2.415  | -0.012 | 41.258 |
| SH3PXD2B | -0.088 | 44.812 | 0.263  | 8.253  | 0.343  | 4.733  | 0.193  | 41.825 | 0.490  | 0.193  |
| SH3RF1   | 0.196  | 44.812 | 0.463  | 0.784  | -0.362 | 36.892 | -0.740 | 0.061  | 0.390  | 0.993  |
| SH3TC1   | -0.025 | 56.765 | -0.185 | 8.881  | 0.260  | 14.770 | -0.411 | 0.506  | 1.073  | 0.021  |
| SHANK2   | 0.079  | 29.668 | 0.191  | 0.514  | -0.165 | 8.121  | 0.340  | 0.353  | 0.588  | 0.021  |
| SHCBP1   | -0.284 | 0.936  | -0.521 | 0.805  | 0.164  | 12.575 | 0.062  | 52.124 | 0.231  | 31.624 |
| SHMT1    | 0.077  | 52.218 | -0.334 | 3.009  | -0.225 | 49.127 | -0.690 | 0.061  | -0.218 | 0.269  |
| SHROOM2  | -0.075 | 37.036 | -0.149 | 10.404 | 0.104  | 29.328 | -0.527 | 0.292  | 0.170  | 4.218  |
| SIK1     | 0.190  | 37.036 | 0.539  | 0.107  | 0.408  | 0.724  | -0.954 | 0.855  | -0.536 | 0.021  |
| SIPA1L1  | 0.203  | 37.036 | -0.400 | 0.669  | 0.014  | 59.793 | -0.143 | 27.828 | -0.187 | 4.218  |
| SIPA1L3  | 0.320  | 15.278 | 0.642  | 0.595  | -0.086 | 49.127 | 0.017  | 55.172 | 0.073  | 40.660 |
| SIRT1    | 0.136  | 29.668 | 0.891  | 1.029  | -0.519 | 0.402  | -0.245 | 27.828 | 0.455  | 0.021  |
| SIVA1    | 0.016  | 55.170 | -0.270 | 5.829  |        |        | 0.086  | 47.420 | 0.534  | 0.021  |
| SKAP1    | -0.169 | 52.218 | 0.179  | 7.537  | 0.397  | 0.641  | 0.468  | 1.210  | -0.101 | 24.398 |
| SKI      | -0.492 | 0.930  | 0.157  | 0.944  | -0.342 | 0.440  | -0.336 | 23.450 | -0.270 | 4.218  |
| SLA      | 0.716  | 0.126  | -0.336 | 3.205  | -0.303 | 0.440  | -0.289 | 27.828 | 0.561  | 0.021  |
| SLAMF9   | 0.144  | 1.431  | -0.285 | 3.205  | -0.196 | 1.556  | 0.270  | 0.727  | 0.761  | 0.021  |
| SLC11A1  | 0.046  | 52.827 |        |        | 0.018  | 57.395 | -0.102 | 54.831 | 1.248  | 0.021  |
| SLC11A2  | 0.160  | 9.997  | 0.517  | 1.086  | -0.068 | 49.127 | 0.126  | 49.358 | 0.464  | 0.307  |
| SLC12A4  | -0.048 | 49.540 | 0.485  | 0.595  | 0.206  | 0.517  | 0.071  | 52.124 | 0.624  | 0.471  |
| SLC12A7  | 0.080  | 49.540 | 0.301  | 0.944  | -0.300 | 1.309  | -0.136 | 47.420 | 0.416  | 0.391  |
| SLC14A1  | 0.248  | 9.997  | 0.449  | 0.514  | -0.202 | 3.475  | 0.233  | 0.341  | 0.771  | 0.021  |
| SLC15A2  | 0.346  | 0.262  | 0.707  | 0.445  | 0.643  | 1.819  | 0.167  | 32.497 | -0.263 | 4.218  |

|          |        |        |        |        |        |        |        |        |        |        |
|----------|--------|--------|--------|--------|--------|--------|--------|--------|--------|--------|
| SLC16A1  | 0.145  | 3.157  | -0.169 | 5.829  | -0.426 | 4.733  | 0.468  | 0.109  | 0.979  | 0.021  |
| SLC16A9  | 0.010  | 57.293 | 0.156  | 5.829  |        |        | 0.515  | 0.061  | 0.095  | 36.831 |
| SLC17A2  | -0.148 | 0.529  | -0.629 | 2.859  | 0.016  | 58.406 | 0.024  | 55.172 | 0.124  | 24.398 |
| SLC17A5  | 0.307  | 0.171  | 0.428  | 5.829  | -0.065 | 55.771 | -0.479 | 0.353  | -0.250 | 0.391  |
| SLC18A2  | -1.089 | 0.093  | -0.197 | 0.784  | -0.720 | 0.092  | -1.013 | 0.250  | -0.068 | 31.624 |
| SLC1A2   | 0.265  | 0.398  | -0.848 | 0.107  | 0.246  | 1.098  | 0.282  | 1.617  | -0.822 | 0.021  |
| SLC1A4   | -0.104 | 44.812 | -0.372 | 0.784  | -0.126 | 22.899 | -0.126 | 2.913  | -0.133 | 31.624 |
| SLC22A1  | -0.364 | 7.743  | -0.389 | 0.784  | -0.153 | 10.694 | -0.149 | 41.825 | -0.277 | 11.001 |
| SLC22A15 | 0.149  | 18.587 | -0.417 | 4.122  | 0.048  | 55.771 | 0.209  | 41.825 | 0.533  | 0.066  |
| SLC22A2  | 0.045  | 51.013 | -0.636 | 0.300  | -0.246 | 55.771 |        |        | 0.285  | 40.051 |
| SLC22A4  | 0.035  | 53.690 | 0.338  | 0.514  |        |        | -0.239 | 0.855  | 1.307  | 0.021  |
| SLC25A17 | 0.166  | 18.587 | 0.352  | 0.204  | -0.216 | 10.694 | -0.458 | 0.061  | -0.467 | 0.119  |
| SLC26A3  |        |        | -0.735 | 2.859  | 0.033  | 55.771 | -0.038 | 49.358 | -0.417 | 0.993  |
| SLC27A2  | -0.285 | 0.093  | 0.353  | 1.534  | -0.523 | 1.819  | -0.159 | 50.493 | -1.739 | 0.021  |
| SLC27A3  | -0.043 | 56.765 | 0.476  | 2.773  | 0.258  | 0.517  | -0.433 | 4.906  | -0.241 | 6.001  |
| SLC27A5  | 0.106  | 44.812 | 0.344  | 0.180  | 0.331  | 0.092  | -0.729 | 0.617  | -0.402 | 14.822 |
| SLC2A4   | -0.171 | 51.013 | 0.172  | 0.514  | -0.340 | 4.733  | -0.579 | 1.878  | 1.434  | 0.021  |
| SLC2A5   | -0.073 | 29.668 | 0.317  | 6.703  | -0.090 | 41.103 | 0.478  | 0.061  | 0.324  | 11.001 |
| SLC31A2  | 0.252  | 3.157  | 0.542  | 0.445  | -0.231 | 41.103 | -0.148 | 0.855  | 0.075  | 38.751 |
| SLC35D1  | -0.216 | 44.812 | 0.223  | 7.537  | 0.021  | 60.231 |        |        | 0.539  | 0.600  |
| SLC35D3  | 0.161  | 37.036 | -0.545 | 0.264  | 0.113  | 20.025 | 0.122  | 27.828 | -0.103 | 39.468 |
| SLC35F3  | -0.132 | 3.157  | -0.310 | 6.703  | -0.107 | 8.121  | -0.192 | 13.893 | 0.414  | 0.119  |
| SLC38A1  | -0.256 | 29.668 | 0.947  | 0.877  | -0.207 | 12.575 | -0.335 | 0.061  | -0.704 | 0.021  |
| SLC39A12 | -0.635 | 7.743  | 0.309  | 8.881  | -0.076 | 49.127 | -0.160 | 32.497 | 0.410  | 0.021  |
| SLC39A14 | 0.999  | 0.052  | 0.336  | 4.122  | 0.049  | 54.331 | -0.066 | 32.497 | 0.166  | 8.002  |
| SLC46A1  | -0.183 | 44.812 | -0.455 | 0.230  | -0.112 | 26.120 | 0.144  | 32.497 | 0.279  | 1.977  |
| SLC47A1  | -0.364 | 0.171  | -0.526 | 0.107  | -0.325 | 10.694 | 0.590  | 16.936 | 0.313  | 37.824 |
| SLC4A10  | -0.336 | 0.052  | -0.532 | 2.859  | -0.281 | 0.641  | 0.240  | 41.825 | 0.707  | 0.021  |
| SLC6A13  | 0.914  | 0.052  | 0.128  | 9.629  | 0.711  | 0.659  | 0.843  | 0.947  | 0.645  | 0.213  |
| SLC6A15  | -0.791 | 0.052  | 0.680  | 2.300  | -1.074 | 0.092  | 0.506  | 41.825 | -1.432 | 0.021  |
| SLC6A9   | -0.121 | 12.647 | -0.257 | 6.703  | 0.073  | 41.103 | 0.301  | 2.415  | 0.456  | 0.993  |
| SLC7A1   | -0.134 | 1.431  | -0.639 | 2.773  | -0.051 | 49.127 | -0.195 | 0.292  | -0.466 | 0.084  |
| SLC7A3   | -0.166 | 7.743  | 0.290  | 4.122  | 0.028  | 57.395 | 0.532  | 0.506  | 0.546  | 0.119  |
| SLC7A7   | -0.241 | 44.812 | -0.320 | 0.784  | 0.174  | 29.328 | 0.442  | 11.241 | 0.671  | 0.039  |
| SLC8A3   | -0.188 | 1.936  | -0.422 | 0.663  | 0.054  | 55.771 | 0.068  | 50.493 | -0.130 | 11.001 |
| SLCO1A2  | -0.164 | 0.324  | -0.694 | 2.614  | -0.035 | 57.395 | 0.066  | 49.358 | 0.216  | 24.398 |
| SLco1a5  | -0.108 | 25.771 | -0.694 | 0.614  | -0.035 | 57.395 | 0.066  | 49.358 | 0.216  | 24.398 |
| SLCO2A1  | -0.356 | 25.771 | -0.404 | 0.784  |        |        | 0.465  | 3.866  | -0.268 | 0.649  |
| SLCO2B1  | 0.041  | 52.827 | 0.462  | 1.772  | 0.095  | 41.103 | 0.176  | 7.099  | 0.840  | 0.021  |
| SLCO3A1  | -0.062 | 51.013 | 0.066  | 8.253  | -0.285 | 4.053  | 0.110  | 41.825 | -0.503 | 0.021  |
| SLCO4A1  | -0.354 | 0.171  | 0.464  | 0.595  | -0.556 | 0.092  | 0.549  | 16.936 | 0.769  | 0.021  |
| SLFN2    | -0.640 | 0.171  | 0.179  | 9.629  | 0.226  | 10.694 | 0.327  | 32.497 | 0.990  | 0.021  |
| SLIT2    | -0.464 | 0.052  | -0.250 | 4.122  | -0.101 | 54.331 | -0.579 | 27.828 | 0.091  | 44.052 |
| SLMAP    | -0.360 | 33.231 | -0.455 | 1.772  | -0.409 | 0.659  | -0.110 | 8.987  | -0.445 | 0.039  |
| SLPI     | -0.204 | 2.450  | -0.368 | 2.859  | 0.523  | 0.092  |        |        | 0.388  | 24.398 |
| SMAD3    | 0.184  | 4.284  | 0.472  | 0.457  | 0.317  | 22.899 | 0.186  | 52.656 | 0.316  | 31.624 |
| SMARCA5  | 0.069  | 51.013 | 0.803  | 0.595  | 0.062  | 54.331 | 0.143  | 50.493 | -0.468 | 0.084  |
| SMC6     | -0.206 | 44.812 | 0.613  | 0.230  | 0.174  | 12.575 | 0.440  | 0.947  | -0.232 | 0.129  |
| SMEK1    | -0.200 | 9.997  | 0.692  | 0.784  | -0.399 | 4.733  | -0.540 | 27.828 | -0.895 | 0.021  |
| SMG6     | -0.557 | 0.052  | 0.600  | 0.514  | -0.350 | 0.240  | -0.568 | 8.987  | 0.604  | 0.119  |
| SMG7     | 0.276  | 0.171  | 0.283  | 1.663  | 0.195  | 22.899 | -0.932 | 0.061  | 0.401  | 0.021  |
| SMNDC1   | 0.023  | 54.701 | 0.585  | 0.893  | 0.048  | 54.331 | 0.098  | 41.825 | -0.283 | 6.001  |
| SMOC2    | -0.658 | 0.052  | -0.373 | 0.180  | -0.358 | 4.733  | 0.233  | 3.866  | -0.222 | 24.398 |
| SMPD2    | -0.145 | 9.997  | 0.329  | 3.205  | 0.087  | 49.127 | -1.044 | 0.061  | 0.182  | 33.879 |
| SMPD3    | -0.880 | 0.052  | -0.490 | 0.267  | -0.202 | 33.124 | 0.068  | 47.420 | 0.150  | 38.751 |
| SMS      | -0.265 | 33.231 | 0.517  | 0.107  | -0.238 | 17.386 | 0.053  | 47.420 | -0.946 | 0.021  |
| SMTNL2   | 0.371  | 0.171  | 0.211  | 8.881  |        |        | -0.638 | 0.061  | -0.563 | 0.021  |
| SMUG1    | 0.055  | 44.812 | 0.583  | 0.669  | 0.290  | 49.127 | 0.121  | 23.450 | -0.444 | 0.993  |
| SMURF1   | 0.258  | 0.324  | 0.298  | 0.300  | 0.252  | 0.659  | 0.088  | 23.450 | 0.509  | 0.119  |
| SNAP25   | 0.011  | 56.513 | 0.233  | 10.404 | 0.205  | 54.331 | -0.207 | 0.130  | -0.481 | 0.119  |
| SNCA     | -0.127 | 51.013 | 0.262  | 5.829  | -0.098 | 58.074 |        |        | -0.429 | 0.746  |
| SNF1LK   | 0.999  | 0.052  | 0.539  | 0.107  | 0.408  | 0.724  | -0.954 | 0.855  | 1.405  | 0.021  |
| SNTG2    | -0.793 | 0.171  | 0.513  | 1.289  | -0.171 | 54.331 | -0.467 | 0.947  | -0.953 | 0.746  |
| SNX16    | 0.202  | 44.812 | 0.508  | 0.420  | -0.149 | 20.025 | -0.131 | 16.936 | -0.491 | 0.066  |
| SNX33    | -0.093 | 49.540 | 0.205  | 0.514  | 0.198  | 9.255  |        |        | 0.410  | 0.021  |
| snx4     | 0.061  | 49.540 | 0.475  | 1.289  | 0.121  | 55.771 | -0.191 | 23.450 | 0.534  | 0.021  |
| SNX7     | -0.145 | 1.431  | 0.252  | 7.537  | -0.059 | 59.432 | -0.147 | 13.893 | -0.446 | 0.021  |
| SNX8     | -0.068 | 52.218 | -0.148 | 5.829  | 0.095  | 49.127 | -0.427 | 0.061  | 0.069  | 39.468 |



|            |        |        |        |        |        |        |        |        |        |        |
|------------|--------|--------|--------|--------|--------|--------|--------|--------|--------|--------|
| SOAT1      | -0.691 | 0.052  | -0.447 | 4.122  | 0.291  | 22.899 | -1.277 | 0.061  | -0.497 | 0.993  |
| SOCS2      | -0.609 | 0.052  | 0.413  | 1.663  | -0.400 | 0.092  | -0.473 | 27.828 | -1.770 | 0.021  |
| SOCS3      |        |        | -0.333 | 2.859  | 0.279  | 17.386 | -0.306 | 0.130  | 0.813  | 0.021  |
| SOCS4      | 0.196  | 44.812 | 0.707  | 0.669  | 0.118  | 29.328 |        |        | -0.465 | 0.119  |
| SOCS6      | -0.057 | 55.170 | 0.542  | 0.107  | 0.018  | 58.406 | 0.503  | 1.332  | -0.357 | 31.624 |
| SORCS2     | -0.049 | 54.154 | -0.122 | 7.537  | -0.229 | 49.127 |        |        | -0.401 | 8.002  |
| SOS1       | 0.576  | 0.930  | 1.399  | 0.107  | 0.176  | 14.770 | 0.348  | 0.399  | -0.526 | 0.021  |
| SOSTDC1    |        |        | 0.170  | 4.122  | -1.042 | 8.121  | 0.535  | 1.210  | -0.898 | 0.983  |
| SOX10      | -0.156 | 3.157  | -0.559 | 0.784  |        |        | 0.111  | 41.825 | 0.484  | 0.166  |
| SOX11      | -0.546 | 0.262  | 0.626  | 0.944  | 0.114  | 49.127 | 1.134  | 0.061  | 1.246  | 0.021  |
| SOX14      | -0.156 | 0.930  | -0.625 | 0.829  | -0.042 | 54.331 | 0.037  | 53.272 | 0.164  | 11.001 |
| SOX15      | -0.460 | 0.930  | -0.761 | 2.773  |        |        | 0.034  | 53.829 | 0.272  | 24.398 |
| Sox17      | 0.037  | 51.013 | 0.693  | 0.514  | 0.247  | 1.556  | -0.294 | 1.878  | -0.456 | 0.021  |
| SOX21      | -0.411 | 0.171  | -0.410 | 3.009  | 0.147  | 22.899 | -0.621 | 0.061  | -0.307 | 0.746  |
| SOX9       | 0.183  | 15.278 | 0.592  | 0.354  | -0.274 | 0.724  | -0.336 | 0.250  | 0.838  | 0.021  |
| SP110      | 0.412  | 3.157  | 0.294  | 8.881  | -0.093 | 54.331 | 0.244  | 41.825 | 0.996  | 0.021  |
| SP4        | -0.410 | 0.093  | -0.620 | 0.107  | -0.419 | 1.556  | 0.283  | 0.353  | 0.354  | 0.471  |
| SPARC      | -0.276 | 0.171  | -0.494 | 2.773  | -0.179 | 5.705  | 0.077  | 47.420 | 0.842  | 0.021  |
| SPATA5     | 0.110  | 44.812 | -0.565 | 2.123  | -0.077 | 49.127 | 0.380  | 13.893 | -0.095 | 24.398 |
| SPINT2     |        |        | 0.133  | 6.703  | 0.136  | 29.328 | 0.432  | 1.878  | 0.812  | 0.471  |
| SPOCK1     | 0.211  | 0.324  | 0.169  | 6.703  | -0.526 | 3.475  | -0.433 | 11.241 | -0.755 | 0.993  |
| SPOCK3     | 0.056  | 51.013 | -0.102 | 10.404 | -0.418 | 1.556  |        |        | -0.708 | 0.084  |
| SPON1      | 0.045  | 52.827 | 0.378  | 4.122  | 0.333  | 3.068  | 0.492  | 0.947  | 0.266  | 24.398 |
| SPP1       | -0.396 | 0.324  | 0.892  | 0.107  | -0.205 | 12.575 | -0.667 | 0.855  | 1.517  | 0.021  |
| SPPL2A     | -0.257 | 0.529  | 0.530  | 0.212  | -0.367 | 12.575 | 0.097  | 52.124 | 0.208  | 36.831 |
| SPRED1     | -0.300 | 0.262  |        |        | 0.187  | 41.103 | 0.106  | 41.825 | 0.548  | 0.471  |
| Sprr1a     | -0.043 | 49.540 | -0.157 | 5.829  |        |        | 0.022  | 55.172 | 0.433  | 0.119  |
| SPRY4      | 0.448  | 18.587 | -0.398 | 0.784  | 0.169  | 29.328 | -0.226 | 11.241 | 0.818  | 0.021  |
| SPSB2      | 0.147  | 25.771 |        |        | 0.014  | 60.505 | 0.080  | 49.358 | -0.516 | 0.993  |
| SPTBN1     | 0.296  | 0.529  | 0.718  | 0.514  | -0.628 | 0.724  | 0.289  | 41.825 | 0.530  | 0.993  |
| SPTLC2     | 0.215  | 7.743  | -0.560 | 1.086  | -0.184 | 1.098  | -0.513 | 0.177  | -0.060 | 40.051 |
| SQRDL      | -0.179 | 0.666  | 0.384  | 0.420  | 0.271  | 41.103 | -0.077 | 41.825 | 0.552  | 0.021  |
| SRCAP      | -0.494 | 0.052  | 0.175  | 0.986  | -0.230 | 3.475  | -0.265 | 0.130  | 0.221  | 4.218  |
| SRD5A1     | 0.050  | 55.170 | 0.498  | 0.180  | -0.128 | 29.328 | -0.334 | 11.241 | -0.436 | 0.129  |
| SREBF1     | -0.148 | 44.812 |        |        | -0.049 | 55.771 | -0.116 | 41.825 | 0.576  | 0.039  |
| SREK1      | -0.084 | 44.812 | 0.544  | 1.457  | -0.256 | 1.309  | -0.051 | 41.825 | -0.418 | 0.021  |
| SRGAP1     | 0.710  | 0.052  | 0.405  | 1.289  | -0.384 | 6.932  | -0.987 | 0.061  | -0.549 | 0.021  |
| SRGN       | -0.431 | 0.171  | -0.532 | 3.009  | 0.036  | 58.074 | 0.136  | 41.825 | 0.798  | 0.021  |
| SRL        |        |        |        |        | -0.255 | 29.328 | 0.088  | 50.493 | -0.503 | 0.891  |
| SRPK3      | 0.307  | 44.812 | 0.558  | 1.663  | 0.136  | 22.899 | 0.723  | 0.061  | -0.437 | 0.066  |
| SRPR       | -0.360 | 0.666  | 0.577  | 1.457  | 0.167  | 5.705  | 0.283  | 19.971 | -0.366 | 0.993  |
| SSBP1      | -0.147 | 5.928  | 0.795  | 0.986  | 0.224  | 12.575 | -0.576 | 2.913  | -0.385 | 0.166  |
| SSTR2      | -0.259 | 12.647 | -0.168 | 0.514  | -0.391 | 3.475  | -0.209 | 16.936 | -0.627 | 0.391  |
| SSX2IP     | 0.264  | 44.812 | 0.234  | 8.881  | 0.153  | 41.103 | -0.557 | 0.855  | -0.250 | 4.218  |
| ST14       | -0.113 | 44.812 | -0.560 | 2.859  | -0.057 | 54.331 | 0.077  | 27.828 | 0.423  | 0.746  |
| ST18       | -0.304 | 44.812 | 0.271  | 8.253  | 0.043  | 58.928 | -0.893 | 0.250  | -0.312 | 24.398 |
| St3gal3    | -0.839 | 0.052  | -0.303 | 6.703  | 0.341  | 33.124 | 0.831  | 0.130  | 0.570  | 0.993  |
| ST5        | -0.119 | 49.540 |        |        | 0.402  | 3.475  | -0.135 | 41.825 | -0.529 | 0.307  |
| ST6GALNAC2 | -0.103 | 52.218 | -0.392 | 0.784  | 0.421  | 0.402  | 0.512  | 0.121  | 0.050  | 44.315 |
| ST8SIA6    | -0.481 | 0.093  | 0.544  | 2.300  | -0.648 | 6.932  | -0.625 | 2.415  | -0.490 | 0.993  |
| STAM       | 0.278  | 9.997  | 0.649  | 1.212  | 0.380  | 4.733  | -0.056 | 47.420 | -0.492 | 0.021  |
| STAP2      | 0.138  | 49.540 | -0.249 | 2.123  | -0.188 | 20.025 | -0.273 | 16.936 | -0.844 | 0.039  |
| STAR       | 0.251  | 5.928  | 0.769  | 0.595  | 0.318  | 3.068  | -0.350 | 50.493 | -0.594 | 0.021  |
| STARDB     | -0.187 | 2.450  | 0.182  | 7.537  | 0.570  | 0.517  | -0.394 | 1.617  | 0.889  | 0.166  |
| STAT1      | -0.313 | 0.324  | 0.528  | 0.264  | -0.210 | 0.641  | -0.603 | 0.250  | -0.628 | 0.021  |
| STAT3      | -0.252 | 1.431  | 0.406  | 0.669  | 0.099  | 54.331 | -0.291 | 13.893 | 0.276  | 31.624 |
| STAT5B     | -0.635 | 0.666  | -0.149 | 7.537  | 0.348  | 1.309  | -0.202 | 11.241 | 0.589  | 0.045  |
| STBD1      | 0.820  | 0.052  | 0.571  | 0.569  | -0.458 | 10.694 | 1.105  | 11.241 | -0.235 | 31.624 |
| STC1       | -0.345 | 0.052  | 0.308  | 1.772  | -0.354 | 4.733  | -0.304 | 41.825 | -1.496 | 0.021  |
| STEAP3     | -0.529 | 0.262  | -0.249 | 4.122  | -0.615 | 0.240  | -0.392 | 47.420 | -1.051 | 0.021  |
| STK35      | -0.409 | 15.278 | -0.453 | 0.784  | 0.290  | 49.127 | -0.292 | 19.971 | -0.518 | 0.021  |
| STRADA     | 0.020  | 56.874 | -0.183 | 2.614  | -0.197 | 36.892 | 0.085  | 47.420 | -0.744 | 0.021  |
| STRBP      | -0.043 | 57.109 | 0.881  | 1.212  | 0.091  | 14.770 | 0.086  | 27.828 | -0.270 | 0.119  |
| STRN       | 0.413  | 0.930  | 0.822  | 0.354  | -0.057 | 54.331 | 0.399  | 0.109  | -0.157 | 4.218  |
| STT3B      | -0.266 | 21.797 | 0.419  | 0.514  | 0.072  | 49.127 | -0.401 | 19.971 | -0.720 | 0.269  |
| STX16      | -0.460 | 9.997  | 0.246  | 0.944  | 0.275  | 0.517  | -0.317 | 1.617  | -0.553 | 0.269  |
| STX3       | 0.196  | 52.218 | 0.888  | 0.107  | 0.604  | 4.733  | -1.209 | 0.250  | 0.573  | 0.891  |
| STX5       | -0.067 | 49.540 | 0.286  | 4.122  | 0.074  | 41.103 | 0.315  | 0.061  | -0.487 | 0.021  |

|          |        |        |        |       |        |        |        |        |        |        |
|----------|--------|--------|--------|-------|--------|--------|--------|--------|--------|--------|
| SULF1    | -0.680 | 0.052  |        |       | 0.090  | 55.771 | 0.137  | 47.420 | 1.352  | 0.021  |
| SULT1A1  | 0.298  | 25.771 | 0.294  | 5.829 | -0.353 | 3.475  | 0.184  | 50.493 | 0.566  | 0.119  |
| SULT6B1  | 0.176  | 49.540 | -0.692 | 0.784 | -0.385 | 3.068  | -0.309 | 47.420 | -0.227 | 24.398 |
| SUPT3H   | 0.030  | 52.827 | 0.577  | 0.514 |        |        | 0.150  | 50.493 | -0.376 | 0.166  |
| SUSD3    | -0.225 | 1.098  | -0.208 | 5.829 |        |        | -0.103 | 49.358 | 0.402  | 0.045  |
| SUV39H2  | 0.327  | 18.587 | 0.613  | 0.300 | -0.350 | 17.386 | 0.666  | 4.906  | -1.116 | 0.021  |
| SUV420H1 | 0.434  | 15.278 | 0.565  | 0.174 | -0.725 | 0.092  | -0.331 | 27.828 | 0.049  | 41.258 |
| SV2B     | -0.082 | 29.668 | 0.548  | 2.773 | -0.112 | 49.127 | -0.047 | 49.358 | -0.558 | 0.269  |
| SYCE2    | -0.069 | 55.559 | -0.328 | 0.877 | -0.529 | 5.705  | 0.275  | 0.109  | -0.148 | 38.751 |
| SYK      | 0.055  | 44.812 |        |       | 0.067  | 58.406 | -0.771 | 0.130  | 0.388  | 0.391  |
| SYNCRIP  | -0.226 | 49.540 | 0.747  | 2.300 | -0.787 | 0.281  | 0.264  | 7.099  | -0.562 | 0.021  |
| SYNE1    | -0.234 | 5.928  | 0.631  | 2.123 | -0.085 | 56.823 | -0.223 | 2.415  | -0.746 | 0.307  |
| SYNE2    | -0.339 | 0.052  | -0.395 | 4.122 | 0.103  | 41.103 | -0.915 | 0.061  | 0.582  | 11.001 |
| SYNGR1   | 0.328  | 1.936  | -0.609 | 1.663 | 0.135  | 26.120 | -0.215 | 1.878  | 0.902  | 0.021  |
| SYNGR2   | -0.294 | 3.157  | -0.093 | 8.253 | 0.174  | 0.856  | 0.296  | 7.099  | 0.471  | 0.471  |
| SYNJ2    | 0.499  | 0.171  | 0.213  | 5.829 | 0.271  | 0.440  | 0.167  | 7.099  | 0.947  | 0.021  |
| SYNPO    | 0.195  | 21.797 | -0.263 | 4.122 | 0.392  | 6.932  | -0.250 | 47.420 | 0.710  | 0.471  |
| SYP      | 0.416  | 0.666  | 0.148  | 2.300 |        |        | -0.098 | 5.543  | -0.204 | 0.649  |
| SYPL1    | -0.256 | 0.171  | 0.539  | 4.122 | 0.171  | 1.309  | 0.526  | 0.061  | -0.437 | 0.977  |
| SYT10    | 0.489  | 0.052  | -0.092 | 8.253 | -0.073 | 54.331 |        |        | -0.087 | 31.624 |
| SYT17    | -0.105 | 55.559 | 0.252  | 6.703 | 0.454  | 0.092  | 0.079  | 51.354 | -0.523 | 4.218  |
| SYT4     | 0.088  | 29.668 | 0.779  | 1.457 | -0.169 | 12.575 | -0.303 | 19.971 | -0.513 | 0.269  |
| TAC1     | -0.437 | 12.647 | 0.516  | 0.445 | 0.168  | 2.311  | -0.162 | 13.893 | -0.906 | 0.269  |
| TAC10    | 0.286  | 0.052  | 0.535  | 0.514 | 0.326  | 0.092  | 0.125  | 16.936 | -0.412 | 0.021  |
| TAF9B    | 0.111  | 49.540 | 0.776  | 0.669 | 0.046  | 54.331 |        |        | -0.617 | 0.993  |
| TAGLN    | 0.522  | 0.529  | 0.468  | 0.514 | 0.568  | 0.092  | -0.631 | 0.109  | 1.103  | 0.021  |
| TANC1    | -0.032 | 57.367 | 0.669  | 0.107 | 0.126  | 49.127 | 0.227  | 16.936 | 0.228  | 0.391  |
| TARDBP   | -0.273 | 0.529  | 0.715  | 1.086 | -0.135 | 4.053  | 0.351  | 23.450 | -0.398 | 0.045  |
| TAS1R1   | 0.070  | 44.812 | -0.216 | 2.300 | 0.135  | 26.120 | 0.394  | 0.399  | 0.224  | 33.879 |
| TASP1    | 0.221  | 21.797 | 0.601  | 0.300 | 0.302  | 8.121  | -0.366 | 3.866  | -0.285 | 1.193  |
| TBC1D2   | -0.178 | 0.511  | -0.714 | 2.773 | 0.063  | 55.771 | 0.211  | 32.497 | 0.669  | 0.021  |
| TBC1D4   | -0.194 | 5.928  | -0.178 | 4.122 | -0.146 | 49.127 | 0.716  | 0.250  | 0.779  | 0.021  |
| TBPL1    | -0.265 | 1.431  | 0.847  | 0.569 | 0.256  | 6.932  | -0.181 | 47.420 | -0.364 | 0.993  |
| TBX1     |        |        | 0.354  | 8.881 | 0.984  | 0.641  | 0.520  | 2.913  | 0.315  | 8.002  |
| TBXAS1   | -0.226 | 33.231 | 0.465  | 0.986 | 0.240  | 49.127 | 0.112  | 47.420 | 1.216  | 0.021  |
| TCF12    | 0.358  | 1.936  | 0.427  | 0.877 | -0.047 | 55.771 | -1.118 | 0.399  | -0.439 | 24.398 |
| TCF7L2   | -0.287 | 5.928  | 0.395  | 0.514 | -0.335 | 1.819  | -0.565 | 0.109  | 0.767  | 0.021  |
| TCP1     | 0.154  | 44.812 | 0.893  | 0.420 | -0.087 | 41.103 | -0.220 | 4.906  | -0.168 | 6.001  |
| TDG      | 0.291  | 1.936  | 0.774  | 0.944 | 0.230  | 0.281  | 0.286  | 0.855  | 0.503  | 0.066  |
| Tdg      | -0.458 | 0.052  | -0.633 | 2.614 | -0.477 | 0.092  | -0.170 | 1.617  | -0.207 | 24.398 |
| TDP2     | -0.085 | 56.130 | 0.560  | 0.212 | -0.223 | 0.819  | -0.282 | 0.573  | 0.081  | 41.258 |
| TDRD5    | 0.045  | 53.690 | 0.183  | 4.122 | -0.251 | 26.120 | -0.301 | 27.828 | 0.579  | 0.601  |
| TEK      | -0.540 | 0.052  | -0.313 | 2.773 | 0.339  | 0.659  | -0.195 | 23.450 | -0.563 | 0.129  |
| TF       | -0.342 | 21.797 | -0.484 | 0.784 | 0.794  | 3.068  | 0.296  | 27.828 | 1.212  | 0.021  |
| TFAP4    | -0.283 | 1.098  | -0.680 | 2.859 | 0.151  | 22.899 | 0.300  | 23.450 | 0.515  | 0.213  |
| TFDP2    | -0.321 | 21.797 | 0.581  | 0.204 | -0.179 | 26.120 | 0.499  | 0.727  | 0.594  | 1.193  |
| TFRC     | 0.316  | 0.930  | 0.872  | 0.986 | -0.094 | 36.892 | 0.260  | 2.913  | -0.432 | 0.213  |
| TGFB1    | 0.267  | 7.743  | 0.190  | 5.829 | 0.472  | 1.556  | 0.486  | 1.210  | 0.882  | 0.021  |
| TGFBR1   | 0.106  | 25.771 | 0.105  | 8.881 | -0.504 | 0.240  | -0.089 | 32.497 | 0.374  | 0.166  |
| TGFBR2   | -0.061 | 54.154 | 0.460  | 3.205 | -0.141 | 36.892 | -0.463 | 0.573  | 0.601  | 0.021  |
| TGFBRAP1 | 0.269  | 9.997  | 0.614  | 0.514 | -0.124 | 54.331 | -1.288 | 0.061  | -0.443 | 0.021  |
| TGIF2    | -0.188 | 37.036 | -0.186 | 9.629 | 0.228  | 17.386 | 0.292  | 8.987  | 0.688  | 0.021  |
| TGM1     | 0.487  | 0.171  |        |       | 0.559  | 0.092  | -0.455 | 7.099  | 1.353  | 0.021  |
| TGM2     | -0.573 | 0.052  | -0.554 | 0.784 | 0.238  | 1.309  | 0.376  | 2.913  | 0.482  | 0.307  |
| Tgtp1    | -0.205 | 55.870 | 0.783  | 0.107 | -0.714 | 0.281  | 0.191  | 41.825 | 0.541  | 0.021  |
| TH       | -0.107 | 33.231 | -0.379 | 0.354 | -0.503 | 9.255  | 0.156  | 23.450 | 0.615  | 0.746  |
| THAP2    | -0.209 | 29.668 | 0.780  | 0.602 | -0.142 | 10.694 | 0.219  | 3.866  | 0.525  | 0.021  |
| THBD     | -0.082 | 51.013 | -0.538 | 0.309 | 0.328  | 12.575 | -0.063 | 47.420 | 0.220  | 31.624 |
| THBS2    | -0.271 | 1.431  | -1.038 | 0.773 |        |        |        |        | 0.289  | 24.398 |
| THBS4    | -0.152 | 29.668 | -0.196 | 2.859 | 0.424  | 0.819  | 0.164  | 41.825 | 0.226  | 31.624 |
| THOC2    | -0.189 | 1.098  | 0.222  | 4.122 | -0.309 | 0.856  | -0.396 | 0.855  | 0.454  | 0.993  |
| THPO     | -0.196 | 37.036 | -0.652 | 3.205 | 0.278  | 4.733  | -0.092 | 47.420 | 0.463  | 0.021  |
| THRAP3   | -0.148 | 49.540 | 0.591  | 0.445 | -0.498 | 0.092  | -0.866 | 1.332  | -0.222 | 14.822 |
| THRB     | -0.138 | 44.812 | -0.322 | 4.122 | -0.154 | 17.386 | -0.586 | 0.121  | -0.898 | 0.119  |
| THSD7B   | 0.064  | 52.218 | 0.906  | 0.944 | -0.167 | 4.053  | 0.106  | 47.420 | -0.396 | 0.891  |
| TIA1     | -0.107 | 51.013 | 0.712  | 0.595 | -0.218 | 1.819  | -0.293 | 0.109  | -0.402 | 0.269  |
| TIAM1    | -0.160 | 33.231 | 0.060  | 8.881 | 0.116  | 49.127 | -0.126 | 19.971 | -0.521 | 0.269  |
| TIAM2    | -0.684 | 0.052  | 0.274  | 0.784 | 0.090  | 54.331 | 0.132  | 41.825 | -0.900 | 0.993  |

|               |        |        |        |        |        |        |        |        |        |        |
|---------------|--------|--------|--------|--------|--------|--------|--------|--------|--------|--------|
| TICAM1        | 0.024  | 56.513 | 0.143  | 2.614  | 0.287  | 0.402  | 0.225  | 16.936 | 0.515  | 0.021  |
| TIFA          | 0.143  | 44.812 | -0.376 | 5.829  | -0.041 | 54.331 | -0.061 | 41.825 | 0.508  | 0.649  |
| TIMM17B       | -0.133 | 5.928  | 0.296  | 5.829  | 0.334  | 36.892 | 0.174  | 27.828 | -0.584 | 0.021  |
| TIMP1         | -0.318 | 12.647 | -0.296 | 3.009  | 0.350  | 0.724  | -0.363 | 8.987  | 1.332  | 0.021  |
| TIMP2         | -0.655 | 0.093  | 0.093  | 10.404 | 0.240  | 20.025 | 0.258  | 41.825 | 0.191  | 24.398 |
| TIMP4         | -0.366 | 0.398  | -0.375 | 0.569  | -0.177 | 8.121  | 0.204  | 2.415  | 0.042  | 43.175 |
| TIRAP         | 0.174  | 33.231 | -0.573 | 0.595  | 0.409  | 0.440  | -0.949 | 0.061  | -0.089 | 36.831 |
| TLE3          | 0.172  | 5.928  | -0.574 | 0.859  | 0.189  | 2.056  | 0.144  | 32.497 | 0.329  | 0.471  |
| TLE6          | 0.036  | 49.540 |        |        | 0.381  | 26.120 | -0.123 | 49.358 | -0.431 | 0.891  |
| TLN1          | 0.138  | 7.743  | -0.158 | 0.784  | 0.234  | 2.311  | 0.107  | 41.825 | 0.590  | 0.021  |
| TLR1          | 0.290  | 0.170  | 0.620  | 0.107  | 0.169  | 55.771 | -0.274 | 49.358 | 0.955  | 0.021  |
| TLR2          | -0.521 | 1.431  | 0.191  | 6.703  | 0.427  | 2.311  | 0.676  | 11.241 | 1.571  | 0.021  |
| TLR7          | -0.149 | 56.874 | 0.209  | 8.881  | 0.370  | 3.068  | 0.148  | 41.825 | 0.724  | 0.021  |
| TM4SF1        | -0.168 | 5.928  | 0.118  | 11.783 | 0.186  | 12.575 | 0.109  | 23.450 | 0.646  | 0.021  |
| TM4SF5        | 0.350  | 0.171  | 0.163  | 5.829  | -0.039 | 57.395 | 0.946  | 0.061  | -0.342 | 14.822 |
| TM6SF1        | 0.127  | 37.036 | 0.747  | 0.877  | 0.015  | 60.231 | -0.366 | 1.332  | -0.587 | 0.021  |
| TMBIM4        | 0.348  | 2.450  | 0.298  | 0.514  | 0.072  | 29.328 | -0.232 | 41.825 | 0.572  | 0.021  |
| TMC6          | 0.069  | 51.013 | -0.289 | 0.784  | 0.581  | 0.092  | -0.062 | 41.825 | 0.691  | 0.021  |
| TMCC3         | -0.325 | 0.052  | 0.062  | 11.783 | 0.332  | 0.641  | -0.270 | 1.332  | 0.718  | 0.021  |
| TMEM132D      | -0.284 | 37.036 | -0.560 | 0.457  |        |        |        |        | 0.182  | 35.531 |
| TMEM158       | 0.099  | 44.812 | 0.102  | 8.881  | -0.060 | 55.771 | 0.160  | 16.936 | 0.568  | 0.119  |
| TMEM163       | -0.213 | 18.587 | 0.510  | 1.457  | 0.193  | 29.328 | -0.069 | 49.358 | 0.889  | 0.021  |
| TMEM173       | -0.230 | 0.529  | -0.427 | 2.859  | 0.052  | 49.127 | 0.173  | 13.893 | 0.636  | 0.021  |
| TMEM176B      | -0.163 | 49.540 | 0.388  | 2.614  | 0.156  | 8.121  | 0.130  | 13.893 | 0.780  | 0.021  |
| TMEM189       |        |        |        |        | 0.338  | 2.311  | -0.374 | 23.450 | 0.695  | 0.021  |
| TMEM47        | -0.235 | 0.666  | -0.828 | 0.773  | -0.056 | 54.331 | 0.035  | 53.829 | 0.274  | 24.398 |
| TMEM51        | -0.061 | 53.690 | 0.263  | 0.602  | 0.527  | 1.819  | -0.218 | 54.403 | 0.703  | 0.021  |
| TMEM57        | 0.035  | 52.827 | 0.219  | 0.514  | 0.045  | 56.823 | 0.455  | 0.109  | 0.216  | 14.822 |
| TMEM63A       | 0.165  | 5.928  | -0.561 | 3.205  | 0.084  | 26.120 | 0.250  | 0.177  | -0.351 | 0.993  |
| TMEM86A       | -0.354 | 0.126  | -0.072 | 11.783 |        |        | 0.252  | 0.399  | 0.486  | 0.021  |
| tmf1          | 0.183  | 44.812 | 0.649  | 1.029  | 0.070  | 49.127 | -0.151 | 4.906  | -0.421 | 0.084  |
| TMLHE         | 0.211  | 18.587 | -0.392 | 5.829  | 0.179  | 26.120 | 0.125  | 41.825 | -0.386 | 0.084  |
| tmod1         | 0.399  | 0.171  | 0.440  | 0.445  | 0.158  | 33.124 | -0.292 | 1.617  | -0.584 | 0.021  |
| TMOD2         | -0.571 | 0.511  | 0.494  | 0.514  | -0.496 | 0.724  | 0.152  | 16.936 | -0.341 | 0.119  |
| TMPRSS6       | 0.279  | 21.797 | -0.165 | 3.205  | 0.360  | 0.659  |        |        | 0.796  | 0.021  |
| TMSB10/TMSB4X | 0.178  | 33.231 | 0.310  | 1.663  | 0.250  | 29.328 | -0.232 | 0.947  | 0.778  | 0.269  |
| TMTC1         | -0.207 | 0.511  | 0.763  | 1.457  | 0.188  | 10.694 | -0.289 | 4.906  | -0.497 | 0.021  |
| TMTC2         | 0.215  | 0.666  | 0.199  | 0.944  | 0.036  | 56.823 | 0.098  | 49.358 | -0.532 | 0.649  |
| TMX1          | -0.139 | 1.098  | 0.770  | 1.029  | 0.017  | 58.406 |        |        | -0.472 | 0.021  |
| TMX4          | -0.106 | 44.812 | 0.680  | 1.772  | 0.156  | 49.127 | 0.074  | 52.124 | -0.750 | 0.021  |
| TNFAIP2       | -0.063 | 44.812 | -0.621 | 1.772  | -0.038 | 58.406 | -0.025 | 54.831 | 0.408  | 0.021  |
| TNFAIP8L2     | -0.161 | 29.668 | 0.193  | 2.773  | 0.541  | 0.402  | -0.370 | 0.506  | 0.361  | 0.021  |
| TNFRSF21      | 0.234  | 0.398  | 0.531  | 0.877  | 0.035  | 56.823 | 0.076  | 47.420 | -0.608 | 0.649  |
| TNFRSF9       |        |        |        |        |        |        |        |        | 0.692  | 0.021  |
| TNIK          | -0.207 | 25.771 | 0.759  | 1.289  | -0.249 | 36.892 | -0.413 | 32.497 | -0.381 | 0.307  |
| TNKS          | -0.260 | 37.036 | 0.605  | 1.663  | -0.345 | 0.641  | 0.144  | 23.450 | -0.362 | 0.307  |
| TNNI2         | -0.156 | 33.231 | -0.290 | 2.614  | 0.369  | 1.309  | 0.077  | 50.493 | 0.610  | 0.039  |
| TNS1          | -0.365 | 0.052  | -0.354 | 3.205  | 0.424  | 0.724  | -0.969 | 0.353  | 0.654  | 0.066  |
| TNS3          | 0.233  | 15.278 | 0.680  | 0.204  | 0.127  | 49.127 | 0.221  | 16.936 | 0.340  | 6.001  |
| TNXB          | 0.224  | 37.036 | 0.459  | 0.986  | 0.949  | 0.092  | -0.230 | 47.420 | 0.638  | 0.649  |
| TOM1L2        | -0.346 | 0.262  | 0.430  | 0.445  | 0.633  | 0.092  | -0.285 | 0.292  | -0.494 | 0.213  |
| TOMM34        | 0.268  | 1.936  | 0.251  | 7.537  | 0.099  | 54.331 | 0.120  | 50.493 | -0.481 | 0.021  |
| TOMM70A       | -0.199 | 7.743  | 0.342  | 0.595  | -0.102 | 49.127 | 0.049  | 47.420 | -0.381 | 0.166  |
| TOR3A         | -0.126 | 52.827 | 0.558  | 0.267  | -0.119 | 26.120 | 0.270  | 41.825 | 0.607  | 0.021  |
| TP73          | 0.617  | 0.171  | 0.645  | 0.595  | -0.460 | 26.120 | 0.642  | 0.353  | 0.269  | 1.977  |
| TPD52L2       | 0.264  | 0.666  | 0.722  | 0.877  | 0.126  | 22.899 | 0.142  | 19.971 | -0.367 | 1.977  |
| TPM1          |        |        | 0.244  | 1.212  | 0.545  | 0.092  | -0.272 | 16.936 | -0.129 | 24.398 |
| TPMT          | -0.129 | 25.771 | 0.467  | 0.107  | -0.347 | 3.068  | -0.513 | 0.947  | 0.415  | 0.993  |
| TPP2          | 0.354  | 0.052  | 0.443  | 0.180  | -0.037 | 56.823 | 0.041  | 47.420 | -0.117 | 11.001 |
| TPPP          | -0.065 | 44.812 | 0.240  | 5.829  | -0.135 | 8.121  | -0.164 | 8.987  | -0.471 | 0.021  |
| TPPP3         |        |        | 0.282  | 5.829  | 0.043  | 57.395 | 0.062  | 53.272 | 0.594  | 0.119  |
| TRA2A         | -0.234 | 18.587 | 0.583  | 1.457  | 0.261  | 3.068  | -0.164 | 13.893 | -0.567 | 0.021  |
| TRAF3IP3      | 0.092  | 37.036 | 0.647  | 0.595  | 0.164  | 36.892 | 0.105  | 41.825 | -0.557 | 0.021  |
| TRAF4         | -0.319 | 29.668 | 0.357  | 0.514  | -0.127 | 54.331 | -0.771 | 0.341  | 1.228  | 0.021  |
| TRAF5         | 0.268  | 33.231 | 0.675  | 1.029  | 0.690  | 0.092  | -0.453 | 1.332  | 0.460  | 0.471  |
| TRAPPC8       | 0.299  | 0.262  | -0.142 | 3.205  | 0.124  | 41.103 | 0.162  | 41.825 | -0.367 | 0.039  |
| TRDMT1        | -0.118 | 37.036 | 0.199  | 12.522 | -0.131 | 14.770 | 0.463  | 0.250  |        |        |
| TREM2         | 0.194  | 3.157  | -0.681 | 0.569  | 0.042  | 56.823 | 0.115  | 47.420 | 1.283  | 0.021  |

|                 |        |        |        |        |        |        |        |        |        |        |
|-----------------|--------|--------|--------|--------|--------|--------|--------|--------|--------|--------|
| TREML1          | 0.061  | 44.812 |        |        | 0.223  | 0.659  | -0.862 | 0.061  | -0.331 | 11.001 |
| TRERF1          | -0.328 | 0.052  |        |        | 0.165  | 49.127 | 0.515  | 0.061  | 0.619  | 0.066  |
| TRHDE           | 0.214  | 18.587 | 0.547  | 2.773  | -0.239 | 0.856  | -0.177 | 4.906  | -0.467 | 0.021  |
| TRIB1           | 1.015  | 0.052  | 0.904  | 0.354  | 0.606  | 0.092  | -0.049 | 55.172 | -0.347 | 44.203 |
| TRIM25          | 0.068  | 49.540 | 0.645  | 0.784  | -0.182 | 9.255  | -0.056 | 47.420 | -0.474 | 0.119  |
| Trim30a/Trim30d |        |        | -0.254 | 2.614  | -0.663 | 0.092  | 0.457  | 19.971 | 0.674  | 0.649  |
| TRIM37          | -0.939 | 0.052  | 0.431  | 2.123  | -0.650 | 0.092  | -0.110 | 23.450 | -0.298 | 0.119  |
| TRIM68          | -0.059 | 51.013 | -0.148 | 8.253  | -0.158 | 4.053  | 0.560  | 0.061  | -0.792 | 0.021  |
| TRIM7           | 0.128  | 15.278 | 0.131  | 5.829  | 0.272  | 8.121  | 0.058  | 52.124 | 0.463  | 0.471  |
| TRIP13          | 0.198  | 5.928  | 0.448  | 1.534  | -0.158 | 55.771 | 0.153  | 47.420 | -0.667 | 0.021  |
| TRIP4           | 0.095  | 51.013 | -0.353 | 0.569  | 0.202  | 49.127 | 0.767  | 0.855  | -0.781 | 0.021  |
| TRIP6           | 0.031  | 55.170 | 0.266  | 1.457  | 0.227  | 0.641  | 0.783  | 0.061  | 0.438  | 0.021  |
| TRMT12          | -0.722 | 0.171  | -0.774 | 2.773  | -0.492 | 0.440  | -0.354 | 41.825 | -0.413 | 0.129  |
| TRMT1L          | 0.125  | 18.587 | 0.659  | 0.514  | 0.079  | 54.331 |        |        | -0.403 | 0.213  |
| TRMT6           | -0.533 | 0.052  | 0.270  | 11.093 | -0.513 | 0.092  | 0.145  | 23.450 | 0.892  | 0.993  |
| TROVE2          | 0.145  | 1.936  | -0.591 | 1.457  | -0.218 | 10.694 | -0.376 | 0.573  | -0.230 | 1.193  |
| TRPC2           | -0.322 | 3.157  | 0.756  | 0.514  | 0.668  | 1.309  | 1.166  | 0.061  | -0.384 | 0.649  |
| TRPC4           | -0.266 | 0.780  | -0.118 | 8.881  | 0.312  | 10.694 | 1.250  | 0.506  | -0.241 | 0.649  |
| TRPM3           | 0.017  | 57.293 | 0.217  | 1.534  | -0.293 | 1.098  | -0.646 | 0.061  | -0.853 | 0.119  |
| TRPS1           | -0.742 | 0.052  | 0.410  | 0.264  | -0.284 | 4.053  | 0.211  | 1.878  | -0.774 | 0.021  |
| TSC1            | -0.485 | 0.052  | 0.577  | 1.534  | 0.430  | 10.694 | -0.278 | 13.893 | -0.627 | 0.021  |
| TSC22D4         | -0.445 | 0.052  | 0.489  | 0.669  | 0.270  | 26.120 | 0.716  | 0.061  | 0.635  | 0.993  |
| TSHZ3           | 0.119  | 44.812 | -0.633 | 3.009  | -0.286 | 3.475  | -0.804 | 0.061  | -0.221 | 0.649  |
| TSN             | -0.357 | 0.171  | 0.456  | 0.420  | -0.611 | 0.440  | -0.397 | 0.061  | -0.555 | 24.398 |
| TSPAN15         |        |        | 0.573  | 0.569  | 0.276  | 1.819  | -0.193 | 19.971 | 0.612  | 0.213  |
| TSPAN18         | 0.050  | 49.540 | 0.094  | 8.253  | -0.157 | 49.127 | 0.789  | 0.061  | 0.989  | 0.021  |
| TSPAN2          | -0.031 | 55.870 | -0.352 | 4.122  |        |        | 0.366  | 0.061  | 0.644  | 0.307  |
| TSPAN4          |        |        |        |        | -0.079 | 49.127 |        |        | 0.522  | 0.391  |
| TSPAN9          | 0.222  | 0.666  | -0.136 | 6.703  | 0.334  | 0.402  | 0.046  | 53.272 | 0.485  | 0.129  |
| TSPEAR          | 0.099  | 29.668 | -0.806 | 0.309  | 0.280  | 0.856  |        |        | 0.306  | 0.307  |
| TSPO            | -0.449 | 18.587 | -0.354 | 5.829  | 0.231  | 0.517  | 0.538  | 0.727  | 0.944  | 0.021  |
| TTBK2           | 0.171  | 15.278 | 0.187  | 5.829  | -0.185 | 1.556  | -0.674 | 0.061  | -0.505 | 0.021  |
| TTC30B          | 0.216  | 5.928  | 0.510  | 1.534  | 0.080  | 36.892 | 0.112  | 49.358 | -0.381 | 0.021  |
| TTC38           | -0.191 | 51.013 | 0.158  | 8.881  | 0.134  | 41.103 | 0.944  | 0.061  | -0.375 | 31.624 |
| TTC7A           | -0.126 | 44.812 | -0.357 | 3.009  |        |        | 0.187  | 0.573  | 0.539  | 0.021  |
| TTC9C           | 0.298  | 0.511  | 0.686  | 1.772  | -0.170 | 10.694 | 0.150  | 11.241 | -0.478 | 0.269  |
| TTF1            | 0.438  | 9.997  | 0.311  | 2.773  | -0.374 | 0.659  | -0.079 | 47.420 | 0.217  | 31.624 |
| TTF2            | -0.237 | 37.036 | -0.310 | 0.784  | -0.214 | 33.124 | -1.229 | 0.061  | 0.333  | 6.001  |
| TTLL7           | 0.032  | 56.130 | 0.368  | 2.300  | 0.294  | 2.311  | 0.167  | 55.172 | -1.005 | 0.021  |
| TUBA1C          | -0.626 | 0.170  | 0.299  | 0.484  | 0.096  | 26.120 | 0.448  | 0.061  | 1.100  | 0.021  |
| TUBB2B          | -0.105 | 33.231 | -0.285 | 5.829  | 0.056  | 49.127 | -0.067 | 41.825 | 0.428  | 0.021  |
| TUBB6           | 0.354  | 0.093  | -0.291 | 4.122  | 0.269  | 33.124 | 0.568  | 0.399  | 0.739  | 0.129  |
| TUBGCP4         | 0.129  | 7.743  | 0.786  | 1.029  | 0.099  | 36.892 | -0.464 | 5.543  | -0.696 | 0.021  |
| TULP1           | 0.139  | 15.278 | -0.669 | 0.944  |        |        | 0.045  | 52.656 | 0.128  | 31.624 |
| TUSC3           | 0.082  | 44.812 | 0.633  | 1.289  | -0.081 | 49.127 |        |        | -0.433 | 0.166  |
| TWF1            | -0.556 | 2.450  | 0.520  | 2.614  | -0.561 | 0.092  | 0.409  | 0.353  | -0.623 | 0.307  |
| TWIST2          | -0.228 | 3.157  | -0.144 | 5.829  | -0.813 | 3.068  | 0.575  | 0.061  | -0.612 | 0.947  |
| TXNDC9          | -0.464 | 0.780  | -0.369 | 4.122  | 0.334  | 1.556  | 0.120  | 27.828 | 0.053  | 43.745 |
| TXNRD2          | -0.084 | 49.540 | 0.102  | 6.703  | 0.057  | 49.127 | -0.482 | 0.109  | 0.048  | 40.660 |
| TYMS            | -0.218 | 0.511  | 0.453  | 0.514  | -0.480 | 4.733  | 0.222  | 41.825 | 0.143  | 42.369 |
| TYRO3           | 0.287  | 18.587 | 0.298  | 5.829  | 0.416  | 0.092  | -0.176 | 13.893 | 0.064  | 43.175 |
| TYROBP          | -0.214 | 44.812 |        |        | 0.093  | 54.331 | 0.113  | 23.450 | 0.934  | 0.021  |
| U2AF1           | 0.203  | 33.231 | -0.622 | 0.663  | 0.126  | 3.068  | 0.176  | 27.828 | -0.153 | 11.001 |
| U2af2           | 0.071  | 54.701 | -0.161 | 10.404 | 0.264  | 2.311  | -1.260 | 0.061  | -0.373 | 0.993  |
| UBA5            | 0.341  | 33.231 | 0.496  | 0.514  | -0.554 | 0.281  | -0.751 | 0.109  | -0.183 | 2.886  |
| UBAP2L          | -0.637 | 0.052  | 0.608  | 0.107  | -0.746 | 0.092  | -0.476 | 2.913  | -1.192 | 0.021  |
| UBE2D1          | 0.417  | 0.511  | 0.474  | 2.123  | 0.222  | 0.724  | -0.254 | 5.543  | -0.320 | 0.746  |
| UBE2D2          | 0.059  | 49.540 | 0.703  | 0.595  | -0.085 | 36.892 | 0.144  | 47.420 | -0.479 | 0.307  |
| UBE2E1          | 0.117  | 44.812 | 0.650  | 0.595  | -0.179 | 8.121  | -0.051 | 49.358 | -0.460 | 0.021  |
| UBE2E2          | -0.040 | 57.367 | -0.389 | 3.205  | 0.151  | 36.892 | 0.128  | 4.906  | 0.505  | 0.039  |
| UBE2I           | -0.372 | 0.780  | 0.319  | 4.122  | 0.105  | 41.103 | -0.253 | 8.987  | -0.490 | 0.993  |
| UBE2J2          | 0.159  | 21.797 | 0.605  | 0.514  | 0.034  | 56.823 | 0.098  | 41.825 | -0.182 | 2.886  |
| UBE2N           | 0.157  | 21.797 | 0.550  | 0.180  | -0.092 | 41.103 | -0.464 | 0.130  | -0.899 | 0.021  |
| UBE2T           | 0.267  | 1.098  | -0.294 | 3.009  | -0.149 | 17.386 | 0.553  | 0.061  | -0.057 | 35.531 |
| UBE2V2          | 0.184  | 37.036 | -0.408 | 0.595  | -0.109 | 29.328 | -0.145 | 2.913  | -0.380 | 0.021  |
| UBE2W           | 0.220  | 49.540 | 0.583  | 0.602  | -0.111 | 22.899 | 0.258  | 47.420 | -0.528 | 0.021  |
| UBE3A           | -0.195 | 25.771 | 0.929  | 1.029  | -0.203 | 26.120 | 0.142  | 1.617  | -0.448 | 0.021  |
| UBR2            | 0.164  | 18.587 | 0.249  | 0.514  | -0.203 | 0.724  | 0.445  | 0.061  | 0.234  | 38.751 |

|         |        |        |        |        |        |        |        |        |        |        |
|---------|--------|--------|--------|--------|--------|--------|--------|--------|--------|--------|
| UBR3    | -0.481 | 0.052  | -0.212 | 0.784  | -0.716 | 0.402  | 0.110  | 41.825 | 0.206  | 24.398 |
| UCLH3   | 0.132  | 44.812 | 0.613  | 0.264  | -0.085 | 41.103 |        |        | -0.063 | 38.751 |
| UCP2    | 0.095  | 49.540 | -0.273 | 0.602  | 0.021  | 58.406 | -0.348 | 5.543  | 0.841  | 0.021  |
| UGT2B10 | -0.425 | 0.052  | 0.163  | 8.253  | -0.600 | 2.659  | 0.977  | 0.109  | 1.541  | 0.021  |
| UMPS    | 0.179  | 0.529  | 0.526  | 0.595  | 0.077  | 41.103 | 0.181  | 23.450 | -0.172 | 24.398 |
| UNC45B  | 0.036  | 51.013 | -0.401 | 4.122  | 0.494  | 0.517  | -0.226 | 13.893 | -0.363 | 24.398 |
| UNC93B1 | -0.071 | 56.765 | -0.306 | 3.205  | 0.081  | 41.103 | -0.167 | 49.358 | 0.791  | 0.021  |
| UPF2    | 0.537  | 29.668 | -1.104 | 2.614  | -0.397 | 0.092  | -0.034 | 53.272 | -0.329 | 14.822 |
| UPF3B   | -0.128 | 18.587 | 0.786  | 0.595  | -0.207 | 1.556  | 0.467  | 0.506  | -0.313 | 0.891  |
| UQCRQ   | -0.372 | 0.171  | 0.241  | 4.122  | -0.171 | 5.705  |        |        | 0.217  | 39.468 |
| USH1C   | 0.032  | 51.013 | -0.403 | 0.205  | 0.011  | 60.231 | 0.088  | 41.825 | 0.198  | 8.002  |
| USO1    | -0.081 | 51.013 | 0.481  | 1.086  | -0.053 | 57.395 | 0.259  | 32.497 | -0.366 | 0.166  |
| USP13   | 0.247  | 4.284  | 0.393  | 3.205  | 0.234  | 6.932  | -0.044 | 47.420 | -0.370 | 0.021  |
| USP15   | -0.903 | 0.052  | 0.553  | 1.663  | -0.573 | 0.092  | -1.159 | 0.061  | 0.803  | 0.993  |
| USP25   | 0.183  | 33.231 | 0.647  | 0.595  | 0.119  | 6.932  | -0.269 | 3.866  | -0.175 | 0.746  |
| USP32   | -0.125 | 1.936  | -0.358 | 4.122  | 0.058  | 49.127 | -0.054 | 47.420 | -0.459 | 0.021  |
| USP33   | 0.105  | 44.812 | 0.532  | 1.457  | -0.091 | 33.124 | 0.077  | 51.354 | -0.435 | 0.021  |
| USP36   | -0.473 | 0.052  | 0.134  | 7.537  | -0.407 | 0.092  | 0.640  | 19.971 | -0.377 | 0.993  |
| USP39   | -0.108 | 52.218 | 0.811  | 0.595  | -0.110 | 29.328 | 0.258  | 32.497 | -0.375 | 0.021  |
| USP45   | -0.112 | 44.812 |        |        | -0.125 | 49.127 | -0.170 | 47.420 | -0.494 | 0.649  |
| USP46   | -0.323 | 29.668 | 0.466  | 0.784  | 0.218  | 8.121  | 0.167  | 41.825 | -0.541 | 0.021  |
| USP47   | -1.080 | 0.052  | 0.259  | 5.829  | -0.533 | 1.309  | 0.695  | 0.399  | -0.406 | 0.166  |
| USP53   | -0.984 | 1.098  | 0.561  | 0.180  | 0.076  | 41.103 | 0.113  | 41.825 | 0.416  | 0.307  |
| UST     | -0.045 | 52.218 | -0.430 | 3.205  | -0.213 | 8.121  | -0.393 | 0.292  | 0.089  | 37.824 |
| UTP18   | 0.208  | 29.668 | -0.363 | 4.122  | 0.293  | 14.770 | -0.574 | 0.250  | 0.129  | 33.879 |
| UTP23   | -0.205 | 7.743  | 0.817  | 0.107  | -0.216 | 26.120 | 0.381  | 41.825 | -0.869 | 0.021  |
| VAMP7   | 0.019  | 54.701 |        |        | -0.294 | 3.475  | -0.287 | 0.573  | -0.386 | 0.471  |
| VAMP8   | 0.233  | 0.324  | 0.324  | 1.772  | -0.079 | 55.771 | -0.116 | 8.987  | 0.520  | 0.045  |
| VANGL1  | -0.576 | 0.262  | -0.130 | 3.205  | 0.312  | 5.705  | -0.168 | 11.241 | 0.402  | 0.993  |
| VANGL2  | -0.723 | 0.780  | -1.035 | 1.029  | 0.366  | 0.281  | -0.559 | 19.971 | 0.490  | 0.746  |
| VAPB    | -0.494 | 0.052  | 0.411  | 0.174  | 0.065  | 49.127 | 0.337  | 8.987  | 0.241  | 8.002  |
| VARS2   | 0.101  | 33.231 | 0.249  | 0.986  | -0.036 | 60.231 | 0.475  | 0.061  | 0.074  | 40.660 |
| VAT1L   | -0.241 | 33.231 | 0.249  | 5.829  | 0.322  | 0.092  | -0.053 | 52.124 | 0.533  | 0.021  |
| VAV1    | 0.486  | 2.450  | -0.529 | 2.300  | 0.370  | 22.899 | 0.525  | 41.825 | 1.269  | 0.021  |
| VCAM1   | -0.184 | 1.431  | -0.329 | 4.122  | 0.261  | 1.309  | 0.413  | 0.947  | 0.434  | 0.213  |
| VCL     | 0.155  | 25.771 | 0.537  | 0.830  | 0.210  | 0.724  | -0.174 | 0.573  | 0.348  | 0.993  |
| VEGFA   | 0.229  | 0.262  | -0.190 | 7.537  | 0.666  | 0.092  | -0.767 | 5.543  | -0.677 | 0.084  |
| VEGFB   | -0.058 | 53.690 | -0.439 | 0.164  | 0.119  | 6.932  | 0.186  | 3.866  | 0.288  | 1.977  |
| VIM     | -0.392 | 0.052  | 0.638  | 0.445  | 0.198  | 0.856  | 0.298  | 1.332  | 1.573  | 0.021  |
| VPS13A  | 0.164  | 0.930  | 0.521  | 0.595  | -0.081 | 54.331 | 0.245  | 2.913  | -0.525 | 0.066  |
| VPS24   | 0.128  | 25.771 | 0.596  | 0.514  | 0.131  | 49.127 | 0.177  | 47.420 | -0.112 | 37.824 |
| VPS35   | -0.424 | 0.171  | 0.232  | 2.614  | -0.432 | 4.733  | 0.078  | 49.358 | -0.353 | 0.021  |
| VPS36   | -0.443 | 44.812 | 0.611  | 0.180  | -0.065 | 56.823 | -0.468 | 0.250  | -0.029 | 39.468 |
| VSNL1   | 0.164  | 44.812 | 0.539  | 0.174  | -0.076 | 41.103 | -0.070 | 23.450 | -0.547 | 0.045  |
| VSX2    | -0.301 | 33.231 | 0.196  | 8.253  | 0.069  | 58.406 | -0.168 | 41.825 | 0.483  | 0.977  |
| VTA1    | 0.027  | 55.170 | -0.361 | 3.205  | 0.075  | 55.771 | 0.062  | 41.825 | 0.753  | 0.129  |
| VT11A   | 0.461  | 0.093  | 0.621  | 0.669  | 0.301  | 1.556  | -0.360 | 49.358 | -0.553 | 0.746  |
| VWA3B   | -0.098 | 49.540 | -0.142 | 9.629  | 0.226  | 8.121  | 0.518  | 11.241 | 0.563  | 0.021  |
| VWF     | -0.827 | 0.052  | 0.829  | 0.300  | 0.181  | 10.694 | -0.259 | 23.450 | 0.558  | 0.021  |
| WAPAL   | 0.215  | 0.666  | 0.636  | 2.300  | -0.076 | 41.103 | 0.128  | 41.825 | -0.664 | 0.021  |
| WARS2   | -0.559 | 0.262  | 0.615  | 0.669  | 0.369  | 1.556  | 0.759  | 1.878  | 0.441  | 24.398 |
| WASF2   | 0.075  | 51.013 | 0.304  | 0.440  | 0.298  | 8.881  | 0.180  | 19.971 | 0.638  | 0.021  |
| WASF3   | -0.127 | 55.559 | -0.424 | 0.669  | -0.043 | 58.611 | -0.048 | 49.358 | -0.191 | 4.218  |
| WBP4    | 0.024  | 55.870 | 0.977  | 0.264  | 0.043  | 54.331 | 0.075  | 41.825 | -0.578 | 0.021  |
| WBSCR17 | -0.133 | 49.540 | 0.477  | 0.986  | 0.491  | 2.056  | -0.847 | 0.947  | 0.476  | 0.993  |
| WDFY3   | -0.503 | 15.278 | -0.112 | 6.703  | 0.856  | 0.092  | -0.168 | 1.617  | 0.550  | 0.021  |
| WDR11   | -0.856 | 0.052  | 0.411  | 5.829  | -0.446 | 0.092  | -0.304 | 47.420 | -0.540 | 0.021  |
| WDR12   | -0.204 | 25.771 | 0.648  | 0.514  | -0.810 | 0.092  | -0.536 | 0.947  | -0.377 | 4.218  |
| WDR20   | 0.284  | 4.284  | 0.953  | 0.267  | -0.223 | 2.659  | -0.137 | 11.241 | -0.425 | 0.021  |
| WDR33   | 0.198  | 44.812 | 0.526  | 0.514  | -0.106 | 41.103 | 0.228  | 27.828 | -0.305 | 11.001 |
| WDR37   | 0.134  | 44.812 | 1.092  | 0.986  | 0.169  | 41.103 | -0.747 | 7.099  | -0.617 | 0.021  |
| WDR59   | 0.449  | 0.052  | 0.416  | 0.669  | 0.050  | 54.331 | 0.269  | 0.130  | -0.713 | 0.084  |
| WDR70   | -0.111 | 18.587 | -0.135 | 10.404 | -0.182 | 4.733  | -0.232 | 27.828 | -0.475 | 0.891  |
| WDR77   | 0.390  | 0.171  | 0.633  | 1.663  | 0.230  | 4.053  | -0.518 | 0.061  | -0.575 | 0.891  |
| WFD5    | -0.139 | 51.013 |        |        | -0.482 | 8.121  | 0.522  | 0.573  | 0.449  | 0.891  |
| WHSC1   | 0.283  | 0.171  | 0.584  | 0.669  | 0.151  | 2.056  | 0.247  | 2.913  | 0.559  | 1.193  |
| WHSC1L1 | 0.383  | 0.511  | 0.273  | 1.086  | 0.301  | 0.240  | -0.579 | 0.061  | -0.663 | 0.021  |
| WIF1    | -0.779 | 0.052  | -0.170 | 6.703  | -0.288 | 9.255  | 0.478  | 0.855  | -0.081 | 38.751 |

|               |        |        |        |        |        |        |        |        |        |        |
|---------------|--------|--------|--------|--------|--------|--------|--------|--------|--------|--------|
| WISP1         | -0.299 | 4.284  | 0.129  | 13.299 | 0.292  | 29.328 | -0.749 | 0.061  | -0.682 | 24.398 |
| WISP2         | -0.253 | 5.928  | -0.110 | 3.205  | 0.286  | 0.281  | 0.233  | 2.415  | 1.003  | 0.021  |
| WNK1          | 0.126  | 44.812 | -0.492 | 0.986  | -0.315 | 1.098  | #####  | 50.002 | -0.964 | 0.021  |
| WNT3A         | 0.498  | 18.587 | 0.837  | 0.107  | 0.244  | 26.120 | 0.333  | 0.506  | -0.056 | 37.824 |
| WNT4          | 0.056  | 55.170 | 0.347  | 5.829  | 0.284  | 2.056  | 0.456  | 0.947  | -0.264 | 24.621 |
| WRN           | 0.524  | 0.511  | 0.376  | 0.569  | -0.246 | 4.733  | 0.741  | 27.828 | 0.460  | 0.021  |
| WSCD2         | 0.102  | 33.231 | 0.053  | 8.881  | 0.017  | 58.611 | 0.134  | 41.825 | 0.618  | 0.601  |
| WWOX          | -0.445 | 0.052  | 0.376  | 0.602  | 0.210  | 3.068  | 0.204  | 13.893 | -0.554 | 0.307  |
| WWP1          | 0.266  | 15.278 | 0.561  | 1.663  | 0.162  | 4.733  | -0.680 | 1.878  | 0.731  | 0.021  |
| XDH           | -0.569 | 0.262  | -0.566 | 1.029  | -0.222 | 26.120 | -0.180 | 47.420 | 0.393  | 36.831 |
| XRCC2         | 0.229  | 0.398  | -0.570 | 0.944  |        |        | -0.837 | 0.947  | 0.117  | 31.624 |
| XRN1          | 0.148  | 25.771 | 0.213  | 0.514  | -0.034 | 60.231 | 0.264  | 41.825 | -0.375 | 0.993  |
| YARS2         | 0.130  | 33.231 | 0.727  | 0.595  | -0.058 | 57.395 | -0.581 | 0.061  | -0.500 | 0.021  |
| YEATS2        | -0.049 | 44.812 | -0.052 | 13.299 | 0.075  | 41.103 | 0.231  | 7.099  | 0.423  | 0.391  |
| YLPM1         | -0.202 | 18.587 | 0.541  | 0.420  | -0.961 | 0.092  | -0.722 | 1.878  | -0.557 | 0.166  |
| YTHDC2        | 0.035  | 54.701 | 0.793  | 0.877  | 0.017  | 59.793 | 0.267  | 0.573  | -0.297 | 6.001  |
| YWHAG         | 0.070  | 49.540 | 0.898  | 0.267  |        |        | -0.049 | 50.493 | -0.434 | 0.021  |
| Ywhaq         | -0.384 | 0.052  | 0.636  | 0.514  | -0.361 | 0.856  | 0.072  | 47.420 | -0.215 | 2.886  |
| YY1           | 0.328  | 37.036 | 0.795  | 1.534  | -0.123 | 6.932  | -0.503 | 8.987  | 0.434  | 0.649  |
| ZAP70         | -0.096 | 33.231 | 0.456  | 0.174  | 0.131  | 36.892 | -0.216 | 1.878  | 0.436  | 0.891  |
| ZBTB10        | 0.504  | 0.511  | 0.622  | 0.514  | 0.367  | 0.724  | 0.941  | 0.061  | 0.300  | 1.977  |
| ZBTB12        | -0.292 | 0.126  | -0.370 | 0.514  | -0.375 | 0.659  | -0.294 | 0.727  | 0.931  | 0.021  |
| ZBTB20        | -0.125 | 44.812 | 0.451  | 1.772  | -0.541 | 0.092  | -0.226 | 4.906  | -0.387 | 0.391  |
| ZBTB43        | 0.112  | 15.278 | 0.438  | 0.107  | 0.080  | 54.331 | 0.165  | 11.241 | 0.098  | 38.751 |
| ZBTB5         | -0.087 | 44.812 | -0.254 | 2.123  | -0.302 | 0.641  | -0.665 | 0.573  | -0.620 | 0.021  |
| ZBTB7A        | 0.238  | 12.647 | 0.125  | 10.404 | 0.231  | 20.025 | 0.250  | 3.866  | 0.617  | 0.021  |
| ZC3H12C       | 0.525  | 0.052  | -0.106 | 6.703  | 0.423  | 5.705  | -0.602 | 1.878  | 1.026  | 0.021  |
| ZCCHC11       | -0.510 | 0.052  | -0.360 | 4.122  | -0.214 | 9.255  | -0.242 | 23.450 | -0.995 | 0.021  |
| ZCCHC7        | -0.421 | 0.093  | 0.698  | 2.300  | -0.348 | 0.092  | 0.152  | 41.825 | 0.298  | 14.822 |
| ZCCHC8        | 0.024  | 54.154 | -0.349 | 0.784  | 0.056  | 58.406 | -1.133 | 0.061  | 0.215  | 0.471  |
| ZDHHC21       | 0.093  | 44.812 | 0.679  | 1.457  | -0.210 | 1.098  | -0.429 | 8.987  | -0.703 | 0.119  |
| ZEB2          | -0.303 | 0.262  | 0.452  | 0.289  | -0.374 | 29.328 | -0.597 | 0.061  | 0.182  | 36.831 |
| ZFC3H1        | 0.182  | 49.540 | 0.356  | 2.300  | -0.088 | 41.103 | 0.668  | 0.177  | 0.172  | 8.002  |
| ZFHX3         | -0.915 | 0.171  | 0.769  | 0.174  | -0.231 | 29.328 |        |        | 1.029  | 0.021  |
| Zfp386        | 0.436  | 0.780  | 0.973  | 0.107  | -0.429 | 0.440  | -0.538 | 1.332  | -1.625 | 0.021  |
| ZFP91         | -0.747 | 0.093  | 0.714  | 1.212  | -0.332 | 4.733  | -0.684 | 0.130  | 1.053  | 0.021  |
| ZFPM1         | 0.183  | 2.450  |        |        | 0.251  | 8.121  | 0.067  | 49.358 | 0.597  | 0.269  |
| ZFR           | 0.319  | 1.098  | 0.504  | 0.300  | -0.346 | 0.724  | -0.579 | 0.353  | -0.265 | 24.398 |
| ZFYVE26       | -0.378 | 0.052  | -0.606 | 0.784  | -0.429 | 0.281  | 1.172  | 0.061  | 0.287  | 0.391  |
| ZIC1          | -1.544 | 0.052  | 0.386  | 2.773  | -0.573 | 0.092  | -0.335 | 32.497 | 0.403  | 31.624 |
| ZKSCAN1       | -0.432 | 0.052  | 0.732  | 0.602  | 0.041  | 56.823 | 0.274  | 2.913  | 0.071  | 40.660 |
| ZKSCAN2       | -0.078 | 33.231 | -0.910 | 0.428  | -0.063 | 49.127 |        |        | 0.424  | 0.977  |
| ZKSCAN5       | 0.083  | 49.540 | 0.452  | 2.300  | 0.097  | 41.103 | -0.371 | 0.947  | -0.325 | 0.269  |
| ZMAT1         | -0.463 | 0.052  | 0.322  | 8.253  | -0.403 | 0.092  | 0.220  | 1.617  | -0.480 | 0.021  |
| ZMYM2         | 0.192  | 7.743  | 0.568  | 0.484  | -0.160 | 3.475  | -0.205 | 13.893 | 0.349  | 0.891  |
| ZNF169        | -0.684 | 0.052  |        |        | -0.242 | 6.932  |        |        | -0.738 | 0.213  |
| ZNF175        | 0.505  | 0.052  | 0.487  | 2.123  | 0.105  | 55.771 | -0.737 | 1.878  | -0.739 | 0.021  |
| ZNF202        | 0.254  | 0.171  | -0.284 | 4.122  | 0.168  | 2.056  | -0.376 | 0.947  | -0.258 | 11.001 |
| ZNF205        | 0.135  | 44.812 | 0.663  | 0.893  | 0.089  | 29.328 | -0.161 | 23.450 | -0.215 | 8.002  |
| ZNF276        | 0.245  | 0.511  | -0.321 | 4.122  | -0.119 | 54.331 | -0.556 | 0.341  | -0.298 | 6.001  |
| ZNF317        | -0.064 | 55.559 | 0.674  | 0.514  | -0.148 | 6.932  | 0.638  | 0.061  | -0.363 | 0.746  |
| ZNF385B       | 0.420  | 12.647 | -0.132 | 13.299 | 0.429  | 4.733  | -0.123 | 32.497 | 1.182  | 0.213  |
| ZNF440/ZNF808 | 0.529  | 5.928  | 0.168  | 5.829  | 0.641  | 0.092  | 0.459  | 19.971 | -0.146 | 24.398 |
| ZNF451        | -0.212 | 0.529  | 0.705  | 0.514  | 0.494  | 3.068  | 0.400  | 0.341  | -0.386 | 0.039  |
| ZNF469        | -0.281 | 0.052  | -0.696 | 0.944  | -0.114 | 29.328 | 0.350  | 8.987  | 0.135  | 31.624 |
| ZNF536        | 0.389  | 0.052  | -0.579 | 1.534  | -0.164 | 9.255  | 0.116  | 47.420 | 0.441  | 0.307  |
| ZNF593        | -0.157 | 15.278 | -0.310 | 4.122  | 0.096  | 49.127 | -0.618 | 0.061  | 0.225  | 1.193  |
| ZNF642        | -0.148 | 33.231 | 0.586  | 0.784  |        |        | 0.223  | 2.913  | 0.818  | 0.021  |
| ZNF652        | 0.109  | 21.797 | 0.399  | 0.164  | 0.224  | 9.255  | -0.705 | 16.936 | -0.038 | 40.660 |
| ZNF667        | 0.025  | 53.690 | 0.586  | 1.212  | -0.042 | 58.928 | -0.144 | 19.971 | -0.486 | 0.066  |
| ZNF668        | -0.783 | 0.052  | -0.422 | 0.877  | -0.873 | 0.641  | -1.206 | 0.061  | 0.637  | 0.021  |
| ZNFX1         | 0.356  | 0.780  | -0.384 | 2.859  | -0.150 | 26.120 | 0.397  | 27.828 | -0.480 | 0.391  |
| ZNHIT6        | -0.096 | 51.013 | 0.533  | 0.784  | 0.088  | 41.103 | 0.336  | 11.241 | -0.389 | 0.039  |
| ZNRF3         | 0.313  | 5.928  | 0.423  | 0.180  | 0.279  | 9.255  |        |        | -0.115 | 33.879 |
| ZWILCH        | 0.122  | 44.812 | -0.489 | 1.663  | -0.317 | 2.659  | -0.496 | 0.341  | -0.122 | 31.624 |
| ZWINT         | 0.193  | 4.284  | 0.502  | 0.174  |        |        | 0.327  | 23.450 | 0.275  | 0.213  |
