# Supplementary material for: Early Mechanisms of Pathobiology Are Revealed by Transcriptional Temporal Dynamics in Hippocampal CA1 Neurons of Prion Infected Mice
Source: PubMed Central journal article supplement (PMC3493483; doi:10.1371/journal.ppat.1003002), 2012-11-08
Supplement: ppat.1003002.s010.pdf [file ppat.1003002.s010.pdf]

|                    | 70           | 70           | 90            | 90            | 110           | 110           | 130          | 130          | EP           | EP           |
|--------------------|--------------|--------------|---------------|---------------|---------------|---------------|--------------|--------------|--------------|--------------|
| let-7b-5p          | 1.15         | -1.29        | 0.97          | -3.97         | 0.00          | 0.00          | -9.48        | -6.30        | -5.42        | -5.70        |
| let-7c-5p          | 1.73         | 1.32         | -1.75         | -3.65         | -2.37         | -2.66         | -1.70        | -2.23        | -1.57        | 1.01         |
| let-7d-5p          | -1.53        | -1.88        | 1.21          | -1.23         | -6.54         | -4.40         | -1.39        | -4.69        | -1.12        | 1.08         |
| <b>let-7e-5p</b>   | <b>-1.61</b> | <b>-2.07</b> | <b>4.68</b>   | <b>1.02</b>   | <b>-64.66</b> | <b>-26.97</b> | <b>3.24</b>  | <b>-1.29</b> | <b>-1.83</b> | <b>-1.69</b> |
| let-7g-5p          | 0.00         | 0.00         | 0.00          | 0.00          | 13.08         | 11.11         | 4.44         | 0.00         | -7.20        | -8.97        |
| miR-100-5p         | 2.01         | 2.92         | -2.76         | -7.57         | -5.21         | -2.73         | 2.26         | -1.50        | -2.25        | -1.11        |
| miR-101a-3p        | 2.03         | -4.52        | -2.06         | -3.75         | -3.24         | -7.77         | 2.41         | 1.58         | -3.15        | -3.52        |
| miR-101b-3p        | 0.00         | 0.00         | -1.38         | -3.76         | -2.20         | 1.12          | -15.69       | -37.65       | -5.42        | -1.39        |
| miR-125a-5p        | 2.37         | 2.52         | -1.67         | -1.56         | -1.03         | 1.70          | 2.72         | 2.06         | 1.15         | -1.02        |
| miR-125b-5p        | 4.47         | 2.13         | -2.37         | -5.32         | -1.31         | -4.33         | 1.66         | -1.02        | 1.15         | 2.27         |
| <b>miR-126-3p</b>  | <b>1.21</b>  | <b>1.34</b>  | <b>-1.22</b>  | <b>-1.92</b>  | <b>-2.62</b>  | <b>-1.10</b>  | <b>1.60</b>  | <b>-1.40</b> | <b>-1.17</b> | <b>1.77</b>  |
| miR-127-3p         | 1.58         | -1.15        | -1.07         | -2.64         | -2.48         | -4.25         | 1.78         | 1.10         | 1.08         | 1.73         |
| <b>miR-128a-3p</b> | <b>-1.50</b> | <b>-1.31</b> | <b>-3.55</b>  | <b>-10.57</b> | <b>-4.55</b>  | <b>-6.43</b>  | <b>-1.44</b> | <b>-2.85</b> | <b>-1.30</b> | <b>1.09</b>  |
| miR-129-3p         | 1.79         | -1.13        | -1.16         | -3.66         | -5.78         | -3.24         | -1.23        | -1.92        | -1.66        | -1.01        |
| <b>miR-132-3p</b>  | <b>4.13</b>  | <b>6.12</b>  | <b>-1.54</b>  | <b>-3.69</b>  | <b>-1.20</b>  | <b>1.33</b>   | <b>4.57</b>  | <b>1.40</b>  | <b>-1.07</b> | <b>3.16</b>  |
| miR-133a-3p        | 0.00         | 0.00         | 2.27          | -1.70         | -4.98         | -1.85         | -5.18        | -5.20        | -1.12        | -1.45        |
| miR-135a-1-3p      | 4.13         | 1.87         | 1.59          | -2.74         | -15.82        | -1.08         | -1.50        | 1.51         | -6.37        | 1.03         |
| miR-136-5p         | 2.15         | 1.47         | 1.21          | -1.34         | -2.62         | 1.82          | -1.44        | -2.52        | -2.17        | -1.81        |
| miR-137-3p         | 2.57         | 2.02         | -4.71         | -5.32         | -2.64         | -4.92         | -1.47        | -1.24        | -2.12        | -1.64        |
| miR-138-1-3p       | -2.33        | -4.03        | -1.37         | -4.79         | -4.78         | -4.25         | -7.18        | -6.49        | -5.19        | -1.93        |
| miR-138-5p         | 2.38         | 1.67         | -1.23         | -1.86         | -3.51         | -3.18         | -1.26        | -2.15        | -1.67        | 1.10         |
| miR-139-5p         | 1.48         | 1.35         | -2.43         | -3.24         | -2.50         | -2.27         | 2.29         | 1.05         | -1.07        | 1.41         |
| <b>miR-140-5p</b>  | <b>3.25</b>  | <b>2.21</b>  | <b>0.00</b>   | <b>0.00</b>   | <b>-10.85</b> | <b>-2.77</b>  | <b>-1.19</b> | <b>-2.47</b> | <b>-1.06</b> | <b>-1.34</b> |
| miR-145-5p         | 5.71         | 1.53         | -1.70         | -3.12         | -3.74         | -1.46         | 1.02         | 1.68         | 1.18         | 2.52         |
| miR-146a-5p        | 5.24         | 1.63         | 2.54          | -1.85         | 12.87         | 13.07         | -1.49        | -7.58        | 4.12         | 3.18         |
| miR-146b-5p        | 2.36         | 1.93         | 1.39          | -1.89         | -2.58         | -1.13         | 1.57         | -1.37        | 1.36         | 4.07         |
| miR-150-5p         | 3.07         | 2.31         | -2.49         | -3.72         | -1.72         | 1.28          | -1.25        | -1.52        | 2.08         | 2.43         |
| <b>miR-16-5p</b>   | <b>4.87</b>  | <b>2.79</b>  | <b>1.20</b>   | <b>-1.89</b>  | <b>0.00</b>   | <b>0.00</b>   | <b>1.68</b>  | <b>-1.63</b> | <b>-2.38</b> | <b>-2.14</b> |
| miR-181a-5p        | 2.37         | -1.44        | -2.44         | -2.34         | 0.00          | 0.00          | 1.70         | -2.17        | -1.71        | -1.62        |
| miR-186-5p         | 2.02         | 2.25         | -1.18         | -2.61         | -3.12         | 1.32          | 2.41         | 0.00         | 0.00         | 0.00         |
| miR-191-5p         | 2.16         | 2.18         | -1.72         | -3.07         | -1.68         | -1.58         | 2.43         | 1.11         | -1.25        | 1.21         |
| miR-193b-3p        | 3.41         | 4.28         | -1.61         | -3.71         | -4.73         | -2.04         | 1.71         | 1.18         | 1.02         | 1.31         |
| <b>miR-195-5p</b>  | <b>2.37</b>  | <b>-2.08</b> | <b>1.75</b>   | <b>-2.64</b>  | <b>-1.92</b>  | <b>-2.10</b>  | <b>1.38</b>  | <b>-1.45</b> | <b>1.60</b>  | <b>-1.43</b> |
| miR-19b-3p         | 2.43         | 1.04         | -2.40         | -5.51         | -2.91         | -2.97         | -1.45        | -1.48        | 1.02         | 1.64         |
| miR-204-5p         | 4.46         | -2.02        | 1.24          | -2.55         | -26.07        | -1.98         | -1.66        | -2.60        | -1.02        | -1.25        |
| <b>miR-218-5p</b>  | <b>2.54</b>  | <b>1.61</b>  | <b>-1.65</b>  | <b>-2.62</b>  | <b>-2.27</b>  | <b>-2.35</b>  | <b>1.52</b>  | <b>-1.36</b> | <b>1.27</b>  | <b>1.95</b>  |
| miR-222-3p         | 2.02         | 1.82         | -1.06         | -1.30         | -1.28         | -1.48         | 1.21         | -2.22        | 1.06         | 2.48         |
| miR-22-3p          | -2.04        | -3.54        | 1.65          | -4.04         | -28.46        | 0.00          | -1.48        | 1.07         | -7.36        | 1.47         |
| miR-24-3p          | 2.41         | 1.12         | 1.16          | -1.66         | -1.63         | -1.09         | -1.56        | -2.32        | -1.05        | 1.29         |
| <b>miR-26a-5p</b>  | <b>2.46</b>  | <b>1.40</b>  | <b>-1.05</b>  | <b>-2.58</b>  | <b>-2.42</b>  | <b>-3.76</b>  | <b>1.25</b>  | <b>-1.33</b> | <b>-1.06</b> | <b>1.31</b>  |
| <b>miR-29a-3p</b>  | <b>2.56</b>  | <b>1.47</b>  | <b>1.28</b>   | <b>-1.37</b>  | <b>-2.53</b>  | <b>-2.18</b>  | <b>1.46</b>  | <b>-2.07</b> | <b>-1.06</b> | <b>1.42</b>  |
| miR-29b-1-5p       | -1.41        | 1.12         | 1.13          | -2.55         | -5.68         | -1.23         | -6.07        | -1.72        | 1.04         | -2.56        |
| miR-29c-3p         | 2.53         | -1.10        | -1.24         | -2.68         | -3.03         | -2.91         | -1.67        | 1.04         | -1.12        | 1.24         |
| miR-301a-3p        | 7.61         | 1.74         | -1.62         | -5.36         | -1.13         | -1.80         | 7.49         | 1.47         | -2.30        | -3.27        |
| miR-30a-3p         | 2.50         | 2.93         | -1.44         | -2.86         | -1.52         | -1.79         | 2.43         | 3.90         | 1.11         | 1.16         |
| miR-30a-5p         | 2.03         | -1.46        | -4.59         | -5.60         | -3.16         | -2.98         | 1.94         | -1.38        | 1.03         | 1.38         |
| miR-30b-5p         | 2.24         | 1.63         | -1.57         | -3.66         | -3.47         | -3.03         | 1.53         | 1.12         | -1.13        | 1.30         |
| miR-30c-5p         | 2.58         | 1.78         | 1.16          | -1.85         | -3.00         | -2.59         | 2.51         | -1.06        | -1.10        | 1.69         |
| miR-30d-5p         | 1.50         | -1.20        | -2.10         | -5.47         | -3.51         | -1.69         | 1.53         | -1.63        | 1.11         | 2.89         |
| miR-30e-3p         | 1.23         | 2.68         | -1.33         | -2.13         | -1.89         | -3.94         | 2.26         | 3.33         | -1.33        | -1.33        |
| miR-30e-5p         | 1.03         | -3.08        | -1.22         | -1.48         | -3.42         | -2.36         | -1.85        | -2.54        | -1.40        | -1.08        |
| miR-31-5p          | 1.37         | 1.79         | 1.01          | -2.60         | -2.13         | -1.53         | -1.87        | -2.84        | 1.24         | -1.15        |
| <b>miR-324-5p</b>  | <b>0.00</b>  | <b>0.00</b>  | <b>-12.68</b> | <b>-1.01</b>  | <b>3.25</b>   | <b>2.00</b>   | <b>9.05</b>  | <b>-2.16</b> | <b>2.58</b>  | <b>1.10</b>  |
| <b>miR-328-3p</b>  | <b>2.35</b>  | <b>1.55</b>  | <b>-1.78</b>  | <b>-2.64</b>  | <b>-2.42</b>  | <b>-4.11</b>  | <b>-1.27</b> | <b>-2.23</b> | <b>1.22</b>  | <b>1.29</b>  |
| miR-331-3p         | 3.11         | 1.51         | 1.01          | -1.31         | -2.12         | -2.71         | -1.04        | -2.82        | -1.13        | 1.36         |
| miR-335-5p         | 1.45         | 1.10         | 0.00          | 0.00          | 0.00          | 0.00          | -2.35        | -1.10        | -6.60        | -7.40        |
| miR-337-5p         | 0.00         | 0.00         | 0.00          | -1.72         | 12.93         | 13.11         | -4.13        | -3.10        | 0.00         | -3.57        |
| miR-342-3p         | 11.85        | 9.32         | 2.00          | 1.07          | 1.23          | 2.65          | 3.91         | 1.61         | 2.49         | 3.88         |
| <b>miR-365-3p</b>  | <b>4.88</b>  | <b>4.43</b>  | <b>-3.03</b>  | <b>-7.38</b>  | <b>-3.34</b>  | <b>-4.34</b>  | <b>2.02</b>  | <b>-2.92</b> | <b>0.00</b>  | <b>0.00</b>  |
| miR-376b-3p        | -2.41        | -9.54        | 2.50          | -3.69         | 0.00          | 0.00          | -4.69        | -2.96        | -2.45        | -3.82        |
| miR-376c-3p        | 1.89         | 1.80         | 1.03          | -2.65         | -2.24         | -5.44         | 2.11         | 1.29         | -4.77        | -1.28        |
| miR-379-5p         | 1.99         | 2.72         | -1.27         | -7.69         | -3.41         | -3.87         | 11.06        | 1.32         | -1.20        | -4.54        |
| miR-384-5p         | 1.28         | 1.35         | -3.57         | -5.27         | -2.42         | -2.22         | 2.80         | 1.21         | 1.40         | 1.82         |
| miR-411-5p         | 2.26         | 1.93         | -1.15         | -3.75         | -1.75         | 1.05          | 1.80         | -1.21        | -1.40        | 2.83         |
| <b>miR-434-3p</b>  | <b>5.89</b>  | <b>3.08</b>  | <b>-1.21</b>  | <b>-2.63</b>  | <b>-1.56</b>  | <b>-1.37</b>  | <b>1.30</b>  | <b>-1.83</b> | <b>-1.25</b> | <b>2.64</b>  |
| miR-470-3p         | 0.00         | 0.00         | 0.00          | 0.00          | 0.00          | 0.00          | -1.30        | -1.86        | -10.20       | -11.43       |
| miR-484            | 2.49         | 1.73         | -2.09         | -2.63         | -1.96         | 1.21          | -1.00        | -1.90        | 1.68         | 1.38         |
| miR-485-3p         | 1.63         | 1.59         | 1.01          | -3.54         | -1.94         | -1.42         | -2.13        | -1.53        | -2.85        | -1.16        |
| <b>miR-491-5p</b>  | <b>-6.37</b> | <b>-7.68</b> | <b>0.00</b>   | <b>0.00</b>   | <b>0.00</b>   | <b>0.00</b>   | <b>0.00</b>  | <b>0.00</b>  | <b>-2.96</b> | <b>-1.42</b> |
| miR-495-3p         | 1.07         | -1.02        | -1.07         | -2.58         | -14.64        | -12.97        | 3.98         | 1.05         | -1.26        | -2.87        |
| <b>miR-544-5p</b>  | <b>0.00</b>  | <b>0.00</b>  | <b>3.60</b>   | <b>6.58</b>   | <b>1.03</b>   | <b>-1.67</b>  | <b>0.00</b>  | <b>0.00</b>  | <b>1.35</b>  | <b>-1.18</b> |
| miR-667-5p         | 1.32         | 1.25         | -1.76         | -1.81         | -3.15         | -2.21         | -1.29        | -3.00        | -1.46        | 1.25         |
| miR-674-3p         | 4.43         | 5.08         | 1.58          | -1.51         | -3.80         | -2.97         | -1.26        | -1.13        | 2.57         | 1.35         |
| miR-678            | 1.04         | -1.05        | -1.03         | -3.46         | -5.79         | -1.22         | -3.62        | -1.17        | -1.33        | -2.19        |
| miR-690            | 1.33         | -2.17        | 1.06          | -4.50         | -17.02        | -8.09         | -1.85        | -1.13        | -7.12        | -1.13        |
| miR-709            | 1.19         | -1.44        | 1.15          | -3.46         | -4.88         | -4.20         | -1.82        | 1.08         | -3.15        | -1.56        |
| miR-720            | -1.03        | 1.36         | -2.60         | -2.99         | -1.57         | -3.14         | -2.96        | -1.70        | -1.15        | 1.18         |
| miR-744-5p         | 1.60         | -1.23        | -1.71         | 2.42          | -2.50         | -2.02         | -2.45        | -17.42       | 1.40         | -2.87        |
| miR-760-5p         | -1.65        | -2.07        | 2.06          | -1.67         | 0.00          | 0.00          | -2.11        | -2.14        | 0.00         | -4.92        |
| miR-7a-1-3p        | 2.32         | 1.76         | -2.47         | 0.00          | -1.94         | -1.61         | 1.67         | -1.18        | -4.53        | -1.41        |
| <b>miR-7b-5p</b>   | <b>1.51</b>  | <b>3.66</b>  | <b>-2.32</b>  | <b>-4.93</b>  | <b>11.27</b>  | <b>1.95</b>   | <b>0.00</b>  | <b>0.00</b>  | <b>0.00</b>  | <b>0.00</b>  |
| miR-801            | 4.01         | 0.00         | 0.00          | 0.00          | -3.46         | -6.03         | 1.29         | 2.89         | -23.52       | -6.41        |
| miR-805            | -1.23        | -2.27        | -1.03         | -5.90         | -3.27         | -3.08         | -2.77        | -1.62        | -2.34        | -3.80        |
| miR-872-3p         | -1.59        | -1.90        | -1.76         | -6.15         | -1.64         | -1.24         | 4.04         | -2.08        | 1.69         | -5.27        |
| miR-9-3p           | 2.35         | 1.86         | -1.23         | -4.32         | -5.24         | -4.95         | 1.82         | -1.17        | -1.58        | -1.19        |
| miR-92a-3p         | 2.06         | -6.10        | 1.21          | -7.45         | -3.34         | -3.00         | 1.11         | 1.44         | 1.50         | 1.20         |
| miR-9-5p           | 2.53         | 2.06         | -2.27         | -4.88         | -1.55         | -1.32         | 1.19         | 1.75         | -1.38        | 1.01         |
| miR-99b-5p         | 3.32         | 1.82         | -2.59         | -3.77         | -4.78         | -7.13         | 1.31         | -1.29        | -2.05        | -1.52        |
