# Supplementary material for: Early Mechanisms of Pathobiology Are Revealed by Transcriptional Temporal Dynamics in Hippocampal CA1 Neurons of Prion Infected Mice
Source: PLoS Pathog. 2012 Nov 8;8(11):e1003002. doi: 10.1371/journal.ppat.1003002 (PMC3493483; doi:10.1371/journal.ppat.1003002)
Supplement: Table S3 — List of miRNAs that were up-regulated or only expressed in the infected samples at clinical stages of prion disease. Empty spaces reflect lack of signal for the indicated probe in control or infected sample. (XLS) [file ppat.1003002.s011.xls]

## Sheet: Sheet1
	Days Post Inoculation
miRNA	130	130	EP	EP
Signal in Infected and Control Samples (Fold Change)
let-7g-5p	7.40848	7.02668	0.390059	0.21073
miR-101a-3p	4.0124	1.83779	0.585724	0.353212
miR-125a-5p	4.53409	2.39566	1.52373	0.815019
miR-125b-5p	2.76027	1.14341	1.51914	1.88617
miR-126-3p	2.67123	0.828897	1.13771	1.46889
miR-126-5p			4.55903	4.25964
mir-127-3p	2.97022	1.2821	1.42785	1.43968
mir-132-3p	7.62536	1.62998	1.24115	2.62822
miR-133a-3p	0.321668	0.223297	2.51263	1.29977
miR-134-5p			3.78957	1.5584
miR-136-5p	1.16127	0.460651	1.29705	1.04388
miR-137-3p	1.00928	0.838016	1.32241	1.15204
miR-139-5p	3.81874	1.22355	1.23794	1.17336
miR-140-5p	1.3953	0.469628	2.65623	1.41592
miR-145-5p	1.69868	1.94513	1.56553	2.10072
miR-146a-5p	0.996027	0.136564	11.5667	6.01917
miR-146b-5p	2.62315	0.845311	1.8037	3.38408
miR-150-5p	1.33736	0.763038	2.75615	2.02501
miR-181a-5p	2.52659	0.476411	1.64187	1.16537
miR-188-5p	0.210422	0.402639	1.12505	1.11632
miR-191-5p	4.04588	1.29087	1.06332	1.00365
miR-193b-3p	2.854	1.3652	1.35397	1.08837
miR-19b-3p	1.148	0.782313	1.34661	1.36289
miR-218-5p	2.52615	0.85411	1.67925	1.62431
miR-222-3p	2.01847	0.522924	1.40529	2.06114
miR-24-3p	1.06751	0.500688	1.26804	1.07752
miR-26a-5p	2.08739	0.873899	1.25486	1.08896
miR-26b-5p			4.32775	2.14664
miR-29a-3p	2.42808	0.560522	1.24978	1.18049
miR-29c-3p	0.997922	1.20742	1.17929	1.03171
miR-301a-3p	14.001	1.91228	1.22142	0.578683
miR-301b-3p	2.55766	0.940277	3.02542	1.05405
miR-30a-5p	3.23901	0.839901	1.36747	1.15098
miR-30b-5p	2.55742	1.30166	1.17538	1.07855
miR-30c-5p	4.18707	1.10016	1.20299	1.4071
miR-30d-5p	2.55467	0.71068	1.46516	2.40401
miR-324-5p	9.04524	0.462846	2.58164	1.09874
miR-328-3p	1.31176	0.519601	1.62164	1.07592
miR-331-3p	1.59751	0.411693	1.1777	1.13013
miR-342-3p	6.51426	1.86688	3.29936	3.22518
miR-376c-3p	3.52032	1.49943	0.277928	0.647664
miR-379-5p	18.4282	1.53695	1.10143	0.183202
miR-384-5p	4.66966	1.40295	1.85452	1.51181
miR-410-3p	7.28058	3.85597	1.15881	1.4989
miR-433-3p	3.25502	4.83873
miR-434-3p	2.1727	0.634617	1.0602	2.19512
miR-484	1.66553	0.611354	2.22347	1.14811
miR-495-3p	6.63866	1.21382	1.05121	0.289645
miR-668-3p	3.53967	2.98944	0.456794	0.286783
miR-9-5p	1.98618	2.03028	0.958663	0.843727
miR-92a-3p	1.84606	1.66889	1.99386	0.995696
Signal Only in Infected Samples (delta Ct)
miR-19a-3p			6.6083	7.73105
miR-344-3p	2.25069	3.54011
miR-34b-3p	3.54332	1.94288	1.97087	2.79857
miR-451			4.88722	6.6664
miR-497-5p			4.98604	7.38309
miR-532-5p	3.56217	7.34879
